# Supplementary material for: Adiposity and risk of decline in glomerular filtration rate: meta-analysis of individual participant data in a global consortium
Source: PubMed Central journal article supplement — BMJ. 2019 Jan 10;364:k5301. doi: 10.1136/bmj.k5301 (PMC6481269; doi:10.1136/bmj.k5301), 2019-01-10
Supplement: chaa045978.ww.pdf [file chaa045978.ww.pdf]

## Table of Contents

|                                                                                                                                                                                                                               |    |
|-------------------------------------------------------------------------------------------------------------------------------------------------------------------------------------------------------------------------------|----|
| eAppendix 1. Data analysis overview and analytic notes for some of individual studies .....                                                                                                                                   | 3  |
| eAppendix 2. Acronyms or abbreviations for studies included in the current report and their key references linked to the Web references .....                                                                                 | 8  |
| eAppendix 3. Acknowledgements and funding for collaborating cohorts .....                                                                                                                                                     | 10 |
| eTable 1. Number of Participants, Events, and Follow-up Time by Study Cohort.....                                                                                                                                             | 14 |
| eTable 3. Baseline Characteristics by BMI Category – Demographics.....                                                                                                                                                        | 18 |
| eTable 4. Baseline Characteristics by BMI Category – Cardiovascular Disease and Chronic Kidney Disease Risk Factors .....                                                                                                     | 23 |
| eTable 5. Baseline Characteristics by BMI Category - Kidney Measures .....                                                                                                                                                    | 26 |
| eFigure 1. Relationships of BMI with Waist Circumference (A and B) and Waist-Height Ratio (C and D), in Women (A and C) and Men (B and D).....                                                                                | 29 |
| eFigure 2. Hazard Ratios at 35 vs. 25 kg/m <sup>2</sup> in Individual General Population Cohorts, by Median Baseline Year .....                                                                                               | 30 |
| eFigure 3. Sensitivity Analyses Excluding the First 3 Years of Follow-up (A), ESKD as the Sole Outcome (B), Competing Risk of Death (C), and Adjusting for Potential Mediators (D) for BMI in General Population Cohorts..... | 31 |
| eFigure 4. BMI Interactions by Age (A), Black Race (B), Hypertension (C), and Albuminuria (D) with GFR decline in General Population Cohorts.....                                                                             | 32 |
| eFigure 5. Sensitivity Analyses Excluding the First 3 Years of Follow-up (A), ESKD as the Sole Outcome (B), Competing Risk of Death (C), and Adjusting for Potential Mediators (D) for BMI in High CVD Risk Cohorts .....     | 33 |
| eFigure 6. Sensitivity Analyses Excluding the First 3 Years of Follow-up (A), ESKD as the Sole Outcome (B), Competing Risk of Death (C), and Adjusting for Potential Mediators (D) for BMI in CKD Cohorts .....               | 34 |
| eFigure 7. Association of Waist Circumference (A and C) and Waist-Height Ratio (B and D) with GFR Decline in High CVD Risk (A and B) and CKD (C and D) Cohorts.....                                                           | 35 |
| eFigure 8. Association of Adiposity Measures with All-Cause Mortality in General Population Cohorts ..                                                                                                                        | 36 |
| eFigure 9. Interaction of eGFR on BMI and Association with All-Cause Mortality in General Population Cohorts.....                                                                                                             | 37 |
| eFigure 10. Sensitivity Analyses Excluding the First 3 Years of Follow-up (A) and Adjusting for Potential Mediators (B) for BMI and All-Cause Mortality in General Population Cohorts .....                                   | 38 |
| eFigure 11. Association of Adiposity Measures with All-Cause Mortality in High Cardiovascular Risk Cohorts.....                                                                                                               | 39 |
| eFigure 12. Sensitivity Analyses Excluding the First 3 Years of Follow-up (A) and Adjusting for Potential Mediators (B) for BMI and All-Cause Mortality in High Cardiovascular Risk Cohorts .....                             | 40 |
| eFigure 13. Association of Adiposity Measures with All-Cause Mortality in CKD Cohorts.....                                                                                                                                    | 41 |

eFigure 14. Sensitivity Analyses Excluding the First 3 Years of Follow-up (A) and Adjusting for Potential Mediators (B) for BMI and All-Cause Mortality in CKD Cohorts ..... 42

References ..... 43

## eAppendix 1. Data analysis overview and analytic notes for some of individual studies

### Overview:

As previously described,<sup>1</sup> the collaborating cohorts were asked to compile a dataset with approximately 40 variables (key exposures [serum creatinine to estimate GFR and albuminuria], covariates [e.g., age, sex, race/ethnicity, diabetes], and outcomes [laboratory tests and hypertension]). To be consistent across cohorts, the CKD-PC Data Coordinating Center sent definitions for those variables to participating cohorts. We instructed studies not to impute any variables.

For 48 of the 63 cohorts in this specific study, the Data Coordination Center at Johns Hopkins University conducted the analysis; the remainder ran the standard code written in STATA by the Data Coordinating Center and shared the output with the Data Coordinating Center. The standard code was designed to automatically save all estimates and variance-covariance matrices needed for the meta-analysis. Then, the Data Coordinating Center meta-analyzed the estimates across cohorts using STATA.

As detailed in our previous reports,<sup>2,3</sup> each cohort was instructed to standardize their serum creatinine and report its method when available. The reported creatinine standardization allows grouping studies into studies that reported using a standard IDMS traceable method or conducted some serum creatinine standardization to IDMS traceable methods (ARIC, AusDiab, Beaver Dam CKD, CanPREDDICT, CARE FOR HOME, ESTHER, GCKD, Geisinger, Gonryo, Gubbio, HUNT, Maccabi, MASTERPLAN, MMKD, NephroTest, NHANES, Okinawa 83 & 93, PREVEND, Rancho Bernardo, RCAV, REGARDS, RSIII, SEED, SRR-CKD, Takahata, Tromso) and studies where the creatinine standardization was not done (AASK, ADVANCE, Aichi, BC CKD, Beijing, CCF, ChinaNS, CHS, CKD-JAC, CRIB, Framingham, IPHS, KHS, MDRD, MESA, MRC, NZDCS, Ohasama, Pima, RENAAL, Sunnybrook, ULSAM, ZODIAC). For those cohorts without standardization, the creatinine levels were reduced by 5%, the calibration factor used to adjust non-standardized MDRD Study samples to IDMS.<sup>2,4</sup> We did not adjust creatinine levels in those studies with unknown standardization status (JMS, KP Hawaii, Mt Sinai, NIPPON DATA80, NIPPON DATA90, PSP-CKD, SMART, Taiwan MJ, and TLGS).

We calculated eGFR using the CKD-EPI equation:  $eGFR_{CKD-EPI} = 141 \times (\text{minimum of standardized serum creatinine [mg/dL]/}\kappa \text{ or } 1)^{\alpha} \times (\text{maximum of standardized serum creatinine [mg/dL]/}\kappa \text{ or } 1)^{-1.209} \times 0.993^{\text{age}} \times (1.018 \text{ if female}) \times (1.159 \text{ if black})$ , where  $\kappa$  is 0.7 if female and 0.9 if male and  $\alpha$  is -0.329 if female and -0.411 if male.<sup>5</sup> The selection of knots for eGFR and ACR was based on clinical thresholds.<sup>6</sup>

### Notes for individual studies:

#### 1. General population cohorts

Aichi: This cohort had no ACR measures. We used protein measures from dipstick tests to quantify albuminuria. This cohort does not have data on waist circumference.

ARIC: This cohort had no ACR measures at baseline. 16% of the creatinine measures were more than 5 years apart.

AusDiab: 67% of the creatinine measures were more than 5 years apart.

Beaver Dam CKD: This cohort had no ACR measures. We used protein measures from dipstick tests to quantify albuminuria. 14% of the creatinine measures were more than 5 years apart.

CHS: This cohort had no ACR measures at the baseline visit.

CIRCS: This cohort does not have data on waist circumference or ACR measures. We used protein measures from dipstick tests to quantify albuminuria.

ESTHER: This cohort does not have data on waist circumference or ACR measures. We used protein measures from dipstick tests to quantify albuminuria. Follow up visit was about 8.4 years after baseline.

Framingham: 45% of the creatinine measures were more than 5 years apart.

Geisinger: This cohort does not have data on waist circumference.

HUNT: Follow up visit was 11.2 years after baseline.

IPHS: This cohort does not have data on waist circumference.

JMS: This cohort had no ACR measures. We used protein measures from dipstick tests to quantify albuminuria.

Maccabi: This cohort does not have data on waist circumference.

MESA: Participants free from previous cardiovascular disease at baseline.

MRC: This cohort had no ACR measures. We used protein measures from dipstick tests to quantify albuminuria.

Mt Sinai BioMe: This cohort does not have data on waist circumference. Data for the outcome of death was not available.

NHANES: This cohort does not have data on waist circumference. Data for the outcome of ESKD was not available.

NIPPON DATA80: This cohort had no ACR measures or data on waist circumference.

NIPPON DATA90: This cohort had no ACR measures or data on waist circumference.

Ohasama: This cohort had no ACR measures. We used protein measures from dipstick tests to quantify albuminuria. 21% of the visits are more than 5 years apart.

Okinawa 83: This cohort does not have data on smoking or waist circumference. Antihypertensive medication use was not available. 4,614 subjects from the Okinawa 83 cohort were measured for creatinine again in 93 and these constitute the eGFR decline outcome.

Okinawa 93: This cohort does not have data on smoking or waist circumference. Antihypertensive medication use was not available.

PREVEND: 29% of the visits are more than 5 years apart.

Rancho Bernardo: 12% of the visits are more than 5 years apart.

RCAV: This cohort does not have data on waist circumference or smoking.

REGARDS: Follow up visit is 9.4 years from baseline.

SEED: This cohort does not have data on waist circumference and has no ACR measures.

Takahata: This cohort does not have data on waist circumference. Creatinine was not measured again after baseline. Data for the outcome of ESKD was not available.

TLGS: This cohort had no ACR measures. We used protein measures from dipstick tests to quantify albuminuria. 15% of the visits were more than 5 years apart.

Tromso: All of the creatinine measures were more than 5 years apart.

ULSAM: This cohort does not have data on waist circumference, smoking, or ACR measures. Data on use of antihypertensive medications was not available. Follow up was 21 years after baseline.

## 2. High-risk cohorts

ADVANCE: This study is an intervention study which includes participants with diabetes only.

KP Hawaii: This cohort does not have data on smoking or waist circumference. Data on use of antihypertensive medications was not available.

NZDCS: This cohort does not have data on waist circumference.

Pima: History of cardiovascular disease was not available. 38% of the visits are more than 5 years apart.

ZODIAC: This cohort does not have data on waist circumference. 14% of visits were more than 5 years apart.

## 3. CKD cohorts

AASK: This cohort does not have data on waist circumference. Urine protein-to-creatinine ratio was converted to urine albumin-to-creatinine ratio by dividing by 2.655 for men and 1.7566 for women.

BC CKD: This cohort does not have data on waist circumference.

CanPREDDICT: This cohort does not have data on smoking or waist circumference.

CARE FOR HOME: ACR was not measured at baseline for this cohort.

CCF: This cohort does not have data on waist circumference. History of cardiovascular disease was defined as history of either coronary artery disease or coronary heart failure.

Gonryo: This cohort does not have data on waist circumference, smoking, or ACR measures. We used protein measures from dipstick tests to quantify albuminuria.

MDRD: This cohort does not have data on waist circumference. Urine protein-to-creatinine ratio was converted to urine albumin-to-creatinine ratio by dividing by 2.655 for men and 1.7566 for women. Anti-hypertensive medication use was not available.

MMKD: This cohort does not have data on waist circumference. Urine protein-to-creatinine ratio was converted to urine albumin-to-creatinine ratio by dividing by 2.655 for men and 1.7566 for women.

Nefrona: Patients free from previous cardiovascular disease.

NephroTest; This cohort does not have data on waist circumference.

PSP-CKD: This cohort does not have data on waist circumference. Urine protein-to-creatinine ratio was converted to urine albumin-to-creatinine ratio by dividing by 2.655 for men and 1.7566 for women.

RENAAL: This cohort does not have data on waist circumference. History of cardiovascular disease was not available.

SRR-CKD: This cohort does not have data on smoking

Sunnybrook: This cohort includes patients seen in the nephrology clinics at Sunnybrook Hospital in Toronto, Ontario, Canada with CKD stage 3-5 or proteinuric CKD stage 1-2. Urine protein-to-creatinine ratio was converted to urine albumin-to-creatinine ratio by dividing by 2.655 for men and 1.7566 for women.

**ESKD ascertainment by study:**

| <b>Study</b>     | <b>Ascertainment type</b>      |
|------------------|--------------------------------|
| AASK             | Active                         |
| ADVANCE          | Active                         |
| Aichi            | n/a                            |
| ARIC             | Linkage to registry, Codes     |
| AusDiab          | n/a                            |
| BC CKD           | Active                         |
| Beaver Dam CKD   | n/a                            |
| Beijing          | n/a                            |
| CanPREDDICT      | Active                         |
| CARE FOR HOME    | n/a                            |
| CCF              | Linkage to registry            |
| ChinaNS          | n/a                            |
| CHS              | Linkage to registry            |
| CIRCS            | n/a                            |
| CKD-JAC          | Active                         |
| COBRA            | n/a                            |
| CRIB             | Active (with chart validation) |
| ESTHER           | n/a                            |
| Framingham       | n/a                            |
| GCKD             | Active (with confirmation)     |
| Geisinger        | Linkage to registry            |
| Gonryo           | Active                         |
| Gubbio           | n/a                            |
| HUNT             | Active, Linkage to registry    |
| IPHS             | n/a                            |
| JHS              | n/a                            |
| JMS              | n/a                            |
| KHS              | Codes                          |
| KP Hawaii        | Active                         |
| Maccabi          | Active                         |
| MASTERPLAN       | Active                         |
| MDRD             | Active, Linkage to registry    |
| MESA             | n/a                            |
| MMKD             | Active                         |
| MRC Older People | n/a                            |
| Mt Sinai BioMe   | Codes                          |
| Nefrona          | Active                         |
| NephroTest       | Linkage to registry            |
| NHANES           | n/a                            |
| NIPPON DATA80    | n/a                            |
| NIPPON DATA90    | n/a                            |
| NZDCS            | Linkage to registry, ICD codes |
| Ohasama          | n/a                            |
| Okinawa 83/93    | Linkage to registry            |
| Pima             | Active, Linkage to registry    |
| PREVEND          | n/a                            |
| PSP-CKD          | Active                         |
| Rancho Bernardo  | n/a                            |
| RCAV             | Linkage to registry            |
| REGARDS          | Linkage to registry            |
| RENAAL           | Active (with adjudication)     |
| RSIII            | n/a                            |

|            |                                |
|------------|--------------------------------|
| SEED       | n/a                            |
| SMART      | Active (with chart validation) |
| SRR-CKD    | Active, Linkage to registry    |
| Sunnybrook | Linkage to registry            |
| Taiwan MJ  | n/a                            |
| Takahata   | n/a                            |
| TLGS       | n/a                            |
| Tromso     | n/a                            |
| ULSAM      | n/a                            |
| ZODIAC     | n/a                            |

## eAppendix 2. Acronyms or abbreviations for studies included in the current report and their key references linked to the Web references

|                   |                                                                                                                                                                     |
|-------------------|---------------------------------------------------------------------------------------------------------------------------------------------------------------------|
| AASK:             | African American Study of Kidney Disease and Hypertension <sup>7</sup>                                                                                              |
| ADVANCE:          | The Action in Diabetes and Vascular Disease: Preterax and Diamicon Modified Release Controlled Evaluation (ADVANCE) trial <sup>8</sup>                              |
| Aichi:            | Aichi Workers' Cohort Study <sup>9</sup>                                                                                                                            |
| ARIC:             | Atherosclerosis Risk in Communities Study <sup>10</sup>                                                                                                             |
| AusDiab:          | Australian Diabetes, Obesity, and Lifestyle Study <sup>11</sup>                                                                                                     |
| BC CKD:           | British Columbia CKD Study <sup>12</sup>                                                                                                                            |
| Beaver Dam CKD:   | Beaver Dam CKD Study <sup>13</sup>                                                                                                                                  |
| Beijing:          | Beijing Cohort Study <sup>14</sup>                                                                                                                                  |
| CanPREDDICT:      | Canadian Study of Prediction of Death, Dialysis and Interim Cardiovascular Events <sup>15</sup>                                                                     |
| CARE FOR HOME:    | The Cardiovascular and Renal Outcome in CKD 2-4 Patients—The Fourth Homburg evaluation                                                                              |
| CCF:              | Cleveland Clinic CKD Registry Study <sup>16</sup>                                                                                                                   |
| ChinaNS:          | The China National Survey of Chronic Kidney Disease                                                                                                                 |
| CHS:              | Cardiovascular Health Study <sup>17</sup>                                                                                                                           |
| CIRCS:            | Circulatory Risk in Communities Study <sup>18</sup>                                                                                                                 |
| CKD-JAC:          | Chronic Kidney Disease Japan Cohort                                                                                                                                 |
| COBRA:            | COBRA Study <sup>19</sup>                                                                                                                                           |
| CRIB:             | Chronic Renal Impairment in Birmingham <sup>20</sup>                                                                                                                |
| ESTHER:           | Epidemiologische Studie zu Chancen der Verhütung, Früherkennung und optimierten Therapie chronischer ERkrankungen in der älteren Bevölkerung [GERMAN] <sup>21</sup> |
| Framingham:       | Framingham Heart Study <sup>22</sup>                                                                                                                                |
| GCKD:             | German Chronic Kidney Disease Study <sup>23</sup>                                                                                                                   |
| Geisinger:        | Geisinger Health System <sup>24</sup>                                                                                                                               |
| Gonryo:           | Gonryo Study                                                                                                                                                        |
| Gubbio:           | Gubbio Study <sup>25</sup>                                                                                                                                          |
| HUNT:             | Nord Trøndelag Health Study <sup>26</sup>                                                                                                                           |
| IPHS:             | Ibaraki Prefectural Health Study <sup>27</sup>                                                                                                                      |
| JHS:              | Jackson Heart Study                                                                                                                                                 |
| JMS:              | Jichi Medical School cohort                                                                                                                                         |
| KHS:              | Korean Heart Study                                                                                                                                                  |
| KP Hawaii:        | Kaiser Permanente Hawaii Cohort <sup>28</sup>                                                                                                                       |
| Maccabi:          | Maccabi Health System <sup>29</sup>                                                                                                                                 |
| MASTERPLAN:       | Multifactorial Approach and Superior Treatment Efficacy in Renal Patients with the Aid of a Nurse Practitioner <sup>30</sup>                                        |
| MDRD:             | Modification of Diet in Renal Disease Study <sup>31</sup>                                                                                                           |
| MESA:             | Multi-Ethnic Study of Atherosclerosis <sup>32</sup>                                                                                                                 |
| MMKD:             | Mild to Moderate Kidney Disease Study <sup>33</sup>                                                                                                                 |
| MRC Older People: | MRC Study of assessment of older people <sup>34</sup>                                                                                                               |
| Mt Sinai BioMe:   | Mount Sinai BioMe Biobank Platform <sup>35</sup>                                                                                                                    |
| Nefrona:          | Nefrona Study <sup>36</sup>                                                                                                                                         |
| NephroTest:       | NephroTest Study <sup>37</sup>                                                                                                                                      |
| NHANES:           | US National Health and Nutrition Examination Survey, using both NHANES III and the continuous NHANES from 1999-2010 <sup>38</sup>                                   |
| NIPPON DATA80:    | National Integrated Project for Prospective Observation of Non-communicable Disease and its Trends in the Aged 1980                                                 |
| NIPPON DATA90:    | National Integrated Project for Prospective Observation of Non-communicable Disease and its Trends in the Aged 1990                                                 |
| NZDCS:            | New Zealand Diabetes Cohort Study <sup>39</sup>                                                                                                                     |
| Ohasama:          | Ohasama Study <sup>40</sup>                                                                                                                                         |



|                  |                                                                                                                             |
|------------------|-----------------------------------------------------------------------------------------------------------------------------|
| Okinawa 83:      | Okinawa 83 Cohort <sup>41</sup>                                                                                             |
| Okinawa 93:      | Okinawa 93 Cohort <sup>42</sup>                                                                                             |
| Pima:            | Pima Indian Study <sup>43</sup>                                                                                             |
| PREVEND:         | Prevention of Renal and Vascular End-stage Disease Study <sup>44</sup>                                                      |
| PSP-CKD:         | Primary-Secondary Care Partnership to Prevent Adverse Outcomes in Chronic Kidney Disease                                    |
| Rancho Bernardo: | Rancho Bernardo Study <sup>45</sup>                                                                                         |
| RCAV:            | Racial and Cardiovascular Risk Anomalies in CKD Cohort <sup>46</sup>                                                        |
| REGARDS:         | Reasons for Geographic And Racial Differences in Stroke Study <sup>47</sup>                                                 |
| RENAAL:          | Reduction of Endpoints in Non-insulin Dependent Diabetes Mellitus with the Angiotensin II Antagonist Losartan <sup>48</sup> |
| RSIII:           | Rotterdam Study Third Cohort <sup>49</sup>                                                                                  |
| SEED:            | Singapore Epidemiology of Eye Diseases <sup>50</sup>                                                                        |
| SMART:           | Second Manifestations of ARTERial Disease Study                                                                             |
| SRR-CKD:         | Swedish Renal Registry CKD Cohort <sup>51</sup>                                                                             |
| Sunnybrook:      | Sunnybrook Cohort <sup>52</sup>                                                                                             |
| Taiwan MJ:       | Taiwan MJ Cohort Study <sup>53</sup>                                                                                        |
| Takahata:        | Takahata Study <sup>54</sup>                                                                                                |
| TLGS:            | Tehran Lipid and Glucose Study <sup>55</sup>                                                                                |
| Tromso:          | Tromso Study                                                                                                                |
| ULSAM:           | Uppsala Longitudinal Study of Adult Men <sup>56</sup>                                                                       |
| ZODIAC:          | Zwolle Outpatient Diabetes project Integrating Available Care <sup>57</sup>                                                 |

### eAppendix 3. Acknowledgements and funding for collaborating cohorts

| Study          | List of sponsors                                                                                                                                                                                                                                                                                                                                                                                                                                                                                                                                                                                                                                                                                                                                                                  |
|----------------|-----------------------------------------------------------------------------------------------------------------------------------------------------------------------------------------------------------------------------------------------------------------------------------------------------------------------------------------------------------------------------------------------------------------------------------------------------------------------------------------------------------------------------------------------------------------------------------------------------------------------------------------------------------------------------------------------------------------------------------------------------------------------------------|
| AASK           | AASK was supported by grants to each clinical center and the coordinating center from the National Institute of Diabetes and Digestive and Kidney Diseases. In addition, AASK was supported by the Office of Research in Minority Health (now the National Center on Minority Health and Health Disparities, NCMHD) and the following institutional grants from the National Institutes of Health: M01 RR-00080, M01 RR-00071, M0100032, P20-RR11145, M01 RR00827, M01 RR00052, 2P20 RR11104, RR029887, and DK 2818-02. King Pharmaceuticals provided monetary support and antihypertensive medications to each clinical center. Pfizer Inc, AstraZeneca Pharmaceuticals, Glaxo Smith Kline, Forest Laboratories, Pharmacia and Upjohn also donated antihypertensive medications. |
| ADVANCE        | National Health and Medical Research Council (NHMRC) of Australia program grants 358395 and 571281 and project grant 211086                                                                                                                                                                                                                                                                                                                                                                                                                                                                                                                                                                                                                                                       |
| Aichi          | KAKENHI (09470112, 13470087, 17390185, 18590594, 20590641, 20790438, 22390133, 26293153)                                                                                                                                                                                                                                                                                                                                                                                                                                                                                                                                                                                                                                                                                          |
| ARIC           | The Atherosclerosis Risk in Communities study has been funded in whole or in part with Federal funds from the National Heart, Lung, and Blood Institute, National Institutes of Health, Department of Health and Human Services, under Contract nos. (HHSN268201700001I, HHSN268201700003I, HHSN268201700005I, HHSN268201700004I, HHSN268201700002I). The authors thank the staff and participants of the ARIC study for their important contributions.                                                                                                                                                                                                                                                                                                                           |
| AusDiab        | The Baker IDI Heart and Diabetes Institute, Melbourne, Australia, their sponsors, and the National Health and Medical Research Council of Australia (NHMRC grant 233200), Amgen Australia, Kidney Health Australia and The Royal Prince Alfred Hospital, Sydney, Australia.                                                                                                                                                                                                                                                                                                                                                                                                                                                                                                       |
| BC CKD         | BC Provincial Renal Agency, an Agency of the Provincial Health Services Authority in collaboration with University of British Columbia.                                                                                                                                                                                                                                                                                                                                                                                                                                                                                                                                                                                                                                           |
| Beaver Dam CKD | 2U10EY006594                                                                                                                                                                                                                                                                                                                                                                                                                                                                                                                                                                                                                                                                                                                                                                      |
| Beijing        | The research for this study was supported by the Program for New Century Excellent Talents in University (BMU2009131) from the Ministry of Education of the People's Republic of China, and the grants for the Early Detection and Prevention of Non-communicable Chronic Diseases from the International Society of Nephrology Research Committee.                                                                                                                                                                                                                                                                                                                                                                                                                               |
| CanPREDDICT    |                                                                                                                                                                                                                                                                                                                                                                                                                                                                                                                                                                                                                                                                                                                                                                                   |
| CARE FOR HOME  | Supported by the Else Kröner-Fresenius Stiftung                                                                                                                                                                                                                                                                                                                                                                                                                                                                                                                                                                                                                                                                                                                                   |
| CCF            | Supported by an unrestricted educational grant from Amgen to the Department of Nephrology and Hypertension.                                                                                                                                                                                                                                                                                                                                                                                                                                                                                                                                                                                                                                                                       |
| ChinaNS        |                                                                                                                                                                                                                                                                                                                                                                                                                                                                                                                                                                                                                                                                                                                                                                                   |
| CHS            | This research was supported by contracts HHSN268201200036C, HHSN268200800007C, HHSN268201800001C, N01HC55222, N01HC85079, N01HC85080, N01HC85081, N01HC85082, N01HC85083, N01HC85086, and grants U01HL080295 and U01HL130114 from the National Heart, Lung, and Blood Institute (NHLBI), with additional contribution from the National Institute of Neurological Disorders and Stroke (NINDS). Additional support was provided by R01AG023629 from the National Institute on Aging (NIA). A full list of principal CHS investigators and institutions can be found at CHS-NHLBI.org.                                                                                                                                                                                             |
| CIRCS          |                                                                                                                                                                                                                                                                                                                                                                                                                                                                                                                                                                                                                                                                                                                                                                                   |
| CKD-JAC        |                                                                                                                                                                                                                                                                                                                                                                                                                                                                                                                                                                                                                                                                                                                                                                                   |

|            |                                                                                                                                                                                                                                                                                                                                                                                                                                                                                                                                                                                                                                                                                                                                                                                                                                                                                                                                |
|------------|--------------------------------------------------------------------------------------------------------------------------------------------------------------------------------------------------------------------------------------------------------------------------------------------------------------------------------------------------------------------------------------------------------------------------------------------------------------------------------------------------------------------------------------------------------------------------------------------------------------------------------------------------------------------------------------------------------------------------------------------------------------------------------------------------------------------------------------------------------------------------------------------------------------------------------|
| COBRA      |                                                                                                                                                                                                                                                                                                                                                                                                                                                                                                                                                                                                                                                                                                                                                                                                                                                                                                                                |
| CRIB       | British Renal Society Project Grant Award<br>British Heart Foundation Project Grant Award.                                                                                                                                                                                                                                                                                                                                                                                                                                                                                                                                                                                                                                                                                                                                                                                                                                     |
| ESTHER     | Ministry of Research, Science and the Arts Baden-Württemberg (Stuttgart, Germany), Federal Ministry of Education and Research (Berlin, Germany), Federal Ministry of Family Affairs, Senior Citizens, Women and Youth (Berlin, Germany), European Commission FP7 framework programme of DG-Research (CHANCES Project). Measurement of urinary albumin was funded by Dade-Behring, Marburg, Germany.                                                                                                                                                                                                                                                                                                                                                                                                                                                                                                                            |
| Framingham | NHLBI Framingham Heart Study (N01-HC-25195).                                                                                                                                                                                                                                                                                                                                                                                                                                                                                                                                                                                                                                                                                                                                                                                                                                                                                   |
| GCKD       | The GCKD study is supported by grants from the Federal Ministry of Education and Research (Bundesministerium für Bildung und Forschung; <a href="http://www.bmbf.de">www.bmbf.de</a> ), FKZ 01ER 0804, 01ER 0818, 01ER 0819, 01ER 0820 und 01ER 0821 and the Foundation for Preventive Medicine of the KfH (Kuratorium für Heimdialyse und Nierentransplantation e.V. – Stiftung Präventivmedizin; <a href="http://www.kfh-stiftung-praeventivmedizin.de">www.kfh-stiftung-praeventivmedizin.de</a> ) and corporate partners (for a list see <a href="http://www.gckd.org">www.gckd.org</a> ). The GCKD investigators gratefully acknowledge the expert support of all members of study staff, the dedicated contribution of all collaborating nephrologists (for a list of contributors and the 169 study sites, see <a href="http://www.gckd.org">www.gckd.org</a> ) and the support of patients participating in the study. |
| Geisinger  | Geisinger Clinic                                                                                                                                                                                                                                                                                                                                                                                                                                                                                                                                                                                                                                                                                                                                                                                                                                                                                                               |
| Gonryo     |                                                                                                                                                                                                                                                                                                                                                                                                                                                                                                                                                                                                                                                                                                                                                                                                                                                                                                                                |
| Gubbio     | Municipal and Health Authorities of Gubbio, Italy; Center of Gubbio Epidemiological Studies, Gubbio, Italy; University of Salerno, Salerno, Italy.                                                                                                                                                                                                                                                                                                                                                                                                                                                                                                                                                                                                                                                                                                                                                                             |
| HUNT       | Faculty of Medicine, Norwegian University of Science and Technology; The Norwegian Institute of Public Health; Nord-Trøndelag County Council; and Central Norway Regional Health Authority                                                                                                                                                                                                                                                                                                                                                                                                                                                                                                                                                                                                                                                                                                                                     |
| IPHS       |                                                                                                                                                                                                                                                                                                                                                                                                                                                                                                                                                                                                                                                                                                                                                                                                                                                                                                                                |
| JHS        | The Jackson Heart Study (JHS) is supported and conducted in collaboration with Jackson State University (HHSN268201300049C and HHSN268201300050C), Tougaloo College (HHSN268201300048C), and the University of Mississippi Medical Center (HHSN268201300046C and HHSN268201300047C) contracts from the National Heart, Lung, and Blood Institute (NHLBI) and the National Institute for Minority Health and Health Disparities (NIMHD). The authors also wish to thank the staffs and participants of the JHS.                                                                                                                                                                                                                                                                                                                                                                                                                 |
| JMS        |                                                                                                                                                                                                                                                                                                                                                                                                                                                                                                                                                                                                                                                                                                                                                                                                                                                                                                                                |
| KHS        |                                                                                                                                                                                                                                                                                                                                                                                                                                                                                                                                                                                                                                                                                                                                                                                                                                                                                                                                |
| KP Hawaii  |                                                                                                                                                                                                                                                                                                                                                                                                                                                                                                                                                                                                                                                                                                                                                                                                                                                                                                                                |
| Maccabi    |                                                                                                                                                                                                                                                                                                                                                                                                                                                                                                                                                                                                                                                                                                                                                                                                                                                                                                                                |
| MASTERPLAN | The MASTERPLAN study is a clinical trial with trial registration ISRCTN registry: 73187232. Sources of funding: The MASTERPLAN Study was supported by grants from the Dutch Kidney Foundation (Nierstichting Nederland, number PV 01), and the Netherlands Heart Foundation (Nederlandse Hartstichting, number 2003 B261). Unrestricted grants were provided by Amgen, Genzyme, Pfizer and Sanofi-Aventis.                                                                                                                                                                                                                                                                                                                                                                                                                                                                                                                     |
| MDRD       | NIDDK U01 DK35073 and K23 DK67303, K23 DK02904                                                                                                                                                                                                                                                                                                                                                                                                                                                                                                                                                                                                                                                                                                                                                                                                                                                                                 |
| MESA       | This research was supported by contracts HHSN268201500003I, N01-HC-95159, N01-HC-95160, N01-HC-95161, N01-HC-95162, N01-HC-95163, N01-HC-95164, N01-HC-95165,                                                                                                                                                                                                                                                                                                                                                                                                                                                                                                                                                                                                                                                                                                                                                                  |

|                  |                                                                                                                                                                                                                                                                                                                                                                                                                                                                                                                                                                                                                                                                                                                                                                                                                               |
|------------------|-------------------------------------------------------------------------------------------------------------------------------------------------------------------------------------------------------------------------------------------------------------------------------------------------------------------------------------------------------------------------------------------------------------------------------------------------------------------------------------------------------------------------------------------------------------------------------------------------------------------------------------------------------------------------------------------------------------------------------------------------------------------------------------------------------------------------------|
|                  | N01-HC-95166, N01-HC-95167, N01-HC-95168 and N01-HC-95169 from the National Heart, Lung, and Blood Institute and by grants UL1-TR-000040 and UL1-TR-001079 from NCCR. The authors thank the other investigators, the staff, and the participants of the MESA study for their valuable contributions. A full list of participating MESA investigators and institutions can be found at <a href="http://www.mesa-nhlbi.org">http://www.mesa-nhlbi.org</a> .                                                                                                                                                                                                                                                                                                                                                                     |
| MMKD             | The MMKD study was funded by the Austrian Heart Fund and by the Innsbruck Medical University.                                                                                                                                                                                                                                                                                                                                                                                                                                                                                                                                                                                                                                                                                                                                 |
| MRC Older People | UK Medical Research Council, Department of Health for England, Wales and the Scottish Office and Kidney Research UK                                                                                                                                                                                                                                                                                                                                                                                                                                                                                                                                                                                                                                                                                                           |
| Mt Sinai BioMe   |                                                                                                                                                                                                                                                                                                                                                                                                                                                                                                                                                                                                                                                                                                                                                                                                                               |
| Nefrona          | The Nefrona study was funded by research grants from Abvie, and Instituto de Salud Carlos III (PI13/01565, PI16/01354, RD16/0009/0011 (Co-funded by European Regional Development Fund “A way to make Europe”).                                                                                                                                                                                                                                                                                                                                                                                                                                                                                                                                                                                                               |
| NephroTest       | The NephroTest CKD cohort study is supported by grants from: Inserm GIS-IReSP AO 8113LS TGIR; French Ministry of Health AOM 09114 and AOM 10245; Inserm AO 8022LS; Agence de la Biomédecine R0 8156LL, AURA, and Roche 2009-152-447G. The Nephrotest initiative was also sponsored by unrestricted grants from F.Hoffman-La Roche Ltd.<br>The authors thank the collaborators and the staff of the NephroTest Study: François Vrtovsnik, Eric Daugas, Martin Flamant, Emmanuelle Vidal-Petiot (Bichat Hospital); Christian Jacquot, Alexandre Karras, Eric Thervet, Christian d'Auzac, P. Houillier, M. Courbebaisse, D. Eladari et G. Maruani (European Georges Pompidou Hospital ); Jean-Jacques Boffa, Pierre Ronco, H. Fessi, Eric Rondeau, Emmanuel Letavernier, Jean Philippe Haymann, P. Urena-Torres (Tenon Hospital) |
| NHANES           | United States Center for Disease Control                                                                                                                                                                                                                                                                                                                                                                                                                                                                                                                                                                                                                                                                                                                                                                                      |
| NIPPON DATA80    | Health and Labour Sciences Research Grants of the Ministry of Health, Labour and Welfare, Japan (Comprehensive Research on Life-Style Related Diseases including Cardiovascular Diseases and Diabetes Mellitus [H22-Junkankitou-Seishuu-Sitei-017, H25-Junkankitou-Seishuu-Sitei-022])                                                                                                                                                                                                                                                                                                                                                                                                                                                                                                                                        |
| NIPPON DATA90    | Health and Labour Sciences Research Grants of the Ministry of Health, Labour and Welfare, Japan (Comprehensive Research on Life-Style Related Diseases including Cardiovascular Diseases and Diabetes Mellitus [H22-Junkankitou-Seishuu-Sitei-017, H25-Junkankitou-Seishuu-Sitei-022])                                                                                                                                                                                                                                                                                                                                                                                                                                                                                                                                        |
| NZDCS            | New Zealand Health Research Council, Auckland Medical Research Foundation and New Zealand Society for the Study of Diabetes                                                                                                                                                                                                                                                                                                                                                                                                                                                                                                                                                                                                                                                                                                   |
| Ohasama          | Grant-in-Aid(H20-22Junkankitou[Seishuu]-Ippan-009, 013 and H23-Junkankitou [Senshuu]-Ippan-005) from the Ministry of Health, Labor and Welfare, Health and Labor Sciences Research Grants, Japan; Japan Atherosclerosis Prevention Fund.                                                                                                                                                                                                                                                                                                                                                                                                                                                                                                                                                                                      |
| Okinawa 83/93    |                                                                                                                                                                                                                                                                                                                                                                                                                                                                                                                                                                                                                                                                                                                                                                                                                               |
| Pima             | This work was supported by the Intramural Research Program of the National Institute of Diabetes and Digestive and Kidney Diseases.                                                                                                                                                                                                                                                                                                                                                                                                                                                                                                                                                                                                                                                                                           |
| PREVEND          | The PREVEND study is supported by several grants from the Dutch Kidney Foundation, and grants from the Dutch Heart Foundation, the Dutch Government (NWO), the US National Institutes of Health (NIH) and the University Medical Center Groningen, The Netherlands (UMCG). Dade Behring, Marburg, Germany supplied equipment and reagents for nephelometric measurement of urinary albumin.                                                                                                                                                                                                                                                                                                                                                                                                                                   |
| PSP-CKD          | The PSP-CKD study was funded by the National Institute for Health Research (NIHR) Collaboration for Leadership in Applied Health Research and Care (CLAHRC) East Midlands. Ongoing support for the study is funded by NIHR CLAHRC East Midlands and Kidney Research UK (Grant TF2/2015).                                                                                                                                                                                                                                                                                                                                                                                                                                                                                                                                      |
| Rancho Bernardo  | NIA AG07181 and AG028507 NIDDK DK31801                                                                                                                                                                                                                                                                                                                                                                                                                                                                                                                                                                                                                                                                                                                                                                                        |

|            |                                                                                                                                                                                                                                                                                                                                                                                                                                                                                                                                                                                                                                                                                                                                                                                                                                                                                                                                                                                                                                                                                                                                                                                                                                                                                                                                                    |
|------------|----------------------------------------------------------------------------------------------------------------------------------------------------------------------------------------------------------------------------------------------------------------------------------------------------------------------------------------------------------------------------------------------------------------------------------------------------------------------------------------------------------------------------------------------------------------------------------------------------------------------------------------------------------------------------------------------------------------------------------------------------------------------------------------------------------------------------------------------------------------------------------------------------------------------------------------------------------------------------------------------------------------------------------------------------------------------------------------------------------------------------------------------------------------------------------------------------------------------------------------------------------------------------------------------------------------------------------------------------|
| RCAV       | This study was supported by grant R01DK096920 from NIH-NIDDK and is the result of work supported with resources and the use of facilities at the Memphis VA Medical Center and the Long Beach VA Medical Center. Support for VA/CMS data is provided by the Department of Veterans Affairs, Veterans Health Administration, Office of Research and Development, Health Services Research and Development, VA Information Resource Center (project numbers SDR 02-237 and 98-004).                                                                                                                                                                                                                                                                                                                                                                                                                                                                                                                                                                                                                                                                                                                                                                                                                                                                  |
| REGARDS    | This research project is supported by a cooperative agreement U01 NS041588 from the National Institute of Neurological Disorders and Stroke, National Institutes of Health, Department of Health and Human Service. The content is solely the responsibility of the authors and does not necessarily represent the official views of the National Institute of Neurological Disorders and Stroke or the National Institutes of Health. Representatives of the funding agency have been involved in the review of the manuscript but not directly involved in the collection, management, analysis or interpretation of the data. The authors thank the other investigators, the staff, and the participants of the REGARDS study for their valuable contributions. A full list of participating REGARDS investigators and institutions can be found at <a href="http://www.regardsstudy.org">http://www.regardsstudy.org</a><br>Additional funding was provided by an investigator-initiated grant-in-aid from Amgen and an investigator-initiated National Heart, Lung, and Blood Institute (NHLBI) grant R01 HL080477. Representatives from Amgen or NHLBI did not have any role in the design and conduct of the study, the collection, management, analysis, and interpretation of the data, or the preparation or approval of the manuscript. |
| RENAAL     | The RENAAL trial was supported by Merck and Company.                                                                                                                                                                                                                                                                                                                                                                                                                                                                                                                                                                                                                                                                                                                                                                                                                                                                                                                                                                                                                                                                                                                                                                                                                                                                                               |
| RSIII      | The Rotterdam Study is funded by Erasmus Medical Center and Erasmus University, Rotterdam, Netherlands Organization for the Health Research and Development (ZonMw), the Research Institute for Diseases in the Elderly (RIDE), the Ministry of Education, Culture and Science, the Ministry for Health, Welfare and Sports, the European Commission (DG XII), and the Municipality of Rotterdam                                                                                                                                                                                                                                                                                                                                                                                                                                                                                                                                                                                                                                                                                                                                                                                                                                                                                                                                                   |
| SEED       | This study was supported by grants from the Singapore Ministry of Health's National Medical Research Council (NMRC), NMRC/STaR/0003/2008, NMRC/0796/2003, and NMRC/TA/0008/2012.                                                                                                                                                                                                                                                                                                                                                                                                                                                                                                                                                                                                                                                                                                                                                                                                                                                                                                                                                                                                                                                                                                                                                                   |
| SMART      | Funded by the University Medical Center Utrecht.                                                                                                                                                                                                                                                                                                                                                                                                                                                                                                                                                                                                                                                                                                                                                                                                                                                                                                                                                                                                                                                                                                                                                                                                                                                                                                   |
| SRR-CKD    | The SRR-CKD is a national health care quality register funded by The Swedish Association of Local Authorities and Regions, which is an organization that represents and advocates for local government in Sweden. All of Sweden's municipalities, county councils and regions are members.                                                                                                                                                                                                                                                                                                                                                                                                                                                                                                                                                                                                                                                                                                                                                                                                                                                                                                                                                                                                                                                         |
| Sunnybrook |                                                                                                                                                                                                                                                                                                                                                                                                                                                                                                                                                                                                                                                                                                                                                                                                                                                                                                                                                                                                                                                                                                                                                                                                                                                                                                                                                    |
| Taiwan MJ  | This study was supported by Taiwan Department of Health Clinical Trial and Research Centre of Excellence (DOH 101-TD-B-111-004)                                                                                                                                                                                                                                                                                                                                                                                                                                                                                                                                                                                                                                                                                                                                                                                                                                                                                                                                                                                                                                                                                                                                                                                                                    |
| Takahata   | A Grant-in-Aid from the 21st Century Center of Excellence (COE) and Global COE program of the Japan Society for the Promotion of Science                                                                                                                                                                                                                                                                                                                                                                                                                                                                                                                                                                                                                                                                                                                                                                                                                                                                                                                                                                                                                                                                                                                                                                                                           |
| TLGS       |                                                                                                                                                                                                                                                                                                                                                                                                                                                                                                                                                                                                                                                                                                                                                                                                                                                                                                                                                                                                                                                                                                                                                                                                                                                                                                                                                    |
| Tromso     |                                                                                                                                                                                                                                                                                                                                                                                                                                                                                                                                                                                                                                                                                                                                                                                                                                                                                                                                                                                                                                                                                                                                                                                                                                                                                                                                                    |
| ULSAM      | The Swedish Research Council, the Swedish Heart-Lung Foundation, the Marianne and Marcus Wallenberg Foundation, Dalarna University, and Uppsala University.                                                                                                                                                                                                                                                                                                                                                                                                                                                                                                                                                                                                                                                                                                                                                                                                                                                                                                                                                                                                                                                                                                                                                                                        |
| ZODIAC     |                                                                                                                                                                                                                                                                                                                                                                                                                                                                                                                                                                                                                                                                                                                                                                                                                                                                                                                                                                                                                                                                                                                                                                                                                                                                                                                                                    |

**eTable 1. Number of Participants, Events, and Follow-up Time by Study Cohort**

| Study                        | Baseline Year(s) | N*             | Follow-up time for death (y) | Follow-up time to ESKD (y) | Follow-up time for GFR decline† (y) | Death         | ESKD Events  | GFR decline† events |
|------------------------------|------------------|----------------|------------------------------|----------------------------|-------------------------------------|---------------|--------------|---------------------|
| <b>General Population</b>    |                  |                |                              |                            |                                     |               |              |                     |
| Aichi                        | 2002-2003        | 4802           | 8 (2)                        |                            |                                     | 81            |              | <50                 |
| ARIC                         | 1987-1990        | 15488          | 22 (7)                       | 22 (7)                     | 14 (9)                              | 6304          | 418          | 2344                |
| AusDiab                      | 1999-2000        | 10957          | 13 (2)                       |                            | 10 (3)                              | 1362          |              | 62                  |
| Beaver Dam CKD               | 1988-1995        | 4787           | 14 (5)                       |                            | 5 (0)                               | 2052          |              | 75                  |
| Beijing                      | 2004             | 1505           | 6 (1)                        |                            |                                     | 83            |              | <50                 |
| ChinaNS                      | 1994-2008        | 44514          | 6 (2)                        |                            |                                     | 797           |              |                     |
| CHS                          | 1992-1993        | 4574           | 12 (6)                       | 12 (6)                     | 4 (0)                               | 3939          | 65           | 106                 |
| CIRCS                        | 1986-1993        | 11425          | 19 (4)                       |                            | 13 (6)                              | 1413          |              | 509                 |
| COBRA                        | 2004-2005        | 1163           | 7 (3)                        |                            |                                     | 256           |              | <50                 |
| ESTHER                       | 2000-2002        | 9746           | 11 (2)                       |                            | 8 (0)                               | 1538          |              | 484                 |
| Framingham                   | 1979-1986        | 2947           | 10 (2)                       |                            | 8 (3)                               | 300           |              | 114                 |
| Geisinger                    | 1996-2017        | 390614         | 9 (5)                        | 7 (5)                      | 7 (5)                               | 48573         | 3346         | 27935               |
| Gubbio                       | 1988-1992        | 1676           | 17 (3)                       |                            |                                     | 233           |              | <50                 |
| HUNT                         | 1995-1997        | 63852          | 13 (2)                       | 13 (2)                     | 11 (1)                              | 7090          | 98           | 833                 |
| IPHS                         | 1993-2004        | 93397          | 18 (5)                       |                            | 10 (4)                              | 25922         |              | 537                 |
| JHS                          | 2000-2004        | 3463           | 10 (2)                       |                            | 8 (1)                               | 296           |              | 108                 |
| JMS                          | 1992-1995        | 4905           | 12 (2)                       |                            |                                     | 287           |              |                     |
| KHS                          | 1996-2004        | 350556         | 13 (3)                       | 13 (3)                     | 3 (2)                               | 13330         | 1184         | 942                 |
| Maccabi                      | 2006-2012        | 656640         | 6 (2)                        | 6 (2)                      | 6 (2)                               | 33636         | 2325         | 12180               |
| MESA                         | 2000-2002        | 6710           | 8 (2)                        |                            | 5 (1)                               | 501           |              | 142                 |
| MRC                          | 1995-1999        | 11965          | 7 (4)                        |                            |                                     | 7916          |              |                     |
| Mt Sinai BioMe               | 2003-2014        | 23112          | 4 (3)                        | 4 (3)                      | 4 (3)                               |               | 821          | 1544                |
| NHANES                       | 1988-1994        | 58477          | 10 (7)                       |                            |                                     | 7581          |              |                     |
| NIPPON DATA80                | 1980             | 8847           | 24 (8)                       |                            |                                     | 3203          |              |                     |
| NIPPON DATA90                | 1990             | 7219           | 18 (5)                       |                            |                                     | 1651          |              |                     |
| Ohasama                      | 1990-2010        | 1595           | 13 (6)                       |                            |                                     | 326           |              | <50                 |
| Okinawa 83                   | 1983             | 8927           |                              | 17 (1)                     | 10 (0)                              |               | 94           | 754                 |
| Okinawa 93                   | 1993             | 89368          |                              | 7 (0)                      |                                     |               | 160          |                     |
| PREVEND                      | 1997-1998        | 7865           | 11 (3)                       |                            | 10 (3)                              | 768           | <50          | 97                  |
| Rancho Bernardo              | 1992-1997        | 1735           | 13 (6)                       |                            | 8 (3)                               | 758           |              | 66                  |
| RCAV                         | 2004-2012        | 3018133        | 7 (2)                        | 6 (2)                      | 6 (2)                               | 583387        | 9103         | 195158              |
| REGARDS                      | 2003-2007        | 28469          | 11 (3)                       | 8 (2)                      | 9 (1)                               | 6586          | 428          | 2085                |
| RSIII                        | 2006-2008        | 3384           | 8 (2)                        |                            |                                     | 243           |              | <50                 |
| SEED                         | 2004-2012        | 6424           | 5 (2)                        |                            |                                     | 221           | <50          |                     |
| Taiwan MJ                    | 1994-2008        | 473863         | 9 (4)                        |                            | 5 (3)                               | 17577         |              | 354                 |
| Takahata                     | 2004-2006        | 2272           | 9 (1)                        |                            |                                     | 180           |              | <50                 |
| TLGS                         | 1995-2006        | 10212          | 11 (3)                       |                            | 11 (3)                              | 706           |              | 158                 |
| Tromso                       | 1994-2008        | 7762           | 16 (4)                       |                            | 11 (3)                              | 2390          | <50          | 226                 |
| ULSAM                        | 1970-1973        | 1210           | 35 (6)                       |                            | 21 (0)                              | 843           | <50          | 61                  |
| <b>Subtotal</b>              |                  | <b>5459014</b> | <b>8 (3)</b>                 | <b>7 (2)</b>               | <b>6 (3)</b>                        | <b>782329</b> | <b>18042</b> | <b>246874</b>       |
| <b>High CVD Risk Cohorts</b> |                  |                |                              |                            |                                     |               |              |                     |
| ADVANCE                      | 2001-2003        | 11038          | 9 (3)                        | 9 (3)                      | 5 (1)                               | 2242          | 81           | 1284                |
| KP Hawaii                    | 2000-2006        | 29480          | 2 (1)                        | 2 (1)                      | 2 (1)                               | 1288          | 289          | 1450                |
| NZDCS                        | 1999-2006        | 27725          | 9 (3)                        | 9 (3)                      | 2 (1)                               | 7910          | 942          | 179                 |
| Pima                         | 1982-2007        | 4015           | 12 (7)                       | 12 (7)                     | 12 (7)                              | 1060          | 306          | 273                 |
| SMART                        | 1996-2014        | 10485          | 7 (4)                        | 7 (4)                      |                                     | 1338          | 66           |                     |

|                    |           |                |              |              |              |               |              |               |
|--------------------|-----------|----------------|--------------|--------------|--------------|---------------|--------------|---------------|
| ZODIAC             | 1998-2002 | 1674           | 10 (4)       |              | 8 (3)        | 808           |              | 158           |
| <b>Subtotal</b>    |           | <b>84417</b>   | <b>6 (3)</b> | <b>6 (3)</b> | <b>3 (2)</b> | <b>14646</b>  | <b>1684</b>  | <b>3344</b>   |
| <b>CKD Cohorts</b> |           |                |              |              |              |               |              |               |
| AASK               | 1995-1998 | 1087           | 8 (3)        | 7 (3)        | 6 (4)        | 211           | 298          | 525           |
| BC CKD             | 2003-2012 | 7646           | 7 (3)        | 4 (3)        | 4 (3)        | 2909          | 2673         | 3221          |
| CanPREDDICT        | 2008      | 1643           | 3 (1)        | 3 (2)        | 3 (1)        | 381           | 381          | 619           |
| CARE FOR HOME      | 2008-2015 | 462            | 4 (2)        |              |              | 63            | <50          | <50           |
| CCF                | 2005-2009 | 36018          | 2 (1)        | 2 (1)        | 2 (1)        | 5455          | 995          | 1669          |
| CKD-JAC            | 2007-2009 | 2478           | 4 (2)        | 4 (2)        | 3 (1)        | 73            | 502          | 1075          |
| CRIB               | 1996-1998 | 369            | 6 (3)        | 4 (3)        | 3 (1)        | 141           | 184          | 137           |
| GCKD               | 2009-2012 | 5050           | 2 (0)        | 2 (0)        | 2 (0)        | 157           | 71           | 238           |
| Gonryo             | 2006-2008 | 3352           | 4 (2)        | 4 (2)        | 4 (2)        | 126           | 336          | 453           |
| MASTERPLAN         | 2004-2006 | 671            | 5 (1)        | 4 (1)        | 4 (1)        | 118           | 148          | 192           |
| MDRD               | 1989-1991 | 1771           | 16 (6)       | 9 (7)        | 2 (1)        | 819           | 1136         | 272           |
| MMKD               | 1997-1998 | 198            |              | 4 (2)        |              | <50           | 74           | <50           |
| Nefrona            | 2009-2011 | 1751           | 4 (1)        | 2 (0)        | 2 (0)        | 103           | 130          | 96            |
| NephroTest         | 2000-2013 | 1891           | 6 (3)        | 5 (3)        | 4 (2)        | 364           | 448          | 234           |
| PSP-CKD            | 2010-2013 | 20429          | 4 (2)        | 4 (2)        | 2 (1)        | 4707          | 204          | 271           |
| RENAAL             | 1996-1998 | 1468           | 3 (1)        | 3 (1)        | 2 (1)        | 304           | 330          | 852           |
| SRR-CKD            | 2005-2012 | 2463           | 3 (2)        | 3 (2)        | 2 (1)        | 690           | 669          | 285           |
| Sunnybrook         | 2000      | 2860           | 3 (2)        | 3 (2)        | 2 (2)        | 695           | 340          | 460           |
| <b>Subtotal</b>    |           | <b>91607</b>   | <b>4 (2)</b> | <b>3 (2)</b> | <b>2 (1)</b> | <b>17316</b>  | <b>8919</b>  | <b>10599</b>  |
| <b>Total</b>       |           | <b>5635038</b> | <b>8 (3)</b> | <b>7 (2)</b> | <b>6 (3)</b> | <b>814291</b> | <b>28645</b> | <b>260817</b> |

CKD: chronic kidney disease; CVD: cardiovascular disease; eGFR: estimated glomerular filtration rate; ESKD: end-stage kidney disease

Cohorts with <50 events for an outcome were not included in analyses for that outcome.

\*Total N reflects the number of participants at risk for death in all cohorts except in MESA it represents number of participants at risk for death or GFR decline and in Mt Sinai it represents the number of participants at risk for ESKD or GFR decline.

†GFR decline defined as eGFR decline  $\geq 40\%$ , initiation of kidney replacement therapy or eGFR  $< 10$  mL/min/1.73 m<sup>2</sup>.

**eTable 2. Summary Baseline Characteristics by BMI Category**

| <b>General Population Cohorts</b> |                        |                     |                     |              |               |
|-----------------------------------|------------------------|---------------------|---------------------|--------------|---------------|
|                                   | <b>18.5--to &lt;25</b> | <b>25 to &lt;30</b> | <b>30 to &lt;35</b> | <b>≥35</b>   | <b>Total</b>  |
| n                                 | 1837795                | 1958101             | 1055261             | 607857       | 5459014       |
| Age, years                        | 51 (15)                | 57 (14)             | 57 (13)             | 55 (13)      | 55 (14)       |
| Female                            | 705942 (38%)           | 415334 (21%)        | 199411 (19%)        | 150168 (25%) | 1470855 (27%) |
| Black                             | 137038 (7%)            | 201712 (10%)        | 141229 (13%)        | 87869 (14%)  | 567848 (10%)  |
| Asian                             | 757467 (41%)           | 314566 (16%)        | 36442 (3%)          | 4330 (1%)    | 1112805 (20%) |
| Current smoking                   | 200241 (11%)           | 116930 (6%)         | 35394 (3%)          | 22490 (4%)   | 375055 (7%)   |
| Systolic blood pressure (mmHg)    | 124 (18)               | 131 (18)            | 134 (17)            | 136 (17)     | 130 (18)      |
| Cholesterol (mmol/L)              | 4.89 (1.02)            | 4.98 (1.07)         | 4.97 (1.11)         | 4.91 (1.09)  | 4.95 (1.07)   |
| Diabetes                          | 142016 (8%)            | 320314 (16%)        | 280521 (27%)        | 229211 (38%) | 972062 (18%)  |
| History of CVD                    | 168230 (9%)            | 277506 (14%)        | 175473 (17%)        | 106849 (18%) | 728058 (13%)  |
| eGFR (ml/min/1.73m <sup>2</sup> ) | 89 (18)                | 85 (17)             | 85 (17)             | 87 (18)      | 86 (17)       |
| ACR > 30 mg/g                     | 41588 (6%)             | 34388 (9%)          | 17873 (16%)         | 13772 (24%)  | 107621 (8%)   |
| Waist Circumference (cm)          | 75 (12)                | 87 (12)             | 99 (12)             | 113 (14)     | 80 (14)       |
| Waist Height Ratio                | 0.46 (0.13)            | 0.53 (0.15)         | 0.60 (0.07)         | 0.69 (0.08)  | 0.49 (0.14)   |
| <b>High CVD Risk Cohorts</b>      |                        |                     |                     |              |               |
| n                                 | 19049                  | 29495               | 19559               | 16314        | 84417         |
| Age, years                        | 63 (14)                | 62 (13)             | 59 (12)             | 53 (12)      | 60 (13)       |
| Female                            | 9553 (50%)             | 12021 (41%)         | 9076 (46%)          | 9436 (58%)   | 40086 (47%)   |
| Black                             | 21 (0%)                | 41 (0%)             | 25 (0%)             | 20 (0%)      | 107 (0%)      |
| Asian                             | 2708 (14%)             | 2524 (9%)           | 576 (3%)            | 136 (1%)     | 5944 (7%)     |
| Current smoking                   | 2529 (13%)             | 3508 (12%)          | 2083 (11%)          | 1714 (11%)   | 9834 (12%)    |
| Systolic blood pressure (mmHg)    | 135 (21)               | 138 (20)            | 138 (20)            | 137 (20)     | 137 (20)      |
| Cholesterol (mmol/L)              | 5.10 (1.22)            | 5.12 (1.22)         | 5.17 (1.22)         | 5.15 (1.18)  | 5.13 (1.21)   |
| Diabetes                          | 11297 (59%)            | 20248 (69%)         | 14919 (76%)         | 12730 (78%)  | 59194 (70%)   |
| History of CVD                    | 4959 (26%)             | 8147 (28%)          | 4455 (23%)          | 2747 (17%)   | 20308 (24%)   |
| eGFR (ml/min/1.73m <sup>2</sup> ) | 77 (22)                | 77 (21)             | 79 (22)             | 85 (23)      | 79 (22)       |
| <b>CKD Cohorts</b>                |                        |                     |                     |              |               |
| n                                 | 26502                  | 33654               | 19061               | 12390        | 91607         |
| Age, years                        | 69 (13)                | 70 (11)             | 69 (11)             | 66 (11)      | 69 (12)       |
| Female                            | 14131 (53%)            | 14662 (44%)         | 9183 (48%)          | 7661 (62%)   | 45637 (50%)   |
| Black                             | 1335 (5%)              | 2125 (6%)           | 1517 (8%)           | 1400 (11%)   | 6377 (7%)     |
| Asian                             | 4877 (18%)             | 2520 (7%)           | 619 (3%)            | 166 (1%)     | 8182 (9%)     |
| Current smoking                   | 2811 (11%)             | 2833 (8%)           | 1588 (8%)           | 965 (8%)     | 8197 (9%)     |
| Systolic blood pressure (mmHg)    | 132 (20)               | 134 (19)            | 135 (19)            | 136 (19)     | 134 (19)      |
| Cholesterol (mmol/L)              | 4.85 (1.19)            | 4.77 (1.25)         | 4.75 (1.19)         | 4.75 (1.23)  | 4.78 (1.22)   |
| Diabetes                          | 5604 (21%)             | 9316 (28%)          | 7008 (37%)          | 5990 (48%)   | 27918 (30%)   |
| History of CVD                    | 6160 (23%)             | 9041 (27%)          | 5285 (28%)          | 3368 (27%)   | 23854 (26%)   |
| eGFR (ml/min/1.73m <sup>2</sup> ) | 47 (18)                | 46 (15)             | 46 (14)             | 46 (14)      | 46 (16)       |
| ACR > 30 mg/g                     | 8483 (58%)             | 11314 (62%)         | 6650 (62%)          | 4229 (60%)   | 30676 (61%)   |



|                                 |                    |                    |                    |                    |                    |
|---------------------------------|--------------------|--------------------|--------------------|--------------------|--------------------|
| <b>Waist Circumference (cm)</b> | <b>83 (8)</b>      | <b>98 (8)</b>      | <b>109 (9)</b>     | <b>122 (11)</b>    | <b>98 (14)</b>     |
| <b>Waist Height Ratio</b>       | <b>0.50 (0.05)</b> | <b>0.58 (0.05)</b> | <b>0.65 (0.05)</b> | <b>0.73 (0.06)</b> | <b>0.59 (0.08)</b> |

**eTable 3. Baseline Characteristics by BMI Category – Demographics**

|                           | N            |        |        |       | Age          |            |            |            | Female         |                |                |                | Black        |               |               |                | Asian           |                 |                |               | Current Smoking |                |                |                |
|---------------------------|--------------|--------|--------|-------|--------------|------------|------------|------------|----------------|----------------|----------------|----------------|--------------|---------------|---------------|----------------|-----------------|-----------------|----------------|---------------|-----------------|----------------|----------------|----------------|
|                           | 18.5-<br><25 | 25-<30 | 30-<35 | ≥35   | 18.5-<br><25 | 25-<30     | 30-<35     | ≥35        | 18.5-<br><25   | 25-<30         | 30-<35         | ≥35            | 18.5-<br><25 | 25-<30        | 30-<35        | ≥35            | 18.5-<br><25    | 25-<30          | 30-<35         | ≥35           | 18.5-<br><25    | 25-<30         | 30-<35         | ≥35            |
| <b>General Population</b> |              |        |        |       |              |            |            |            |                |                |                |                |              |               |               |                |                 |                 |                |               |                 |                |                |                |
| Aichi                     | 3698         | 1043   | 55     | 6     | 49<br>(7)    | 50<br>(7)  | 48<br>(7)  | 44<br>(4)  | 832<br>(22%)   | 119<br>(11%)   | 7<br>(13%)     | 0 (0%)         | 0 (0%)       | 0 (0%)        | 0 (0%)        | 3698<br>(100%) | 1043<br>(100%)  | 55<br>(100%)    | 6<br>(100%)    | 1039 (29%)    | 326<br>(32%)    | 21<br>(40%)    | 0<br>(0%)      |                |
| ARIC                      | 5042         | 6163   | 2875   | 1408  | 55<br>(6)    | 55<br>(6)  | 55<br>(6)  | 54<br>(6)  | 3132<br>(62%)  | 2725<br>(44%)  | 1569<br>(55%)  | 1070<br>(76%)  | 864<br>(17%) | 1549<br>(25%) | 1007<br>(35%) | 662<br>(47%)   | 17<br>(0%)      | 12<br>(0%)      | 2 (0%)         | 1 (0%)        | 1655 (33%)      | 1500<br>(24%)  | 616<br>(21%)   | 222<br>(16%)   |
| AusDiab                   | 4051         | 4436   | 1737   | 733   | 50<br>(15)   | 54<br>(14) | 54<br>(13) | 51<br>(13) | 2584<br>(64%)  | 1974<br>(44%)  | 907<br>(52%)   | 523<br>(71%)   | 0 (0%)       | 0 (0%)        | 0 (0%)        | 0 (0%)         | 0 (0%)          | 0 (0%)          | 0 (0%)         | 0 (0%)        | 687 (17%)       | 647<br>(15%)   | 265<br>(16%)   | 90<br>(13%)    |
| Beaver Dam<br>CKD         | 1340         | 1984   | 1002   | 461   | 63<br>(12)   | 63<br>(11) | 62<br>(11) | 60<br>(10) | 924<br>(69%)   | 943<br>(48%)   | 496<br>(50%)   | 304<br>(66%)   | 0 (0%)       | 0 (0%)        | 0 (0%)        | 1 (0%)         | 7 (1%)          | 4 (0%)          | 0 (0%)         | 1 (0%)        | 359 (27%)       | 376<br>(19%)   | 141<br>(14%)   | 63<br>(14%)    |
| Beijing                   | 715          | 651    | 131    | 8     | 60<br>(10)   | 60<br>(10) | 62<br>(9)  | 55<br>(8)  | 367<br>(51%)   | 310<br>(48%)   | 74<br>(56%)    | 6<br>(75%)     | 0 (0%)       | 0 (0%)        | 0 (0%)        | 0 (0%)         | 715<br>(100%)   | 651<br>(100%)   | 131<br>(100%)  | 8<br>(100%)   | 175 (24%)       | 148<br>(23%)   | 26<br>(20%)    | 2<br>(25%)     |
| ChinaNS                   | 28071        | 13874  | 2285   | 284   | 46<br>(15)   | 50<br>(13) | 50<br>(14) | 48<br>(15) | 16244<br>(58%) | 7549<br>(54%)  | 1341<br>(59%)  | 195<br>(69%)   | 0 (0%)       | 0 (0%)        | 0 (0%)        | 0 (0%)         | 28071<br>(100%) | 13874<br>(100%) | 2285<br>(100%) | 284<br>(100%) | 6525 (23%)      | 3486<br>(25%)  | 548<br>(24%)   | 54<br>(19%)    |
| CHS                       | 1659         | 1939   | 707    | 269   | 76<br>(6)    | 75<br>(5)  | 74<br>(5)  | 73<br>(4)  | 980<br>(59%)   | 997<br>(51%)   | 446<br>(63%)   | 214<br>(80%)   | 192<br>(12%) | 327<br>(17%)  | 169<br>(24%)  | 103<br>(38%)   | 1 (0%)          | 2 (0%)          | 0 (0%)         | 0 (0%)        | 213 (13%)       | 152<br>(8%)    | 52<br>(7%)     | 13<br>(5%)     |
| CIRCS                     | 8176         | 2901   | 326    | 22    | 54<br>(9)    | 55<br>(8)  | 55<br>(9)  | 55<br>(9)  | 4890<br>(60%)  | 1798<br>(62%)  | 244<br>(75%)   | 20<br>(91%)    | 0 (0%)       | 0 (0%)        | 0 (0%)        | 0 (0%)         | 8176<br>(100%)  | 2901<br>(100%)  | 326<br>(100%)  | 22<br>(100%)  | 2259 (28%)      | 637<br>(22%)   | 58<br>(18%)    | 4<br>(18%)     |
| COBRA                     | 440          | 429    | 191    | 103   | 56<br>(12)   | 53<br>(10) | 51<br>(9)  | 49<br>(9)  | 223<br>(51%)   | 263<br>(61%)   | 145<br>(76%)   | 91<br>(88%)    | 0 (0%)       | 0 (0%)        | 0 (0%)        | 0 (0%)         | 440<br>(100%)   | 429<br>(100%)   | 191<br>(100%)  | 103<br>(100%) | 164 (37%)       | 141<br>(33%)   | 49<br>(26%)    | 27<br>(26%)    |
| ESTHER                    | 2635         | 4603   | 1927   | 581   | 62<br>(7)    | 62<br>(7)  | 62<br>(6)  | 61<br>(7)  | 1676<br>(64%)  | 2261<br>(49%)  | 1050<br>(54%)  | 366<br>(63%)   | 0 (0%)       | 0 (0%)        | 0 (0%)        | 0 (0%)         | 0 (0%)          | 0 (0%)          | 0 (0%)         | 0 (0%)        | 567 (22%)       | 642<br>(14%)   | 242<br>(13%)   | 67<br>(12%)    |
| Framingham                | 880          | 1248   | 571    | 248   | 59<br>(10)   | 59<br>(10) | 60<br>(9)  | 57<br>(9)  | 612<br>(70%)   | 560<br>(45%)   | 251<br>(44%)   | 143<br>(58%)   | 0 (0%)       | 0 (0%)        | 0 (0%)        | 0 (0%)         | 0 (0%)          | 0 (0%)          | 0 (0%)         | 0 (0%)        | 150 (17%)       | 169<br>(14%)   | 91<br>(16%)    | 33<br>(13%)    |
| Geisinger                 | 92279        | 119063 | 89851  | 89421 | 44<br>(19)   | 50<br>(18) | 51<br>(17) | 48<br>(16) | 61056<br>(66%) | 59591<br>(50%) | 44869<br>(50%) | 55243<br>(62%) | 2156<br>(2%) | 2835<br>(2%)  | 2430<br>(3%)  | 2707<br>(3%)   | 1228<br>(1%)    | 829<br>(1%)     | 284<br>(0%)    | 108<br>(0%)   | 24931<br>(27%)  | 26301<br>(22%) | 18040<br>(20%) | 16934<br>(19%) |
| Gubbio                    | 404          | 796    | 380    | 96    | 54<br>(6)    | 54<br>(6)  | 55<br>(6)  | 55<br>(6)  | 249<br>(62%)   | 392<br>(49%)   | 212<br>(56%)   | 73<br>(76%)    | 0 (0%)       | 0 (0%)        | 0 (0%)        | 0 (0%)         | 0 (0%)          | 0 (0%)          | 0 (0%)         | 0 (0%)        | 158 (39%)       | 253<br>(32%)   | 87<br>(23%)    | 23<br>(24%)    |
| HUNT                      | 25632        | 27599  | 8446   | 2175  | 46<br>(17)   | 52<br>(16) | 55<br>(16) | 54<br>(16) | 14939<br>(58%) | 12501<br>(45%) | 4713<br>(56%)  | 1598<br>(73%)  | 0 (0%)       | 0 (0%)        | 0 (0%)        | 0 (0%)         | 0 (0%)          | 0 (0%)          | 0 (0%)         | 0 (0%)        | 8859 (35%)      | 7240<br>(26%)  | 1932<br>(23%)  | 455<br>(21%)   |
| IPHS                      | 64358        | 26305  | 2543   | 191   | 59<br>(11)   | 60<br>(10) | 59<br>(10) | 57<br>(10) | 41774<br>(65%) | 17651<br>(67%) | 1999<br>(79%)  | 168<br>(88%)   | 0 (0%)       | 0 (0%)        | 0 (0%)        | 0 (0%)         | 64358<br>(100%) | 26305<br>(100%) | 2543<br>(100%) | 191<br>(100%) | 13224<br>(21%)  | 4405<br>(17%)  | 388<br>(15%)   | 23<br>(12%)    |

|                    |        |         |        |        |            |            |            |            |                 |                 |                |                |                 |                 |                 |                |                  |                  |                |               |                |                |               |               |
|--------------------|--------|---------|--------|--------|------------|------------|------------|------------|-----------------|-----------------|----------------|----------------|-----------------|-----------------|-----------------|----------------|------------------|------------------|----------------|---------------|----------------|----------------|---------------|---------------|
| JHS                | 489    | 1074    | 922    | 978    | 50<br>(14) | 51<br>(12) | 51<br>(11) | 49<br>(11) | 256<br>(52%)    | 555<br>(52%)    | 572<br>(62%)   | 746<br>(76%)   | 489<br>(100%)   | 1074<br>(100%)  | 922<br>(100%)   | 978<br>(100%)  | 0 (0%)           | 0 (0%)           | 0 (0%)         | 0 (0%)        | 111 (23%)      | 156<br>(15%)   | 113<br>(12%)  | 108<br>(11%)  |
| JMS                | 3741   | 1060    | 100    | 4      | 54<br>(11) | 56<br>(10) | 55<br>(10) | 54<br>(11) | 2339<br>(63%)   | 704<br>(66%)    | 73<br>(73%)    | 3<br>(75%)     | 0 (0%)          | 0 (0%)          | 0 (0%)          | 0 (0%)         | 3741<br>(100%)   | 1060<br>(100%)   | 100<br>(100%)  | 4<br>(100%)   | 850 (23%)      | 206<br>(19%)   | 17<br>(17%)   | 0<br>(0%)     |
| KHS                | 233940 | 108088  | 8020   | 508    | 46<br>(10) | 47<br>(10) | 46<br>(10) | 46<br>(11) | 94399<br>(40%)  | 32373<br>(30%)  | 3385<br>(42%)  | 280<br>(55%)   | 0 (0%)          | 0 (0%)          | 0 (0%)          | 0 (0%)         | 233940<br>(100%) | 108088<br>(100%) | 8020<br>(100%) | 508<br>(100%) | 57190<br>(31%) | 27396<br>(32%) | 1926<br>(30%) | 88<br>(21%)   |
| Maccabi            | 231926 | 240646  | 123905 | 60163  | 44<br>(16) | 51<br>(16) | 52<br>(15) | 51<br>(15) | 151710<br>(65%) | 115532<br>(48%) | 65412<br>(53%) | 39016<br>(65%) | 0 (0%)          | 0 (0%)          | 0 (0%)          | 0 (0%)         | 0 (0%)           | 0 (0%)           | 0 (0%)         | 0 (0%)        | 4793 (2%)      | 5153<br>(2%)   | 2520<br>(2%)  | 1135<br>(2%)  |
| MESA               | 1882   | 2653    | 1418   | 757    | 63<br>(11) | 63<br>(10) | 62<br>(10) | 60<br>(9)  | 1047<br>(56%)   | 1212<br>(46%)   | 726<br>(51%)   | 553<br>(73%)   | 317<br>(17%)    | 694<br>(26%)    | 503<br>(35%)    | 347<br>(46%)   | 491<br>(26%)     | 246<br>(9%)      | 32<br>(2%)     | 2 (0%)        | 276 (15%)      | 418<br>(16%)   | 216<br>(15%)  | 92<br>(12%)   |
| MRC                | 4891   | 5045    | 1621   | 408    | 82<br>(5)  | 81<br>(4)  | 80<br>(4)  | 80<br>(4)  | 3017<br>(62%)   | 2823<br>(56%)   | 1051<br>(65%)  | 324<br>(79%)   | 0 (0%)          | 0 (0%)          | 0 (0%)          | 0 (0%)         | 0 (0%)           | 0 (0%)           | 0 (0%)         | 0 (0%)        | 671 (14%)      | 491<br>(10%)   | 143<br>(9%)   | 28<br>(7%)    |
| Mt Sinai BioMe     | 6973   | 7524    | 4591   | 4024   | 49<br>(17) | 53<br>(15) | 53<br>(14) | 50<br>(14) | 4144<br>(59%)   | 3950<br>(52%)   | 2847<br>(62%)  | 2946<br>(73%)  | 1378<br>(20%)   | 1794<br>(24%)   | 1352<br>(29%)   | 1572<br>(39%)  | 330<br>(5%)      | 168<br>(2%)      | 40<br>(1%)     | 19<br>(0%)    | 910 (14%)      | 1067<br>(15%)  | 721<br>(17%)  | 603<br>(16%)  |
| NHANES             | 20023  | 19980   | 10915  | 7559   | 42<br>(21) | 49<br>(20) | 49<br>(18) | 46<br>(17) | 10494<br>(52%)  | 8991<br>(45%)   | 5744<br>(53%)  | 4955<br>(66%)  | 4171<br>(21%)   | 3973<br>(20%)   | 2613<br>(24%)   | 2435<br>(32%)  | 0 (0%)           | 0 (0%)           | 0 (0%)         | 0 (0%)        | 3868 (22%)     | 3182<br>(17%)  | 1651<br>(16%) | 1074<br>(15%) |
| NIPPON<br>DATA80   | 6841   | 1810    | 181    | 15     | 50<br>(13) | 50<br>(12) | 53<br>(12) | 43<br>(8)  | 3734<br>(55%)   | 1048<br>(58%)   | 146<br>(81%)   | 14<br>(93%)    | 0 (0%)          | 0 (0%)          | 0 (0%)          | 0 (0%)         | 6841<br>(100%)   | 1810<br>(100%)   | 181<br>(100%)  | 15<br>(100%)  | 2298 (34%)     | 518<br>(29%)   | 25<br>(14%)   | 1<br>(7%)     |
| NIPPON<br>DATA90   | 5379   | 1653    | 168    | 19     | 52<br>(14) | 54<br>(13) | 53<br>(13) | 52<br>(11) | 3126<br>(58%)   | 939<br>(57%)    | 116<br>(69%)   | 13<br>(68%)    | 0 (0%)          | 0 (0%)          | 0 (0%)          | 0 (0%)         | 5379<br>(100%)   | 1653<br>(100%)   | 168<br>(100%)  | 19<br>(100%)  | 1520 (28%)     | 476<br>(29%)   | 40<br>(24%)   | 4<br>(21%)    |
| Ohasama            | 1105   | 445     | 37     | 8      | 64<br>(10) | 63<br>(9)  | 61<br>(10) | 61<br>(12) | 643<br>(58%)    | 277<br>(62%)    | 28<br>(76%)    | 5<br>(63%)     | 0 (0%)          | 0 (0%)          | 0 (0%)          | 0 (0%)         | 1105<br>(100%)   | 445<br>(100%)    | 37<br>(100%)   | 8<br>(100%)   | 193 (18%)      | 53<br>(12%)    | 1<br>(3%)     | 2<br>(25%)    |
| Okinawa 83         | 5824   | 2655    | 411    | 37     | 51<br>(16) | 52<br>(13) | 52<br>(14) | 51<br>(15) | 3449<br>(59%)   | 1565<br>(59%)   | 285<br>(69%)   | 30<br>(81%)    | 0 (0%)          | 0 (0%)          | 0 (0%)          | 0 (0%)         | 5824<br>(100%)   | 2655<br>(100%)   | 411<br>(100%)  | 37<br>(100%)  | 0 (0%)         | 0 (0%)         | 0 (0%)        | 0 (0%)        |
| Okinawa 93         | 55560  | 29433   | 3987   | 388    | 54<br>(16) | 56<br>(13) | 54<br>(13) | 50<br>(13) | 32111<br>(58%)  | 16160<br>(55%)  | 2513<br>(63%)  | 264<br>(68%)   | 0 (0%)          | 0 (0%)          | 0 (0%)          | 0 (0%)         | 55560<br>(100%)  | 29433<br>(100%)  | 3987<br>(100%) | 388<br>(100%) |                |                |               |               |
| PREVEND            | 3398   | 3231    | 961    | 275    | 46<br>(12) | 53<br>(13) | 54<br>(12) | 53<br>(12) | 1900<br>(56%)   | 1360<br>(42%)   | 481<br>(50%)   | 195<br>(71%)   | 25<br>(1%)      | 28<br>(1%)      | 14<br>(1%)      | 9 (3%)         | 69<br>(2%)       | 65<br>(2%)       | 25<br>(3%)     | 2 (1%)        | 1359 (40%)     | 951<br>(29%)   | 264<br>(27%)  | 72<br>(26%)   |
| Rancho<br>Bernardo | 881    | 656     | 150    | 48     | 72<br>(12) | 71<br>(11) | 69<br>(11) | 67<br>(10) | 618<br>(70%)    | 323<br>(49%)    | 82<br>(55%)    | 29<br>(60%)    | 1 (0%)          | 0 (0%)          | 0 (0%)          | 0 (0%)         | 5 (1%)           | 3 (0%)           | 0 (0%)         | 0 (0%)        | 68 (8%)        | 36<br>(6%)     | 12<br>(8%)    | 5<br>(10%)    |
| RCAV               | 659151 | 1173855 | 756831 | 428296 | 61<br>(15) | 61<br>(14) | 59<br>(13) | 57<br>(11) | 49457<br>(8%)   | 57809<br>(5%)   | 42946<br>(6%)  | 35369<br>(8%)  | 125403<br>(19%) | 185489<br>(16%) | 129220<br>(17%) | 76338<br>(18%) | 0 (0%)           | 0 (0%)           | 0 (0%)         | 0 (0%)        |                |                |               |               |
| REGARDS            | 6801   | 10644   | 6380   | 4644   | 67<br>(10) | 66<br>(9)  | 65<br>(9)  | 62<br>(8)  | 3784<br>(56%)   | 4961<br>(47%)   | 3534<br>(55%)  | 3252<br>(70%)  | 2031<br>(30%)   | 3926<br>(37%)   | 2989<br>(47%)   | 2711<br>(58%)  | 0 (0%)           | 0 (0%)           | 0 (0%)         | 0 (0%)        | 1317 (19%)     | 1427<br>(13%)  | 784<br>(12%)  | 516<br>(11%)  |

|                              |                |                |                |               |                    |                    |                    |                    |                         |                         |                         |                         |                        |                         |                         |                        |                         |                         |                       |                      |                         |                        |                       |                       |
|------------------------------|----------------|----------------|----------------|---------------|--------------------|--------------------|--------------------|--------------------|-------------------------|-------------------------|-------------------------|-------------------------|------------------------|-------------------------|-------------------------|------------------------|-------------------------|-------------------------|-----------------------|----------------------|-------------------------|------------------------|-----------------------|-----------------------|
| RSIII                        | 981            | 1555           | 607            | 241           | 56<br>(7)          | 57<br>(6)          | 58<br>(7)          | 57<br>(7)          | 636<br>(65%)            | 783<br>(50%)            | 334<br>(55%)            | 158<br>(66%)            | 11<br>(1%)             | 23<br>(1%)              | 10<br>(2%)              | 6 (2%)                 | 0 (0%)                  | 0 (0%)                  | 0 (0%)                | 0 (0%)               | 308 (31%)               | 405<br>(26%)           | 138<br>(23%)          | 56<br>(23%)           |
| SEED                         | 3364           | 2248           | 628            | 184           | 59<br>(10)         | 58<br>(9)          | 57<br>(10)         | 55<br>(9)          | 1553<br>(46%)           | 1025<br>(46%)           | 392<br>(62%)            | 138<br>(75%)            | 0 (0%)                 | 0 (0%)                  | 0 (0%)                  | 0 (0%)                 | 3364<br>(100%)          | 2248<br>(100%)          | 628<br>(100%)         | 184<br>(100%)        | 1009 (30%)              | 628<br>(28%)           | 137<br>(22%)          | 31<br>(17%)           |
| Taiwan MJ                    | 333042         | 120874         | 17370          | 2577          | 40<br>(14)         | 46<br>(14)         | 45<br>(14)         | 40<br>(14)         | 180363<br>(54%)         | 48243<br>(40%)          | 8386<br>(48%)           | 1308<br>(51%)           | 0 (0%)                 | 0 (0%)                  | 0 (0%)                  | 0 (0%)                 | 333042<br>(100%)        | 120874<br>(100%)        | 17370<br>(100%)       | 2577<br>(100%)       | 59935<br>(22%)          | 26089<br>(28%)         | 3686<br>(27%)         | 596<br>(29%)          |
| Takahata                     | 1524           | 661            | 83             | 4             | 63<br>(10)         | 64<br>(9)          | 62<br>(11)         | 58<br>(18)         | 846<br>(56%)            | 355<br>(54%)            | 63<br>(76%)             | 4<br>(100%)             | 0 (0%)                 | 0 (0%)                  | 0 (0%)                  | 0 (0%)                 | 1524<br>(100%)          | 661<br>(100%)           | 83<br>(100%)          | 4<br>(100%)          | 284 (19%)               | 96<br>(15%)            | 9<br>(11%)            | 0<br>(0%)             |
| TLGS                         | 3770           | 4138           | 1812           | 492           | 37<br>(16)         | 44<br>(15)         | 46<br>(13)         | 47<br>(13)         | 1874<br>(50%)           | 2208<br>(53%)           | 1240<br>(68%)           | 396<br>(80%)            | 0 (0%)                 | 0 (0%)                  | 0 (0%)                  | 0 (0%)                 | 0 (0%)                  | 0 (0%)                  | 0 (0%)                | 0 (0%)               | 648 (17%)               | 626<br>(15%)           | 202<br>(11%)          | 41<br>(8%)            |
| Tromso                       | 3365           | 3288           | 917            | 192           | 58<br>(11)         | 60<br>(9)          | 61<br>(9)          | 62<br>(9)          | 2090<br>(62%)           | 1616<br>(49%)           | 591<br>(64%)            | 138<br>(72%)            | 0 (0%)                 | 0 (0%)                  | 0 (0%)                  | 0 (0%)                 | 0 (0%)                  | 0 (0%)                  | 0 (0%)                | 0 (0%)               | 1357 (40%)              | 933<br>(28%)           | 211<br>(23%)          | 26<br>(14%)           |
| ULSAM                        | 659            | 496            | 48             | 7             | 50<br>(1)          | 50<br>(1)          | 50<br>(1)          | 50<br>(0)          | 0 (0%)                  | 0 (0%)                  | 0 (0%)                  | 0 (0%)                  | 0 (0%)                 | 0 (0%)                  | 0 (0%)                  | 0 (0%)                 | 0 (0%)                  | 0 (0%)                  | 0 (0%)                | 0 (0%)               | 311 (47%)               | 200<br>(40%)           | 22<br>(46%)           | 2<br>(29%)            |
| <b>Subtotal</b>              | <b>1837795</b> | <b>1958101</b> | <b>1055261</b> | <b>607857</b> | <b>51<br/>(15)</b> | <b>57<br/>(14)</b> | <b>57<br/>(13)</b> | <b>55<br/>(13)</b> | <b>705942<br/>(38%)</b> | <b>415334<br/>(21%)</b> | <b>199411<br/>(19%)</b> | <b>150168<br/>(25%)</b> | <b>137038<br/>(7%)</b> | <b>201712<br/>(10%)</b> | <b>141229<br/>(13%)</b> | <b>87869<br/>(14%)</b> | <b>757467<br/>(41%)</b> | <b>314566<br/>(16%)</b> | <b>36442<br/>(3%)</b> | <b>4330<br/>(1%)</b> | <b>200241<br/>(11%)</b> | <b>116930<br/>(6%)</b> | <b>35394<br/>(3%)</b> | <b>22490<br/>(4%)</b> |
| <b>High CVD Risk Cohorts</b> |                |                |                |               |                    |                    |                    |                    |                         |                         |                         |                         |                        |                         |                         |                        |                         |                         |                       |                      |                         |                        |                       |                       |
| ADVANCE                      | 2987           | 4538           | 2404           | 1109          | 66<br>(6)          | 67<br>(6)          | 66<br>(6)          | 65<br>(6)          | 1269<br>(42%)           | 1729<br>(38%)           | 1074<br>(45%)           | 615<br>(55%)            | 4 (0%)                 | 17<br>(0%)              | 11<br>(0%)              | 5 (0%)                 | 2069<br>(69%)           | 1763<br>(39%)           | 317<br>(13%)          | 40<br>(4%)           | 464 (16%)               | 681<br>(15%)           | 324<br>(14%)          | 191<br>(17%)          |
| KP Hawaii                    | 6933           | 9336           | 6645           | 6566          | 66<br>(15)         | 62<br>(14)         | 58<br>(13)         | 53<br>(13)         | 4150<br>(60%)           | 4326<br>(46%)           | 3083<br>(46%)           | 3484<br>(53%)           | 0 (0%)                 | 0 (0%)                  | 0 (0%)                  | 0 (0%)                 | 0 (0%)                  | 0 (0%)                  | 0 (0%)                | 0 (0%)               |                         |                        |                       |                       |
| NZDCS                        | 4600           | 9139           | 7437           | 6549          | 65<br>(17)         | 64<br>(14)         | 61<br>(13)         | 55<br>(13)         | 2260<br>(49%)           | 3840<br>(42%)           | 3494<br>(47%)           | 4007<br>(61%)           | 17<br>(0%)             | 24<br>(0%)              | 14<br>(0%)              | 15<br>(0%)             | 639<br>(14%)            | 761<br>(8%)             | 259<br>(3%)           | 96<br>(1%)           | 669 (15%)               | 1203<br>(13%)          | 1060<br>(14%)         | 1132<br>(17%)         |
| Pima                         | 550            | 1029           | 1070           | 1366          | 32<br>(17)         | 36<br>(16)         | 34<br>(14)         | 31<br>(12)         | 292<br>(53%)            | 549<br>(53%)            | 602<br>(56%)            | 913<br>(67%)            | 0 (0%)                 | 0 (0%)                  | 0 (0%)                  | 0 (0%)                 | 0 (0%)                  | 0 (0%)                  | 0 (0%)                | 0 (0%)               | 114 (29%)               | 209<br>(28%)           | 211<br>(30%)          | 219<br>(26%)          |
| SMART                        | 3663           | 4742           | 1556           | 524           | 57<br>(14)         | 59<br>(11)         | 57<br>(11)         | 53<br>(12)         | 1432<br>(39%)           | 1230<br>(26%)           | 541<br>(35%)            | 265<br>(51%)            | 0 (0%)                 | 0 (0%)                  | 0 (0%)                  | 0 (0%)                 | 0 (0%)                  | 0 (0%)                  | 0 (0%)                | 0 (0%)               | 1211 (33%)              | 1272<br>(27%)          | 411<br>(27%)          | 146<br>(28%)          |
| ZODIAC                       | 316            | 711            | 447            | 200           | 71<br>(12)         | 67<br>(12)         | 66<br>(11)         | 64<br>(12)         | 150<br>(47%)            | 347<br>(49%)            | 282<br>(63%)            | 152<br>(76%)            | 0 (0%)                 | 0 (0%)                  | 0 (0%)                  | 0 (0%)                 | 0 (0%)                  | 0 (0%)                  | 0 (0%)                | 0 (0%)               | 71 (23%)                | 143<br>(20%)           | 77<br>(17%)           | 26<br>(13%)           |
| <b>Subtotal</b>              | <b>19049</b>   | <b>29495</b>   | <b>19559</b>   | <b>16314</b>  | <b>63<br/>(14)</b> | <b>62<br/>(13)</b> | <b>59<br/>(12)</b> | <b>53<br/>(12)</b> | <b>9553<br/>(50%)</b>   | <b>12021<br/>(41%)</b>  | <b>9076<br/>(46%)</b>   | <b>9436<br/>(58%)</b>   | <b>21<br/>(0%)</b>     | <b>41<br/>(0%)</b>      | <b>25<br/>(0%)</b>      | <b>20<br/>(0%)</b>     | <b>2708<br/>(14%)</b>   | <b>2524<br/>(9%)</b>    | <b>576<br/>(3%)</b>   | <b>136<br/>(1%)</b>  | <b>2529<br/>(13%)</b>   | <b>3508<br/>(12%)</b>  | <b>2083<br/>(11%)</b> | <b>1714<br/>(11%)</b> |
| <b>CKD Cohorts</b>           |                |                |                |               |                    |                    |                    |                    |                         |                         |                         |                         |                        |                         |                         |                        |                         |                         |                       |                      |                         |                        |                       |                       |
| AASK                         | 215            | 362            | 265            | 245           | 56<br>(11)         | 55<br>(11)         | 55<br>(10)         | 52<br>(11)         | 87<br>(40%)             | 117<br>(32%)            | 95<br>(36%)             | 123<br>(50%)            | 215<br>(100%)          | 362<br>(100%)           | 265<br>(100%)           | 245<br>(100%)          | 0 (0%)                  | 0 (0%)                  | 0 (0%)                | 0 (0%)               | 100 (47%)               | 99<br>(27%)            | 73<br>(28%)           | 46<br>(19%)           |

|               |      |       |      |      |         |         |         |         |            |            |            |            |           |            |            |            |             |            |            |           |           |           |           |           |
|---------------|------|-------|------|------|---------|---------|---------|---------|------------|------------|------------|------------|-----------|------------|------------|------------|-------------|------------|------------|-----------|-----------|-----------|-----------|-----------|
| BC CKD        | 2182 | 2796  | 1605 | 1063 | 68 (16) | 69 (13) | 68 (12) | 65 (11) | 1020 (47%) | 1115 (40%) | 686 (43%)  | 588 (55%)  | 12 (1%)   | 15 (1%)    | 13 (1%)    | 5 (0%)     | 709 (32%)   | 634 (23%)  | 252 (16%)  | 81 (8%)   | 117 (12%) | 157 (12%) | 94 (12%)  | 52 (10%)  |
| CanPREDDICT   | 344  | 569   | 390  | 340  | 67 (15) | 71 (12) | 69 (12) | 66 (11) | 147 (43%)  | 156 (27%)  | 137 (35%)  | 157 (46%)  | 3 (1%)    | 12 (2%)    | 11 (3%)    | 1 (0%)     | 17 (5%)     | 10 (2%)    | 5 (1%)     | 2 (1%)    |           |           |           |           |
| CARE FOR HOME | 68   | 164   | 161  | 69   | 63 (15) | 66 (12) | 67 (12) | 62 (11) | 32 (47%)   | 59 (36%)   | 65 (40%)   | 32 (46%)   | 1 (1%)    | 0 (0%)     | 1 (1%)     | 0 (0%)     | 0 (0%)      | 0 (0%)     | 0 (0%)     | 0 (0%)    | 6 (9%)    | 19 (12%)  | 14 (9%)   | 8 (12%)   |
| CCF           | 8858 | 13366 | 7971 | 5823 | 75 (13) | 73 (11) | 71 (11) | 67 (11) | 5221 (59%) | 6284 (47%) | 4109 (52%) | 3822 (66%) | 879 (10%) | 1388 (10%) | 1021 (13%) | 1003 (17%) | 74 (1%)     | 54 (0%)    | 14 (0%)    | 8 (0%)    | 799 (9%)  | 954 (7%)  | 569 (7%)  | 401 (7%)  |
| CKD-JAC       | 1643 | 685   | 131  | 19   | 61 (11) | 61 (11) | 56 (13) | 53 (12) | 600 (37%)  | 211 (31%)  | 45 (34%)   | 9 (47%)    | 0 (0%)    | 0 (0%)     | 0 (0%)     | 0 (0%)     | 1643 (100%) | 685 (100%) | 131 (100%) | 19 (100%) | 224 (16%) | 104 (18%) | 25 (22%)  | 4 (27%)   |
| CRIB          | 134  | 159   | 54   | 22   | 61 (16) | 63 (13) | 61 (12) | 56 (11) | 57 (43%)   | 46 (29%)   | 14 (26%)   | 11 (50%)   | 6 (4%)    | 8 (5%)     | 4 (7%)     | 4 (18%)    | 6 (4%)      | 13 (8%)    | 3 (6%)     | 2 (9%)    | 24 (18%)  | 17 (11%)  | 5 (9%)    | 0 (0%)    |
| GCKD          | 1015 | 1876  | 1252 | 907  | 55 (14) | 62 (11) | 62 (11) | 62 (10) | 518 (51%)  | 607 (32%)  | 460 (37%)  | 418 (46%)  | 0 (0%)    | 0 (0%)     | 0 (0%)     | 0 (0%)     | 0 (0%)      | 0 (0%)     | 0 (0%)     | 0 (0%)    | 241 (24%) | 266 (14%) | 184 (15%) | 112 (12%) |
| Gonryo        | 2236 | 931   | 153  | 32   | 62 (15) | 63 (13) | 57 (15) | 50 (16) | 1055 (47%) | 412 (44%)  | 82 (54%)   | 25 (78%)   | 0 (0%)    | 0 (0%)     | 0 (0%)     | 0 (0%)     | 2236 (100%) | 931 (100%) | 153 (100%) | 32 (100%) |           |           |           |           |
| MASTERPLAN    | 203  | 314   | 112  | 42   | 57 (14) | 62 (11) | 63 (11) | 59 (11) | 75 (37%)   | 71 (23%)   | 33 (29%)   | 25 (60%)   | 0 (0%)    | 0 (0%)     | 0 (0%)     | 0 (0%)     | 0 (0%)      | 0 (0%)     | 0 (0%)     | 0 (0%)    | 65 (33%)  | 50 (16%)  | 18 (16%)  | 6 (15%)   |
| MDRD          | 614  | 711   | 329  | 117  | 47 (14) | 53 (12) | 53 (12) | 50 (12) | 301 (49%)  | 223 (31%)  | 108 (33%)  | 61 (52%)   | 54 (9%)   | 84 (12%)   | 52 (16%)   | 34 (29%)   | 0 (0%)      | 0 (0%)     | 0 (0%)     | 0 (0%)    | 85 (14%)  | 82 (12%)  | 28 (9%)   | 15 (13%)  |
| MMKD          | 107  | 72    | 14   | 5    | 44 (13) | 51 (10) | 54 (11) | 52 (6)  | 50 (47%)   | 11 (15%)   | 4 (29%)    | 2 (40%)    | 0 (0%)    | 0 (0%)     | 0 (0%)     | 0 (0%)     | 0 (0%)      | 0 (0%)     | 0 (0%)     | 0 (0%)    | 29 (27%)  | 11 (15%)  | 1 (7%)    | 1 (20%)   |
| Nefrona       | 358  | 726   | 465  | 202  | 53 (14) | 61 (11) | 62 (10) | 62 (10) | 162 (45%)  | 214 (29%)  | 164 (35%)  | 115 (57%)  | 1 (0%)    | 0 (0%)     | 2 (0%)     | 1 (0%)     | 3 (1%)      | 0 (0%)     | 0 (0%)     | 0 (0%)    | 98 (27%)  | 136 (19%) | 75 (16%)  | 35 (17%)  |
| NephroTest    | 751  | 722   | 302  | 116  | 55 (16) | 61 (14) | 62 (13) | 60 (12) | 293 (39%)  | 174 (24%)  | 97 (32%)   | 46 (40%)   | 94 (13%)  | 105 (15%)  | 32 (11%)   | 13 (11%)   | 0 (0%)      | 0 (0%)     | 0 (0%)     | 0 (0%)    | 126 (17%) | 84 (12%)  | 40 (13%)  | 12 (10%)  |
| PSP-CKD       | 5731 | 7636  | 4492 | 2570 | 78 (11) | 75 (10) | 72 (10) | 69 (10) | 3655 (64%) | 4153 (54%) | 2600 (58%) | 1809 (70%) | 43 (1%)   | 80 (1%)    | 56 (1%)    | 28 (1%)    | 62 (1%)     | 105 (1%)   | 45 (1%)    | 16 (1%)   | 711 (19%) | 690 (14%) | 360 (13%) | 208 (12%) |
| RENAAL        | 333  | 530   | 329  | 276  | 60 (8)  | 61 (7)  | 61 (7)  | 57 (8)  | 103 (31%)  | 158 (30%)  | 125 (38%)  | 155 (56%)  | 27 (8%)   | 71 (13%)   | 60 (18%)   | 66 (24%)   | 127 (38%)   | 88 (17%)   | 16 (5%)    | 6 (2%)    | 96 (29%)  | 79 (15%)  | 51 (16%)  | 37 (13%)  |
| SRR-CKD       | 802  | 965   | 464  | 232  | 67 (17) | 69 (14) | 68 (14) | 65 (12) | 304 (38%)  | 251 (26%)  | 141 (30%)  | 104 (45%)  | 0 (0%)    | 0 (0%)     | 0 (0%)     | 0 (0%)     | 0 (0%)      | 0 (0%)     | 0 (0%)     | 0 (0%)    |           |           |           |           |

|                 |                |                |                |               |                    |                    |                    |                    |                         |                         |                         |                         |                        |                         |                         |                        |                         |                         |                       |                      |                         |                        |                       |                       |            |
|-----------------|----------------|----------------|----------------|---------------|--------------------|--------------------|--------------------|--------------------|-------------------------|-------------------------|-------------------------|-------------------------|------------------------|-------------------------|-------------------------|------------------------|-------------------------|-------------------------|-----------------------|----------------------|-------------------------|------------------------|-----------------------|-----------------------|------------|
| Sunnybrook      | 908            | 1070           | 572            | 310           | 63<br>(20)         | 65<br>(16)         | 64<br>(15)         | 59<br>(15)         | 451<br>(50%)            | 400<br>(37%)            | 218<br>(38%)            | 159<br>(51%)            | 0 (0%)                 | 0 (0%)                  | 0 (0%)                  | 0 (0%)                 | 0 (0%)                  | 0 (0%)                  | 0 (0%)                | 0 (0%)               | 0 (0%)                  | 90 (10%)               | 85<br>(8%)            | 51<br>(9%)            | 28<br>(9%) |
| <b>Subtotal</b> | <b>26502</b>   | <b>33654</b>   | <b>19061</b>   | <b>12390</b>  | <b>69<br/>(13)</b> | <b>70<br/>(11)</b> | <b>69<br/>(11)</b> | <b>66<br/>(11)</b> | <b>14131<br/>(53%)</b>  | <b>14662<br/>(44%)</b>  | <b>9183<br/>(48%)</b>   | <b>7661<br/>(62%)</b>   | <b>1335<br/>(5%)</b>   | <b>2125<br/>(6%)</b>    | <b>1517<br/>(8%)</b>    | <b>1400<br/>(11%)</b>  | <b>4877<br/>(18%)</b>   | <b>2520<br/>(7%)</b>    | <b>619<br/>(3%)</b>   | <b>166<br/>(1%)</b>  | <b>2811<br/>(11%)</b>   | <b>2833<br/>(8%)</b>   | <b>1588<br/>(8%)</b>  | <b>965<br/>(8%)</b>   |            |
| <b>Total</b>    | <b>1883346</b> | <b>2021250</b> | <b>1093881</b> | <b>636561</b> | <b>51<br/>(15)</b> | <b>57<br/>(14)</b> | <b>57<br/>(13)</b> | <b>55<br/>(13)</b> | <b>729626<br/>(39%)</b> | <b>442017<br/>(22%)</b> | <b>217670<br/>(20%)</b> | <b>167265<br/>(26%)</b> | <b>138394<br/>(7%)</b> | <b>203878<br/>(10%)</b> | <b>142771<br/>(13%)</b> | <b>89289<br/>(14%)</b> | <b>765052<br/>(41%)</b> | <b>319610<br/>(16%)</b> | <b>37637<br/>(3%)</b> | <b>4632<br/>(1%)</b> | <b>205581<br/>(11%)</b> | <b>123271<br/>(6%)</b> | <b>39065<br/>(4%)</b> | <b>25169<br/>(4%)</b> |            |

**eTable 4. Baseline Characteristics by BMI Category – Cardiovascular Disease and Chronic Kidney Disease Risk Factors**

|                           | SBP      |          |          |          | Diabetes   |             |             |             | History of CVD |             |             |            |
|---------------------------|----------|----------|----------|----------|------------|-------------|-------------|-------------|----------------|-------------|-------------|------------|
|                           | 18.5-<25 | 25-<30   | 30-<35   | ≥35      | 18.5-<25   | 25-<30      | 30-<35      | ≥35         | 18.5-<25       | 25-<30      | 30-<35      | ≥35        |
| <b>General Population</b> |          |          |          |          |            |             |             |             |                |             |             |            |
| Aichi                     | 125 (15) | 132 (15) | 139 (15) | 136 (18) | 295 (8%)   | 121 (12%)   | 10 (18%)    | 3 (50%)     | 34 (1%)        | 9 (1%)      | 1 (2%)      | 0 (0%)     |
| ARIC                      | 116 (19) | 121 (18) | 125 (18) | 130 (19) | 246 (5%)   | 640 (10%)   | 545 (19%)   | 400 (28%)   | 457 (9%)       | 756 (12%)   | 429 (15%)   | 273 (19%)  |
| AusDiab                   | 124 (18) | 132 (18) | 135 (18) | 136 (18) | 175 (4%)   | 333 (8%)    | 249 (14%)   | 161 (22%)   | 251 (6%)       | 423 (10%)   | 182 (11%)   | 64 (9%)    |
| Beaver Dam CKD            | 128 (21) | 132 (20) | 136 (20) | 139 (19) | 57 (4%)    | 139 (7%)    | 108 (11%)   | 89 (19%)    | 130 (10%)      | 214 (11%)   | 104 (10%)   | 42 (9%)    |
| Beijing                   | 123 (18) | 127 (18) | 131 (19) | 144 (24) | 179 (26%)  | 200 (32%)   | 36 (29%)    | 3 (38%)     | 113 (16%)      | 131 (20%)   | 31 (24%)    | 3 (38%)    |
| ChinaNS                   | 123 (19) | 134 (20) | 142 (21) | 140 (22) | 1644 (6%)  | 1487 (11%)  | 318 (14%)   | 49 (17%)    | 589 (2%)       | 458 (4%)    | 107 (5%)    | 12 (5%)    |
| CHS                       | 135 (22) | 136 (21) | 138 (20) | 142 (22) | 162 (10%)  | 290 (15%)   | 181 (26%)   | 91 (34%)    | 447 (27%)      | 500 (26%)   | 193 (27%)   | 79 (29%)   |
| CIRCS                     | 130 (18) | 136 (18) | 140 (18) | 139 (18) | 202 (2%)   | 114 (4%)    | 15 (5%)     | 2 (9%)      | 97 (1%)        | 42 (1%)     | 9 (3%)      | 1 (5%)     |
| COBRA                     | 154 (24) | 153 (24) | 148 (24) | 140 (22) | 79 (18%)   | 93 (22%)    | 35 (18%)    | 22 (21%)    | 75 (17%)       | 76 (18%)    | 34 (18%)    | 17 (17%)   |
| ESTHER                    | 134 (19) | 140 (19) | 145 (19) | 148 (21) | 278 (11%)  | 843 (18%)   | 539 (28%)   | 216 (37%)   | 357 (14%)      | 800 (17%)   | 439 (23%)   | 137 (24%)  |
| Framingham                | 124 (19) | 129 (19) | 132 (17) | 132 (18) | 27 (3%)    | 78 (6%)     | 73 (13%)    | 55 (22%)    | 69 (8%)        | 138 (11%)   | 75 (13%)    | 32 (13%)   |
| Geisinger                 | 119 (18) | 126 (18) | 129 (18) | 131 (18) | 3988 (4%)  | 9635 (8%)   | 11225 (12%) | 16884 (19%) | 5221 (6%)      | 8166 (7%)   | 6128 (7%)   | 5639 (6%)  |
| Gubbio                    | 125 (18) | 130 (18) | 134 (18) | 138 (17) | 8 (2%)     | 35 (4%)     | 36 (9%)     | 11 (11%)    | 14 (3%)        | 43 (5%)     | 27 (7%)     | 14 (15%)   |
| HUNT                      | 131 (20) | 140 (21) | 146 (22) | 147 (23) | 436 (2%)   | 876 (3%)    | 546 (6%)    | 239 (11%)   | 1395 (5%)      | 2442 (9%)   | 938 (11%)   | 209 (10%)  |
| IPHS                      | 132 (18) | 138 (17) | 142 (17) | 144 (18) | 1661 (3%)  | 890 (3%)    | 110 (4%)    | 13 (7%)     | 2686 (4%)      | 1457 (6%)   | 187 (7%)    | 9 (5%)     |
| JHS                       | 124 (18) | 125 (17) | 126 (16) | 127 (16) | 29 (6%)    | 131 (12%)   | 185 (20%)   | 269 (28%)   | 33 (7%)        | 84 (8%)     | 83 (9%)     | 82 (8%)    |
| JMS                       | 125 (19) | 133 (18) | 137 (20) | 139 (15) | 2073 (55%) | 595 (56%)   | 58 (58%)    | 1 (25%)     | 32 (1%)        | 13 (1%)     | 5 (5%)      | 0 (0%)     |
| KHS                       | 119 (17) | 127 (18) | 133 (19) | 139 (20) | 12778 (5%) | 9228 (9%)   | 1017 (13%)  | 99 (19%)    | 3525 (2%)      | 2003 (2%)   | 181 (2%)    | 17 (3%)    |
| Maccabi                   | 117 (16) | 126 (17) | 131 (18) | 134 (19) | 11178 (5%) | 29439 (12%) | 23811 (19%) | 15485 (26%) | 18305 (8%)     | 31782 (13%) | 17986 (15%) | 8242 (14%) |
| MESA                      | 122 (22) | 127 (21) | 129 (21) | 132 (21) | 131 (7%)   | 301 (11%)   | 246 (17%)   | 173 (23%)   | 0 (0%)         | 0 (0%)      | 0 (0%)      | 0 (0%)     |
| MRC                       | 148 (23) | 149 (22) | 151 (22) | 153 (22) | 295 (6%)   | 406 (8%)    | 186 (11%)   | 60 (15%)    | 842 (17%)      | 868 (17%)   | 267 (17%)   | 76 (19%)   |
| Mt Sinai BioMe            | 120 (19) | 127 (19) | 130 (19) | 132 (20) | 826 (12%)  | 1302 (17%)  | 1083 (24%)  | 1154 (29%)  | 556 (8%)       | 771 (10%)   | 584 (13%)   | 533 (13%)  |
| NHANES                    | 119 (19) | 125 (19) | 126 (18) | 127 (18) | 1070 (5%)  | 2300 (12%)  | 1901 (17%)  | 1880 (25%)  | 1287 (7%)      | 1871 (10%)  | 1137 (11%)  | 831 (12%)  |
| NIPPON DATA80             | 135 (21) | 142 (21) | 147 (23) | 143 (21) | 182 (3%)   | 77 (4%)     | 12 (7%)     | 0 (0%)      | 188 (3%)       | 43 (2%)     | 5 (3%)      | 0 (0%)     |

|                              |                 |                 |                 |                 |                    |                     |                     |                     |                    |                     |                     |                     |
|------------------------------|-----------------|-----------------|-----------------|-----------------|--------------------|---------------------|---------------------|---------------------|--------------------|---------------------|---------------------|---------------------|
| NIPPON DATA90                | 134 (21)        | 141 (19)        | 148 (22)        | 157 (22)        | 263 (5%)           | 96 (6%)             | 11 (7%)             | 0 (0%)              | 226 (4%)           | 84 (5%)             | 8 (5%)              | 1 (5%)              |
| Ohasama                      | 129 (18)        | 133 (16)        | 129 (14)        | 143 (22)        | 134 (12%)          | 60 (13%)            | 2 (5%)              | 3 (38%)             | 61 (6%)            | 32 (7%)             | 1 (3%)              | 1 (13%)             |
| Okinawa 83                   | 129 (20)        | 137 (20)        | 145 (21)        | 151 (21)        | 69 (3%)            | 47 (5%)             | 16 (13%)            | 1 (9%)              |                    |                     |                     |                     |
| Okinawa 93                   | 125 (17)        | 131 (17)        | 135 (17)        | 138 (17)        | 1326 (3%)          | 1216 (6%)           | 281 (10%)           | 49 (17%)            |                    |                     |                     |                     |
| PREVEND                      | 121 (17)        | 133 (20)        | 139 (20)        | 139 (20)        | 171 (5%)           | 251 (8%)            | 107 (11%)           | 30 (11%)            | 102 (3%)           | 233 (7%)            | 61 (6%)             | 21 (8%)             |
| Rancho Bernardo              | 136 (24)        | 136 (21)        | 136 (18)        | 140 (20)        | 94 (11%)           | 101 (15%)           | 30 (20%)            | 19 (40%)            | 131 (15%)          | 98 (15%)            | 16 (11%)            | 6 (13%)             |
| RCAV                         | 130 (19)        | 133 (17)        | 135 (17)        | 137 (17)        | 88755 (13%)        | 245887 (21%)        | 232922 (31%)        | 189250 (44%)        | 120182 (18%)       | 215009 (18%)        | 143343 (19%)        | 89158 (21%)         |
| REGARDS                      | 124 (17)        | 127 (16)        | 129 (16)        | 132 (16)        | 636 (9%)           | 1833 (17%)          | 1743 (27%)          | 1809 (39%)          | 1499 (22%)         | 2528 (24%)          | 1511 (24%)          | 1094 (24%)          |
| RSIII                        | 127 (19)        | 134 (18)        | 137 (19)        | 139 (18)        | 52 (5%)            | 177 (11%)           | 130 (21%)           | 96 (40%)            | 53 (5%)            | 113 (7%)            | 79 (13%)            | 25 (10%)            |
| SEED                         | 136 (21)        | 139 (20)        | 142 (21)        | 141 (19)        | 730 (22%)          | 752 (33%)           | 266 (42%)           | 91 (49%)            | 304 (9%)           | 258 (11%)           | 69 (11%)            | 24 (13%)            |
| Taiwan MJ                    | 118 (18)        | 129 (20)        | 134 (21)        | 137 (20)        | 11352 (3%)         | 9713 (8%)           | 2181 (13%)          | 383 (15%)           | 8638 (3%)          | 5543 (5%)           | 1077 (6%)           | 158 (6%)            |
| Takahata                     | 133 (16)        | 138 (15)        | 141 (13)        | 161 (21)        | 147 (10%)          | 99 (15%)            | 10 (12%)            | 0 (0%)              | 66 (4%)            | 27 (4%)             | 2 (2%)              | 0 (0%)              |
| TLGS                         | 113 (16)        | 121 (19)        | 125 (20)        | 131 (19)        | 172 (5%)           | 366 (9%)            | 216 (12%)           | 78 (16%)            | 113 (3%)           | 222 (5%)            | 91 (5%)             | 35 (7%)             |
| Tromso                       | 138 (21)        | 146 (22)        | 152 (23)        | 160 (22)        | 69 (2%)            | 131 (4%)            | 77 (8%)             | 41 (21%)            | 152 (5%)           | 264 (8%)            | 83 (9%)             | 14 (7%)             |
| ULSAM                        | 129 (16)        | 134 (17)        | 141 (17)        | 144 (27)        | 15 (2%)            | 13 (3%)             | 1 (2%)              | 1 (14%)             | 0 (0%)             | 5 (1%)              | 0 (0%)              | 0 (0%)              |
| <b>Subtotal</b>              | <b>124 (18)</b> | <b>131 (18)</b> | <b>134 (17)</b> | <b>136 (17)</b> | <b>142016 (8%)</b> | <b>320314 (16%)</b> | <b>280521 (27%)</b> | <b>229211 (38%)</b> | <b>168230 (9%)</b> | <b>277506 (14%)</b> | <b>175473 (17%)</b> | <b>106849 (18%)</b> |
| <b>High CVD Risk Cohorts</b> |                 |                 |                 |                 |                    |                     |                     |                     |                    |                     |                     |                     |
| ADVANCE                      | 141 (22)        | 145 (21)        | 148 (21)        | 147 (21)        | 2987 (100%)        | 4538 (100%)         | 2404 (100%)         | 1109 (100%)         | 667 (22%)          | 1213 (27%)          | 636 (26%)           | 286 (26%)           |
| KP Hawaii                    | 132 (21)        | 133 (20)        | 134 (19)        | 136 (20)        | 2778 (40%)         | 4685 (50%)          | 3855 (58%)          | 4279 (65%)          | 1384 (20%)         | 1754 (19%)          | 1192 (18%)          | 1110 (17%)          |
| NZDCS                        | 135 (20)        | 138 (19)        | 139 (19)        | 140 (19)        | 4600 (100%)        | 9139 (100%)         | 7437 (100%)         | 6549 (100%)         | 880 (19%)          | 2004 (22%)          | 1529 (21%)          | 1053 (16%)          |
| Pima                         | 116 (18)        | 120 (19)        | 120 (18)        | 119 (16)        | 127 (23%)          | 325 (32%)           | 301 (28%)           | 373 (27%)           |                    |                     |                     |                     |
| SMART                        | 139 (22)        | 142 (21)        | 144 (21)        | 144 (21)        | 489 (13%)          | 850 (18%)           | 475 (31%)           | 220 (42%)           | 1892 (52%)         | 2953 (62%)          | 937 (60%)           | 231 (44%)           |
| ZODIAC                       | 148 (25)        | 152 (25)        | 152 (23)        | 154 (24)        | 316 (100%)         | 711 (100%)          | 447 (100%)          | 200 (100%)          | 136 (43%)          | 223 (31%)           | 161 (36%)           | 67 (34%)            |
| <b>Subtotal</b>              | <b>135 (21)</b> | <b>138 (20)</b> | <b>138 (20)</b> | <b>137 (20)</b> | <b>11297 (59%)</b> | <b>20248 (69%)</b>  | <b>14919 (76%)</b>  | <b>12730 (78%)</b>  | <b>4959 (26%)</b>  | <b>8147 (28%)</b>   | <b>4455 (23%)</b>   | <b>2747 (17%)</b>   |
| <b>CKD Cohorts</b>           |                 |                 |                 |                 |                    |                     |                     |                     |                    |                     |                     |                     |
| AASK                         | 150 (24)        | 150 (23)        | 149 (24)        | 153 (24)        | 0 (0%)             | 0 (0%)              | 0 (0%)              | 0 (0%)              | 126 (59%)          | 185 (51%)           | 141 (53%)           | 93 (38%)            |
| BC CKD                       | 136 (23)        | 137 (23)        | 138 (23)        | 136 (24)        | 831 (38%)          | 1329 (48%)          | 932 (58%)           | 730 (69%)           | 520 (24%)          | 779 (28%)           | 488 (30%)           | 342 (32%)           |



|                 |                 |                 |                 |                 |                    |                     |                     |                     |                     |                     |                     |                     |
|-----------------|-----------------|-----------------|-----------------|-----------------|--------------------|---------------------|---------------------|---------------------|---------------------|---------------------|---------------------|---------------------|
| CanPREDDICT     | 132 (20)        | 132 (19)        | 134 (19)        | 136 (21)        | 106 (31%)          | 261 (46%)           | 225 (58%)           | 246 (72%)           | 111 (32%)           | 240 (42%)           | 143 (37%)           | 137 (40%)           |
| CARE FOR HOME   | 145 (25)        | 152 (24)        | 151 (22)        | 158 (25)        | 11 (16%)           | 47 (29%)            | 72 (45%)            | 41 (59%)            | 18 (26%)            | 51 (31%)            | 48 (30%)            | 24 (35%)            |
| CCF             | 129 (21)        | 130 (19)        | 132 (19)        | 133 (20)        | 1227 (14%)         | 2751 (21%)          | 2311 (29%)          | 2462 (42%)          | 2259 (26%)          | 3778 (28%)          | 2220 (28%)          | 1486 (26%)          |
| CKD-JAC         | 131 (18)        | 136 (19)        | 134 (19)        | 144 (18)        | 455 (28%)          | 292 (43%)           | 56 (43%)            | 12 (63%)            | 158 (10%)           | 94 (14%)            | 13 (10%)            | 1 (5%)              |
| CRIB            | 150 (22)        | 154 (21)        | 150 (25)        | 147 (22)        | 16 (12%)           | 20 (13%)            | 22 (41%)            | 6 (27%)             | 53 (40%)            | 82 (52%)            | 23 (43%)            | 10 (45%)            |
| GCKD            | 136 (20)        | 141 (20)        | 141 (21)        | 139 (20)        | 163 (16%)          | 528 (28%)           | 554 (44%)           | 560 (62%)           | 225 (22%)           | 578 (31%)           | 495 (40%)           | 404 (45%)           |
| Gonryo          | 131 (16)        | 134 (15)        | 134 (15)        | 136 (17)        | 681 (30%)          | 311 (33%)           | 59 (39%)            | 14 (44%)            | 394 (18%)           | 154 (17%)           | 21 (14%)            | 4 (13%)             |
| MASTERPLAN      | 135 (20)        | 141 (20)        | 141 (24)        | 144 (24)        | 30 (15%)           | 75 (24%)            | 41 (37%)            | 17 (40%)            | 45 (22%)            | 105 (34%)           | 43 (39%)            | 12 (29%)            |
| MDRD            | 130 (19)        | 133 (18)        | 136 (18)        | 134 (18)        | 21 (3%)            | 40 (6%)             | 25 (8%)             | 16 (14%)            | 40 (7%)             | 95 (13%)            | 40 (12%)            | 15 (13%)            |
| MMKD            | 139 (23)        | 137 (18)        | 133 (21)        | 151 (26)        | 0 (0%)             | 0 (0%)              | 0 (0%)              | 0 (0%)              | 8 (7%)              | 13 (18%)            | 1 (7%)              | 0 (0%)              |
| Nefrona         | 140 (22)        | 145 (21)        | 146 (20)        | 149 (23)        | 73 (45%)           | 206 (51%)           | 175 (61%)           | 89 (72%)            |                     |                     |                     |                     |
| NephroTest      | 133 (21)        | 138 (20)        | 140 (19)        | 139 (21)        | 117 (16%)          | 240 (33%)           | 148 (49%)           | 73 (63%)            | 99 (13%)            | 161 (22%)           | 82 (27%)            | 37 (32%)            |
| PSP-CKD         | 132 (16)        | 133 (15)        | 134 (15)        | 135 (15)        | 1010 (18%)         | 1837 (24%)          | 1493 (33%)          | 1113 (43%)          | 1765 (31%)          | 2279 (30%)          | 1313 (29%)          | 699 (27%)           |
| RENAAL          | 151 (21)        | 153 (20)        | 154 (18)        | 153 (18)        | 333 (100%)         | 530 (100%)          | 329 (100%)          | 276 (100%)          |                     |                     |                     |                     |
| SRR-CKD         | 139 (23)        | 141 (23)        | 142 (23)        | 143 (21)        | 197 (25%)          | 336 (35%)           | 245 (53%)           | 144 (62%)           | 234 (29%)           | 314 (33%)           | 151 (33%)           | 75 (32%)            |
| Sunnybrook      | 131 (22)        | 136 (21)        | 136 (20)        | 136 (21)        | 333 (37%)          | 513 (48%)           | 321 (56%)           | 191 (62%)           | 105 (12%)           | 133 (12%)           | 63 (11%)            | 29 (9%)             |
| <b>Subtotal</b> | <b>132 (20)</b> | <b>134 (19)</b> | <b>135 (19)</b> | <b>136 (19)</b> | <b>5604 (21%)</b>  | <b>9316 (28%)</b>   | <b>7008 (37%)</b>   | <b>5990 (48%)</b>   | <b>6160 (23%)</b>   | <b>9041 (27%)</b>   | <b>5285 (28%)</b>   | <b>3368 (27%)</b>   |
| <b>Total</b>    | <b>124 (18)</b> | <b>131 (18)</b> | <b>134 (17)</b> | <b>136 (18)</b> | <b>158917 (8%)</b> | <b>349878 (17%)</b> | <b>302448 (28%)</b> | <b>247931 (39%)</b> | <b>179349 (10%)</b> | <b>294694 (15%)</b> | <b>185213 (17%)</b> | <b>112964 (18%)</b> |

**eTable 5. Baseline Characteristics by BMI Category - Kidney Measures**

|                           | mean (SD) eGFR ml/min/1.73m <sup>2</sup> |          |          |          | N (%) ACR >30mg/g |            |            |            | N (%) missing ACR |              |              |             |
|---------------------------|------------------------------------------|----------|----------|----------|-------------------|------------|------------|------------|-------------------|--------------|--------------|-------------|
|                           | 18.5-<25                                 | 25-<30   | 30-<35   | ≥35      | 18.5-<25          | 25-<30     | 30-<35     | ≥35        | 18.5-<25          | 25-<30       | 30-<35       | ≥35         |
| <b>General Population</b> |                                          |          |          |          |                   |            |            |            |                   |              |              |             |
| Aichi                     | 100 (13)                                 | 98 (13)  | 99 (13)  | 97 (15)  | 62 (2%)           | 32 (3%)    | 7 (14%)    | 1 (17%)    | 198 (5%)          | 49 (5%)      | 5 (9%)       | 0 (0%)      |
| ARIC                      | 103 (14)                                 | 101 (16) | 102 (17) | 106 (18) |                   |            |            |            | 5042 (100%)       | 6163 (100%)  | 2875 (100%)  | 1408 (100%) |
| AusDiab                   | 88 (16)                                  | 84 (16)  | 84 (16)  | 87 (17)  | 217 (5%)          | 261 (6%)   | 159 (9%)   | 79 (11%)   | 7 (0%)            | 11 (0%)      | 11 (1%)      | 4 (1%)      |
| Beaver Dam CKD            | 81 (19)                                  | 79 (17)  | 78 (18)  | 79 (19)  | 45 (3%)           | 72 (4%)    | 48 (5%)    | 31 (7%)    | 9 (1%)            | 6 (0%)       | 2 (0%)       | 2 (0%)      |
| Beijing                   | 84 (14)                                  | 82 (15)  | 79 (14)  | 84 (14)  | 39 (5%)           | 43 (7%)    | 5 (4%)     | 1 (13%)    | 0 (0%)            | 0 (0%)       | 0 (0%)       | 0 (0%)      |
| ChinaNS                   | 102 (18)                                 | 98 (17)  | 97 (17)  | 100 (19) | 3015 (11%)        | 1724 (12%) | 410 (18%)  | 57 (20%)   | 0 (0%)            | 0 (0%)       | 0 (0%)       | 0 (0%)      |
| CHS                       | 70 (17)                                  | 71 (16)  | 71 (17)  | 71 (19)  |                   |            |            |            | 1659 (100%)       | 1939 (100%)  | 707 (100%)   | 269 (100%)  |
| CIRCS                     | 89 (15)                                  | 87 (15)  | 87 (16)  | 84 (22)  | 198 (2%)          | 126 (4%)   | 17 (5%)    | 4 (18%)    | 27 (0%)           | 10 (0%)      | 0 (0%)       | 0 (0%)      |
| COBRA                     | 93 (22)                                  | 97 (19)  | 101 (19) | 106 (17) | 78 (18%)          | 64 (15%)   | 26 (14%)   | 12 (12%)   | 2 (0%)            | 0 (0%)       | 0 (0%)       | 1 (1%)      |
| ESTHER                    | 87 (20)                                  | 87 (20)  | 87 (20)  | 87 (22)  | 246 (9%)          | 502 (11%)  | 279 (15%)  | 123 (21%)  | 10 (0%)           | 20 (0%)      | 8 (0%)       | 2 (0%)      |
| Framingham                | 89 (17)                                  | 88 (19)  | 88 (22)  | 90 (18)  | 112 (13%)         | 134 (11%)  | 73 (13%)   | 36 (15%)   | 0 (0%)            | 0 (0%)       | 0 (0%)       | 0 (0%)      |
| Geisinger                 | 99 (23)                                  | 92 (22)  | 91 (22)  | 94 (22)  | 977 (34%)         | 1760 (30%) | 2070 (31%) | 3326 (35%) | 89414 (97%)       | 113116 (95%) | 83244 (93%)  | 79797 (89%) |
| Gubbio                    | 84 (11)                                  | 85 (12)  | 85 (11)  | 83 (13)  | 13 (3%)           | 27 (3%)    | 17 (4%)    | 13 (14%)   | 0 (0%)            | 0 (0%)       | 0 (0%)       | 0 (0%)      |
| HUNT                      | 102 (18)                                 | 96 (19)  | 92 (20)  | 93 (20)  | 260 (11%)         | 502 (12%)  | 293 (14%)  | 122 (17%)  | 23250 (91%)       | 23253 (84%)  | 6385 (76%)   | 1447 (67%)  |
| IPHS                      | 87 (14)                                  | 84 (14)  | 84 (15)  | 87 (16)  | 1189 (2%)         | 849 (3%)   | 150 (6%)   | 15 (8%)    | 734 (1%)          | 302 (1%)     | 38 (1%)      | 5 (3%)      |
| JHS                       | 100 (22)                                 | 97 (20)  | 98 (21)  | 99 (22)  | 20 (6%)           | 60 (8%)    | 71 (11%)   | 107 (17%)  | 157 (32%)         | 330 (31%)    | 280 (30%)    | 339 (35%)   |
| JMS                       | 98 (15)                                  | 96 (15)  | 97 (14)  | 97 (19)  | 59 (2%)           | 44 (4%)    | 3 (3%)     |            | 27 (1%)           | 6 (1%)       | 2 (2%)       | 0 (0%)      |
| KHS                       | 87 (14)                                  | 84 (14)  | 85 (15)  | 86 (16)  | 18479 (12%)       | 7283 (11%) | 568 (11%)  | 60 (18%)   | 85775 (37%)       | 39193 (36%)  | 2744 (34%)   | 170 (33%)   |
| Maccabi                   | 97 (21)                                  | 89 (21)  | 88 (21)  | 90 (22)  | 2246 (15%)        | 5453 (17%) | 4881 (22%) | 3436 (27%) | 217225 (94%)      | 209388 (87%) | 101904 (82%) | 47512 (79%) |
| MESA                      | 83 (16)                                  | 83 (16)  | 83 (17)  | 86 (18)  | 140 (7%)          | 227 (9%)   | 164 (12%)  | 109 (14%)  | 6 (0%)            | 8 (0%)       | 10 (1%)      | 5 (1%)      |
| MRC                       | 58 (15)                                  | 57 (15)  | 56 (14)  | 53 (14)  | 346 (8%)          | 350 (7%)   | 120 (8%)   | 25 (7%)    | 282 (6%)          | 255 (5%)     | 81 (5%)      | 27 (7%)     |
| Mt Sinai BioMe            | 87 (26)                                  | 83 (25)  | 82 (25)  | 87 (27)  | 310 (50%)         | 420 (45%)  | 328 (44%)  | 346 (48%)  | 6354 (91%)        | 6598 (88%)   | 3845 (84%)   | 3297 (82%)  |
| NHANES                    | 102 (25)                                 | 95 (25)  | 95 (25)  | 98 (26)  | 1932 (10%)        | 2088 (11%) | 1404 (13%) | 1206 (16%) | 450 (2%)          | 411 (2%)     | 157 (1%)     | 142 (2%)    |
| NIPPON DATA80             | 84 (17)                                  | 82 (17)  | 79 (18)  | 90 (20)  |                   |            |            |            | 6841 (100%)       | 1810 (100%)  | 181 (100%)   | 15 (100%)   |

|                              |                |                |                |                |                   |                   |                    |                    |                      |                      |                     |                     |
|------------------------------|----------------|----------------|----------------|----------------|-------------------|-------------------|--------------------|--------------------|----------------------|----------------------|---------------------|---------------------|
| NIPPON DATA90                | 95 (17)        | 91 (16)        | 91 (17)        | 94 (15)        |                   |                   |                    |                    | 5379 (100%)          | 1653 (100%)          | 168 (100%)          | 19 (100%)           |
| Ohasama                      | 95 (12)        | 94 (13)        | 94 (16)        | 99 (10)        | 53 (5%)           | 34 (8%)           | 3 (8%)             |                    | 15 (1%)              | 7 (2%)               | 0 (0%)              | 0 (0%)              |
| Okinawa 83                   | 76 (17)        | 74 (15)        | 73 (15)        | 78 (19)        | 1073 (18%)        | 630 (24%)         | 145 (35%)          | 16 (43%)           | 0 (0%)               | 0 (0%)               | 0 (0%)              | 0 (0%)              |
| Okinawa 93                   | 78 (17)        | 75 (16)        | 77 (17)        | 80 (17)        | 1642 (3%)         | 1357 (5%)         | 336 (8%)           | 53 (14%)           | 0 (0%)               | 0 (0%)               | 0 (0%)              | 0 (0%)              |
| PREVEND                      | 100 (15)       | 93 (16)        | 93 (16)        | 96 (17)        | 260 (8%)          | 397 (12%)         | 152 (16%)          | 59 (21%)           | 13 (0%)              | 10 (0%)              | 7 (1%)              | 0 (0%)              |
| Rancho Bernardo              | 65 (16)        | 65 (15)        | 66 (15)        | 69 (16)        | 134 (15%)         | 91 (14%)          | 15 (10%)           | 9 (19%)            | 10 (1%)              | 1 (0%)               | 0 (0%)              | 0 (0%)              |
| RCAV                         | 86 (17)        | 83 (15)        | 83 (15)        | 85 (16)        | 1543 (23%)        | 4036 (22%)        | 3981 (23%)         | 3306 (26%)         | 652497 (99%)         | 1155417 (98%)        | 739740 (98%)        | 415567 (97%)        |
| REGARDS                      | 84 (19)        | 84 (20)        | 85 (20)        | 88 (23)        | 845 (13%)         | 1337 (13%)        | 995 (16%)          | 915 (21%)          | 266 (4%)             | 392 (4%)             | 250 (4%)            | 201 (4%)            |
| RSIII                        | 87 (13)        | 86 (14)        | 86 (14)        | 86 (16)        | 42 (5%)           | 69 (5%)           | 45 (8%)            | 25 (11%)           | 60 (6%)              | 80 (5%)              | 31 (5%)             | 15 (6%)             |
| SEED                         | 87 (18)        | 84 (19)        | 84 (20)        | 87 (21)        |                   |                   |                    |                    | 3364 (100%)          | 2248 (100%)          | 628 (100%)          | 184 (100%)          |
| Taiwan MJ                    | 90 (18)        | 84 (17)        | 85 (18)        | 90 (20)        | 5214 (2%)         | 3759 (3%)         | 927 (5%)           | 227 (9%)           | 15940 (5%)           | 2656 (2%)            | 484 (3%)            | 105 (4%)            |
| Takahata                     | 98 (12)        | 96 (12)        | 96 (16)        | 96 (30)        | 191 (13%)         | 120 (18%)         | 28 (34%)           | 3 (75%)            | 5 (0%)               | 2 (0%)               | 0 (0%)              | 0 (0%)              |
| TLGS                         | 81 (15)        | 74 (14)        | 72 (14)        | 72 (14)        | 66 (2%)           | 71 (2%)           | 40 (3%)            | 14 (4%)            | 1019 (27%)           | 1032 (25%)           | 440 (24%)           | 116 (24%)           |
| Tromso                       | 95 (13)        | 92 (13)        | 91 (13)        | 90 (15)        | 142 (5%)          | 195 (7%)          | 64 (8%)            | 26 (16%)           | 561 (17%)            | 360 (11%)            | 112 (12%)           | 29 (15%)            |
| ULSAM                        | 99 (10)        | 97 (10)        | 96 (12)        | 104 (6)        |                   |                   |                    |                    | 659 (100%)           | 496 (100%)           | 48 (100%)           | 7 (100%)            |
| <b>Subtotal</b>              | <b>89 (18)</b> | <b>85 (17)</b> | <b>85 (17)</b> | <b>87 (18)</b> | <b>41588 (6%)</b> | <b>34388 (9%)</b> | <b>17873 (16%)</b> | <b>13772 (24%)</b> | <b>1113893 (61%)</b> | <b>1564974 (80%)</b> | <b>943759 (89%)</b> | <b>550501 (91%)</b> |
| <b>High CVD Risk Cohorts</b> |                |                |                |                |                   |                   |                    |                    |                      |                      |                     |                     |
| ADVANCE                      | 79 (18)        | 78 (17)        | 76 (17)        | 77 (17)        | 940 (33%)         | 1301 (30%)        | 663 (29%)          | 321 (31%)          | 107 (4%)             | 184 (4%)             | 139 (6%)            | 71 (6%)             |
| KP Hawaii                    | 73 (23)        | 75 (23)        | 79 (23)        | 83 (25)        | 1660 (33%)        | 2330 (34%)        | 1890 (38%)         | 2106 (44%)         | 1893 (27%)           | 2469 (26%)           | 1654 (25%)          | 1746 (27%)          |
| NZDCS                        | 75 (24)        | 74 (22)        | 76 (22)        | 81 (23)        | 242 (6%)          | 495 (6%)          | 586 (9%)           | 618 (11%)          | 655 (14%)            | 1189 (13%)           | 852 (11%)           | 673 (10%)           |
| Pima                         | 121 (21)       | 116 (22)       | 119 (19)       | 123 (15)       | 110 (20%)         | 271 (26%)         | 214 (20%)          | 245 (18%)          | 0 (0%)               | 0 (0%)               | 0 (0%)              | 0 (0%)              |
| SMART                        | 79 (19)        | 77 (18)        | 79 (19)        | 83 (20)        | 368 (31%)         | 527 (33%)         | 223 (36%)          | 95 (40%)           | 2482 (68%)           | 3128 (66%)           | 934 (60%)           | 285 (54%)           |
| ZODIAC                       | 66 (17)        | 69 (17)        | 67 (17)        | 70 (17)        | 27 (9%)           | 62 (9%)           | 27 (6%)            | 18 (9%)            | 11 (3%)              | 21 (3%)              | 12 (3%)             | 4 (2%)              |
| <b>Subtotal</b>              | <b>77 (22)</b> | <b>77 (21)</b> | <b>79 (22)</b> | <b>85 (23)</b> | <b>3347 (24%)</b> | <b>4986 (22%)</b> | <b>3603 (23%)</b>  | <b>3403 (25%)</b>  | <b>5148 (27%)</b>    | <b>6991 (24%)</b>    | <b>3591 (18%)</b>   | <b>2779 (17%)</b>   |
| <b>CKD Cohorts</b>           |                |                |                |                |                   |                   |                    |                    |                      |                      |                     |                     |
| AASK                         | 45 (15)        | 46 (14)        | 46 (14)        | 46 (15)        | 112 (52%)         | 184 (51%)         | 143 (54%)          | 153 (63%)          | 0 (0%)               | 4 (1%)               | 0 (0%)              | 1 (0%)              |
| BC CKD                       | 32 (16)        | 33 (15)        | 34 (16)        | 36 (17)        | 1173 (69%)        | 1383 (67%)        | 772 (65%)          | 511 (66%)          | 482 (22%)            | 719 (26%)            | 426 (27%)           | 286 (27%)           |
| CanPREDDICT                  | 25 (10)        | 26 (10)        | 26 (10)        | 26 (10)        | 124 (66%)         | 216 (72%)         | 146 (75%)          | 134 (73%)          | 157 (46%)            | 270 (47%)            | 195 (50%)           | 156 (46%)           |

|                 |                |                |                |                |                   |                    |                    |                    |                      |                      |                     |                     |
|-----------------|----------------|----------------|----------------|----------------|-------------------|--------------------|--------------------|--------------------|----------------------|----------------------|---------------------|---------------------|
| CARE FOR HOME   | 47 (20)        | 48 (18)        | 48 (19)        | 50 (16)        | 37 (54%)          | 75 (46%)           | 84 (52%)           | 39 (57%)           | 0 (0%)               | 0 (0%)               | 1 (1%)              | 0 (0%)              |
| CCF             | 47 (12)        | 48 (11)        | 48 (11)        | 47 (12)        | 2321 (74%)        | 3679 (75%)         | 2265 (72%)         | 1670 (67%)         | 5718 (65%)           | 8437 (63%)           | 4828 (61%)          | 3331 (57%)          |
| CKD-JAC         | 37 (17)        | 38 (18)        | 39 (17)        | 45 (15)        | 172 (11%)         | 59 (10%)           | 16 (14%)           |                    | 134 (8%)             | 72 (11%)             | 15 (11%)            | 2 (11%)             |
| CRIB            | 21 (11)        | 23 (11)        | 24 (11)        | 23 (11)        | 114 (87%)         | 129 (82%)          | 44 (83%)           | 17 (85%)           | 3 (2%)               | 1 (1%)               | 1 (2%)              | 2 (9%)              |
| GCKD            | 53 (21)        | 49 (17)        | 48 (17)        | 48 (17)        | 646 (64%)         | 1083 (59%)         | 648 (53%)          | 475 (53%)          | 11 (1%)              | 25 (1%)              | 20 (2%)             | 15 (2%)             |
| Gonryo          | 74 (33)        | 76 (30)        | 78 (34)        | 88 (36)        | 739 (83%)         | 271 (82%)          | 56 (84%)           | 11 (92%)           | 1346 (60%)           | 600 (64%)            | 86 (56%)            | 20 (63%)            |
| MASTERPLAN      | 38 (15)        | 37 (15)        | 34 (14)        | 31 (12)        | 141 (74%)         | 204 (69%)          | 81 (74%)           | 31 (76%)           | 13 (6%)              | 20 (6%)              | 3 (3%)              | 1 (2%)              |
| MDRD            | 39 (23)        | 41 (20)        | 42 (20)        | 43 (20)        |                   |                    |                    |                    | 614 (100%)           | 711 (100%)           | 329 (100%)          | 117 (100%)          |
| MMKD            | 49 (33)        | 45 (26)        | 47 (24)        | 31 (19)        | 99 (93%)          | 66 (92%)           | 12 (86%)           | 5 (100%)           | 0 (0%)               | 0 (0%)               | 0 (0%)              | 0 (0%)              |
| Nefrona         | 30 (15)        | 32 (14)        | 33 (14)        | 31 (13)        | 140 (68%)         | 261 (65%)          | 185 (65%)          | 92 (70%)           | 151 (42%)            | 326 (45%)            | 181 (39%)           | 70 (35%)            |
| NephroTest      | 48 (24)        | 43 (21)        | 40 (19)        | 43 (21)        | 485 (65%)         | 468 (66%)          | 222 (74%)          | 85 (73%)           | 7 (1%)               | 11 (2%)              | 3 (1%)              | 0 (0%)              |
| PSP-CKD         | 50 (13)        | 51 (13)        | 52 (12)        | 53 (13)        | 1807 (66%)        | 2702 (69%)         | 1692 (70%)         | 906 (67%)          | 3008 (52%)           | 3728 (49%)           | 2058 (46%)          | 1210 (47%)          |
| RENAAL          | 38 (13)        | 39 (13)        | 39 (12)        | 39 (12)        | 333 (100%)        | 530 (100%)         | 329 (100%)         | 276 (100%)         | 0 (0%)               | 0 (0%)               | 0 (0%)              | 0 (0%)              |
| SRR-CKD         | 23 (11)        | 24 (11)        | 24 (10)        | 25 (10)        | 605 (75%)         | 746 (77%)          | 384 (83%)          | 187 (81%)          | 0 (0%)               | 0 (0%)               | 0 (0%)              | 0 (0%)              |
| Sunnybrook      | 52 (33)        | 49 (28)        | 53 (28)        | 57 (32)        | 414 (74%)         | 477 (71%)          | 265 (72%)          | 158 (73%)          | 347 (38%)            | 401 (37%)            | 205 (36%)           | 95 (31%)            |
| <b>Subtotal</b> | <b>47 (18)</b> | <b>46 (15)</b> | <b>46 (14)</b> | <b>46 (14)</b> | <b>8483 (58%)</b> | <b>11314 (62%)</b> | <b>6650 (62%)</b>  | <b>4229 (60%)</b>  | <b>11991 (45%)</b>   | <b>15325 (46%)</b>   | <b>8351 (44%)</b>   | <b>5306 (43%)</b>   |
| <b>Total</b>    | <b>89 (18)</b> | <b>84 (17)</b> | <b>84 (17)</b> | <b>86 (18)</b> | <b>53418 (7%)</b> | <b>50688 (12%)</b> | <b>28126 (20%)</b> | <b>21404 (27%)</b> | <b>1131032 (60%)</b> | <b>1587290 (79%)</b> | <b>955701 (87%)</b> | <b>558586 (88%)</b> |

**eFigure 1. Relationships of BMI with Waist Circumference (A and B) and Waist-Height Ratio (C and D), in Women (A and C) and Men (B and D)**

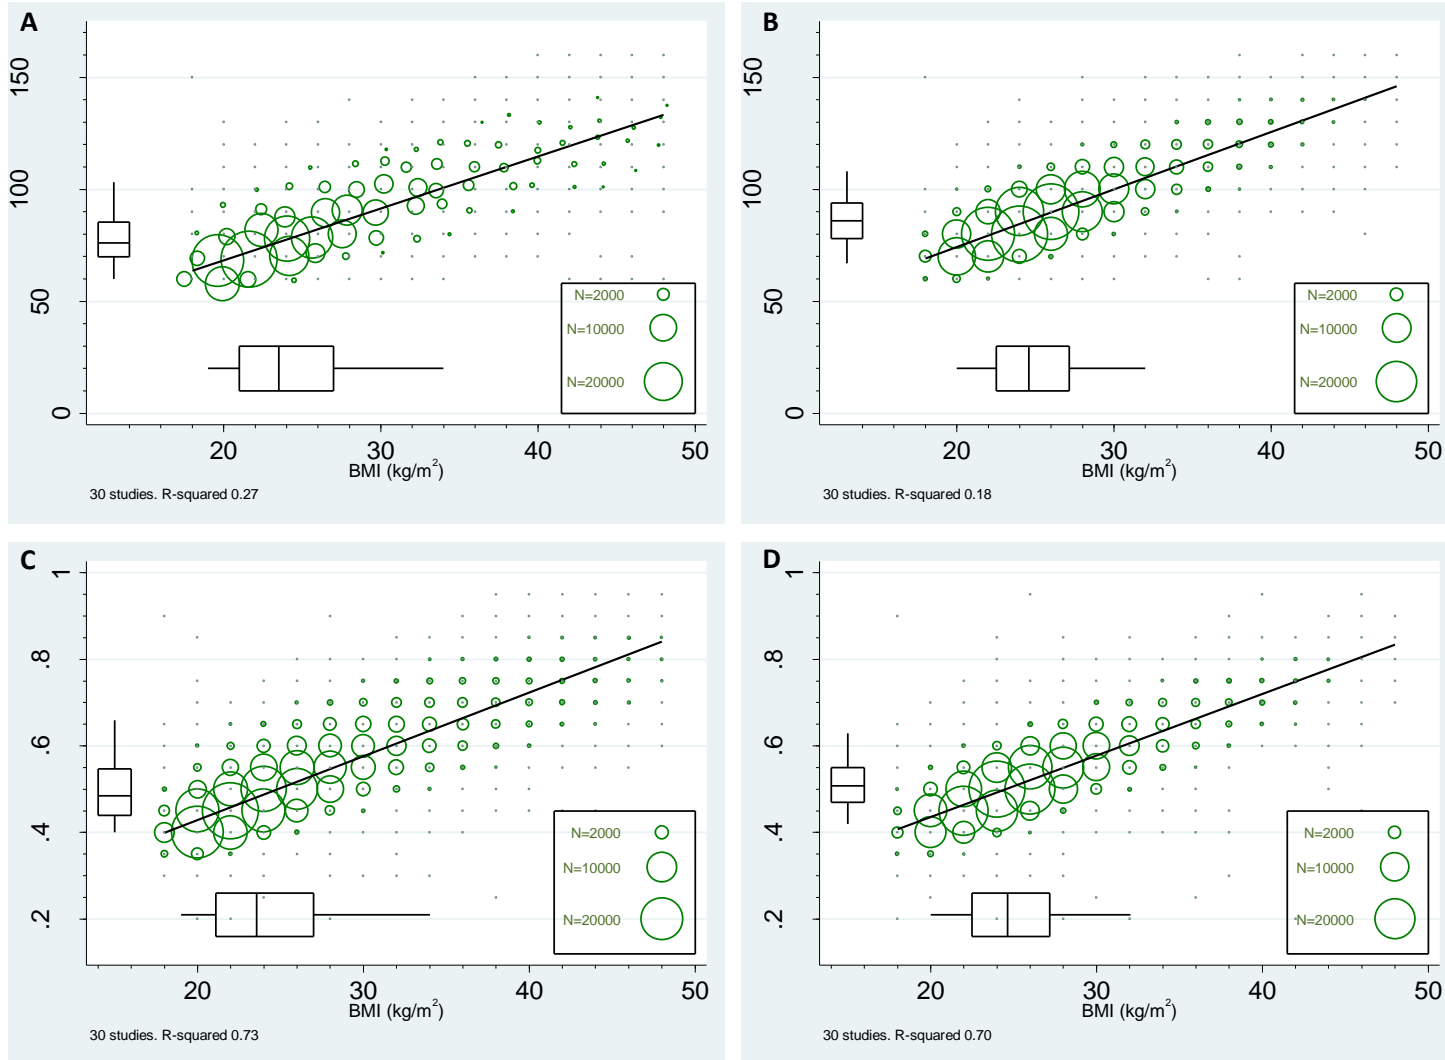

**eFigure 2. Hazard Ratios at 35 vs. 25 kg/m<sup>2</sup> in Individual General Population Cohorts, by Median Baseline Year**

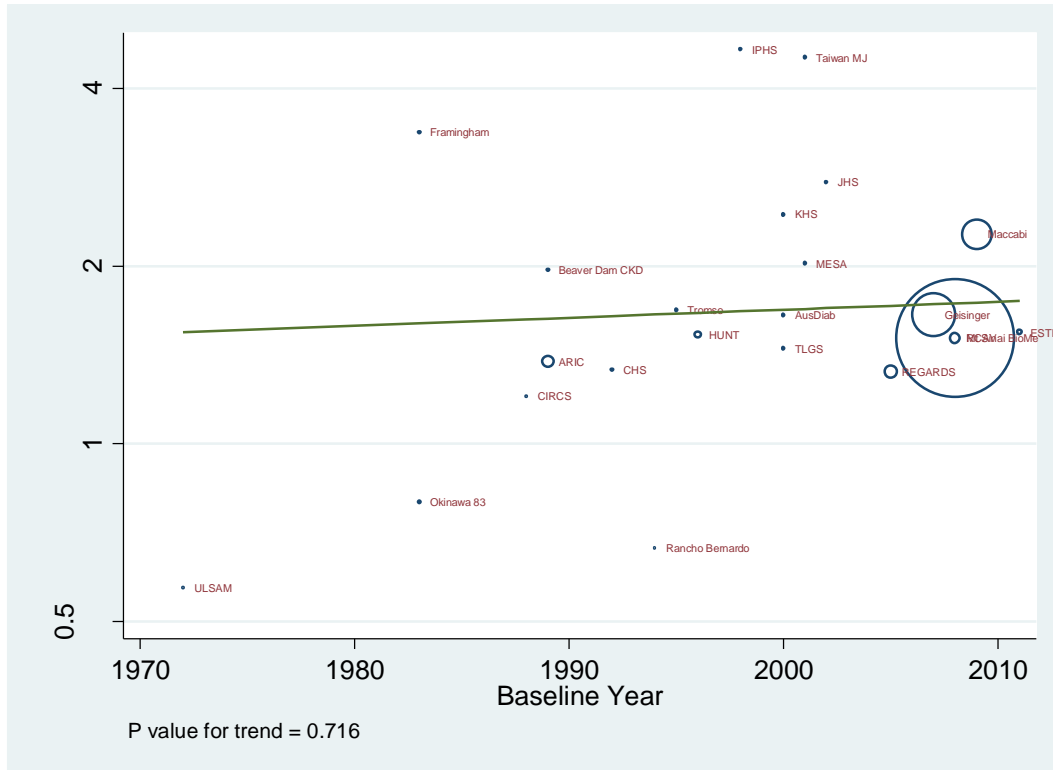

This figure plots the adjusted hazard ratio for each general population cohort study on the y-axis and the baseline year of the study on the x-axis. The green line corresponds to the meta-regression line of the log hazard ratios against the median baseline year of each cohort. The size of each bubble is inversely proportional to the variance of the effect estimate within each study cohort.

**eFigure 3. Sensitivity Analyses Excluding the First 3 Years of Follow-up (A), ESKD as the Sole Outcome (B), Competing Risk of Death (C), and Adjusting for Potential Mediators (D) for BMI in General Population Cohorts**

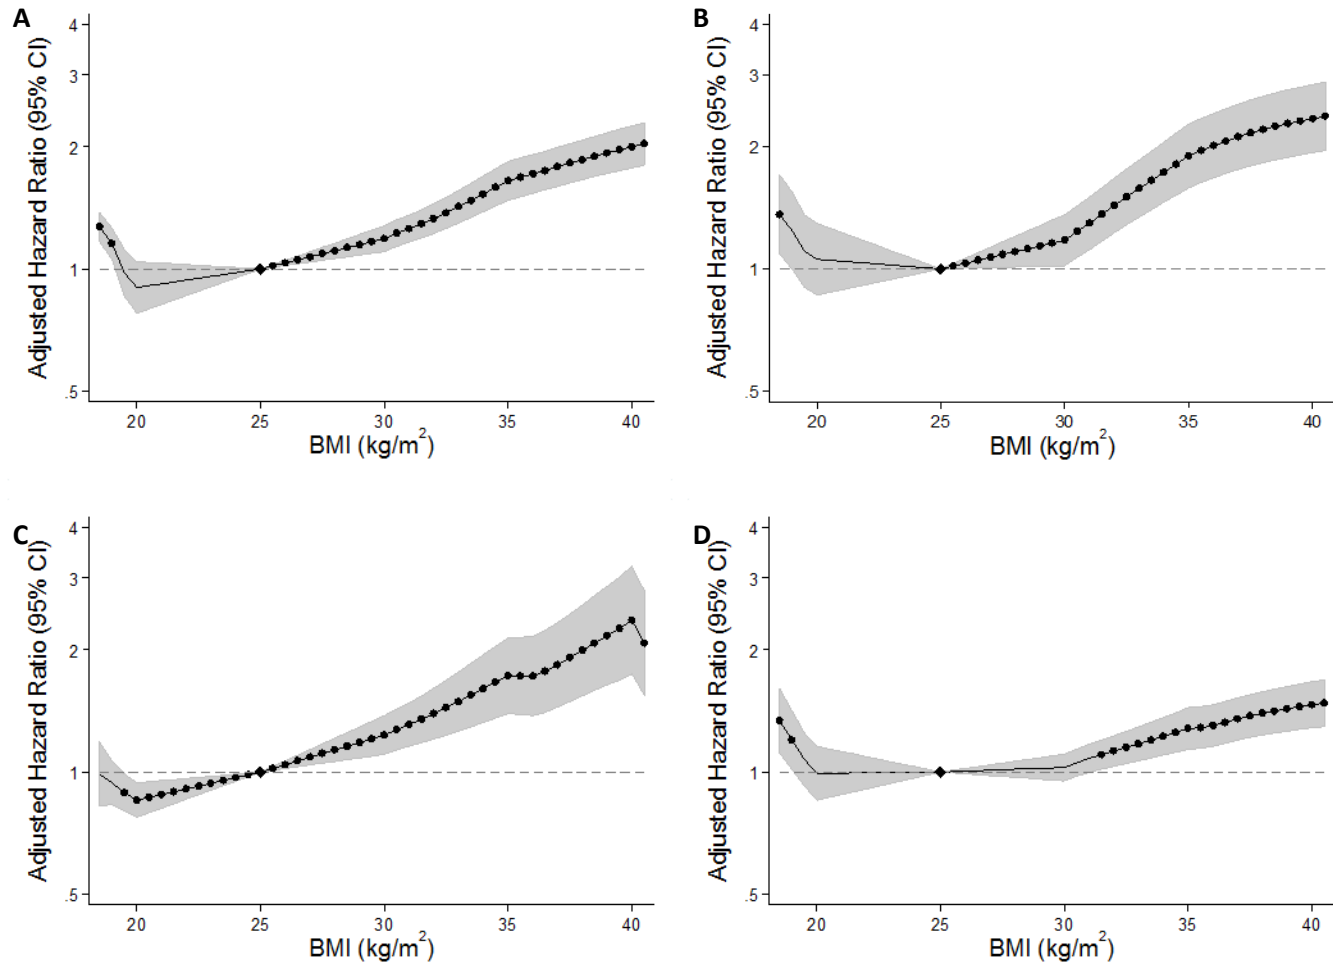

Panels demonstrates the meta-analyzed hazard ratio and 95% confidence interval related to body-mass index, modeled using linear splines with knots at 20, 25, 30, and 35 kg/m<sup>2</sup>, with solid circles indicating points in which there are significant differences in risk from the reference point at 25 kg/m<sup>2</sup>. Panel D is additionally adjustment for SBP, eGFR, diabetes, total cholesterol, and history of CVD beyond the demographic characteristics of age, sex, and race.

**eFigure 4. BMI Interactions by Age (A), Black Race (B), Hypertension (C), and Albuminuria (D) with GFR decline in General Population Cohorts**

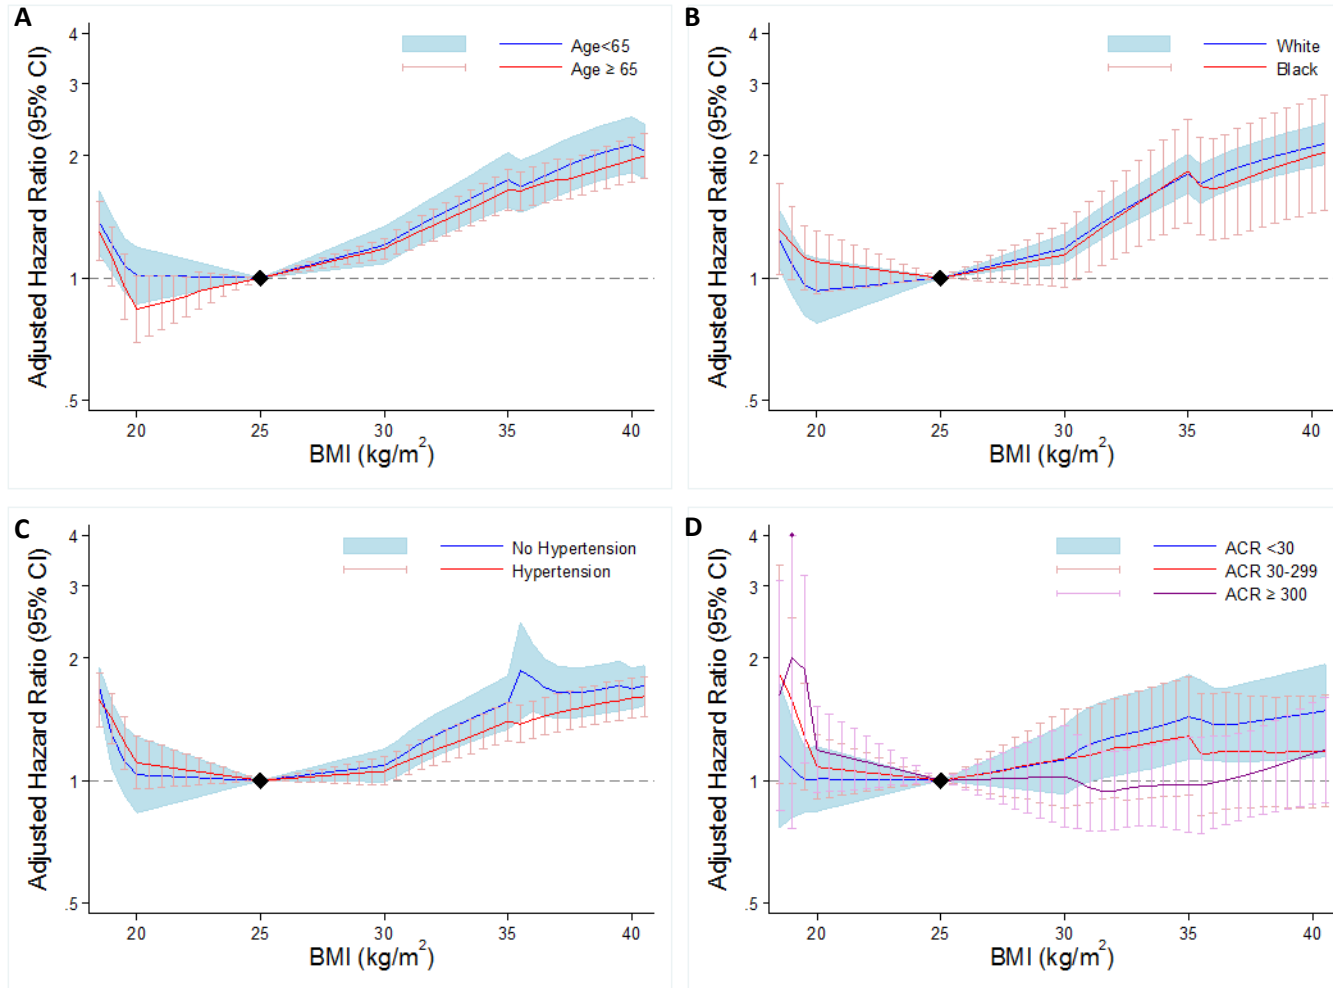

Panels demonstrates the meta-analyzed hazard ratio and 95% confidence interval related to body-mass index, modeled using linear splines with knots at 20, 25, 30, and 35 kg/m<sup>2</sup>, with a reference point at 25 kg/m<sup>2</sup> in each subgroup.



**eFigure 5. Sensitivity Analyses Excluding the First 3 Years of Follow-up (A), ESKD as the Sole Outcome (B), Competing Risk of Death (C), and Adjusting for Potential Mediators (D) for BMI in High CVD Risk Cohorts**

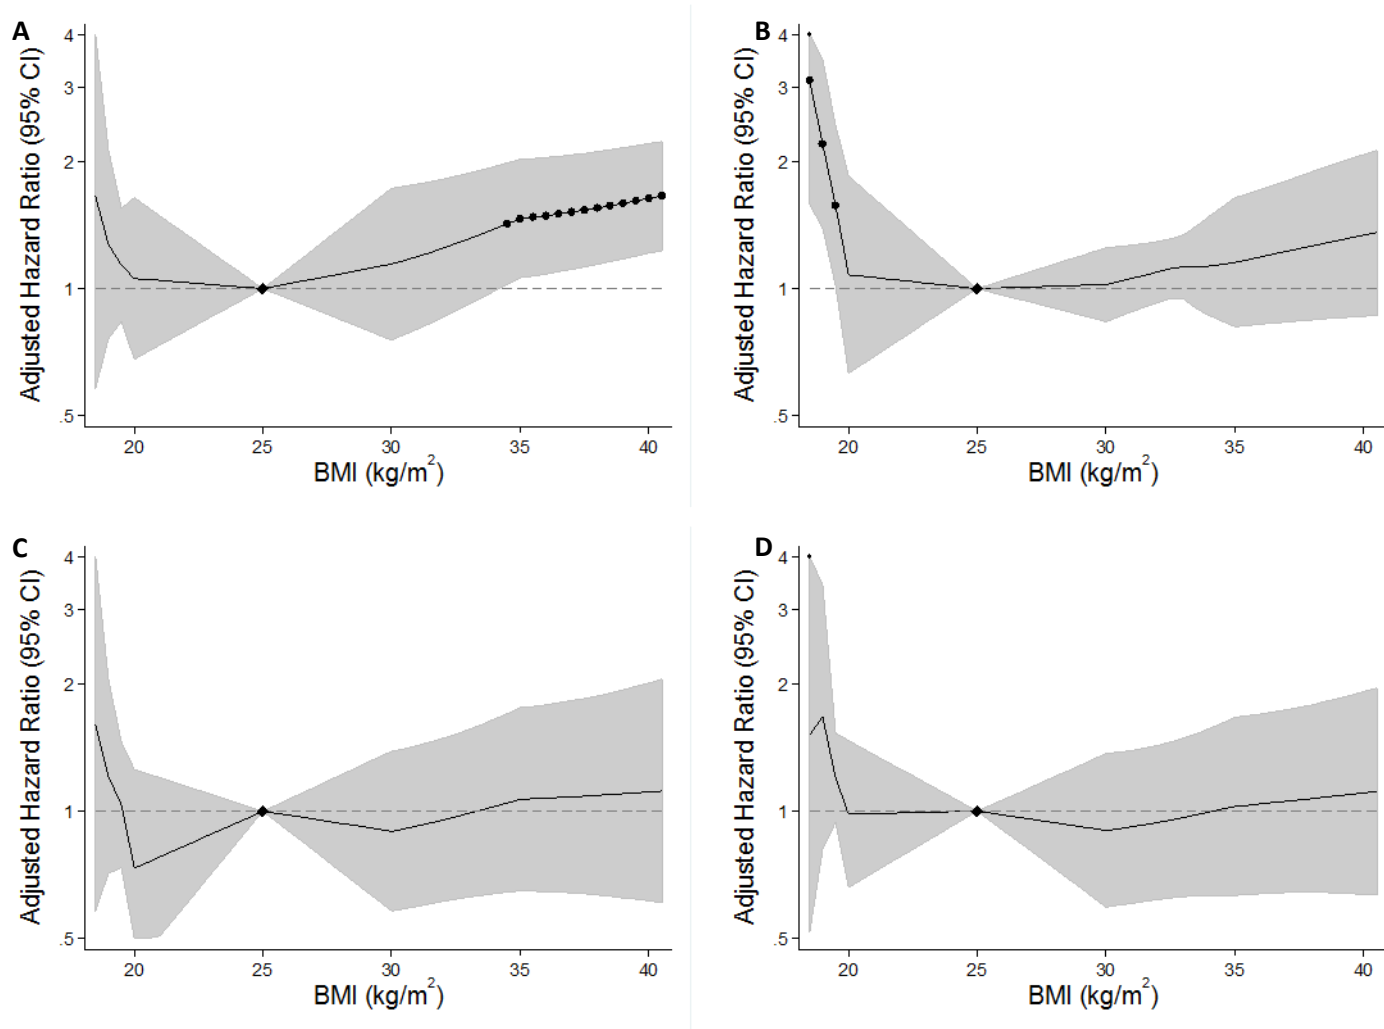

Panels demonstrates the meta-analyzed hazard ratio and 95% confidence interval related to body-mass index, modeled using linear splines with knots at 20, 25, 30, and 35 kg/m<sup>2</sup>, with solid circles indicating points in which there are significant differences in risk from the reference point at 25 kg/m<sup>2</sup>. Panel D is additionally adjustment for SBP, eGFR, diabetes, total cholesterol, and history of CVD beyond the demographic characteristics of age, sex, and race.

**eFigure 6. Sensitivity Analyses Excluding the First 3 Years of Follow-up (A), ESKD as the Sole Outcome (B), Competing Risk of Death (C), and Adjusting for Potential Mediators (D) for BMI in CKD Cohorts**

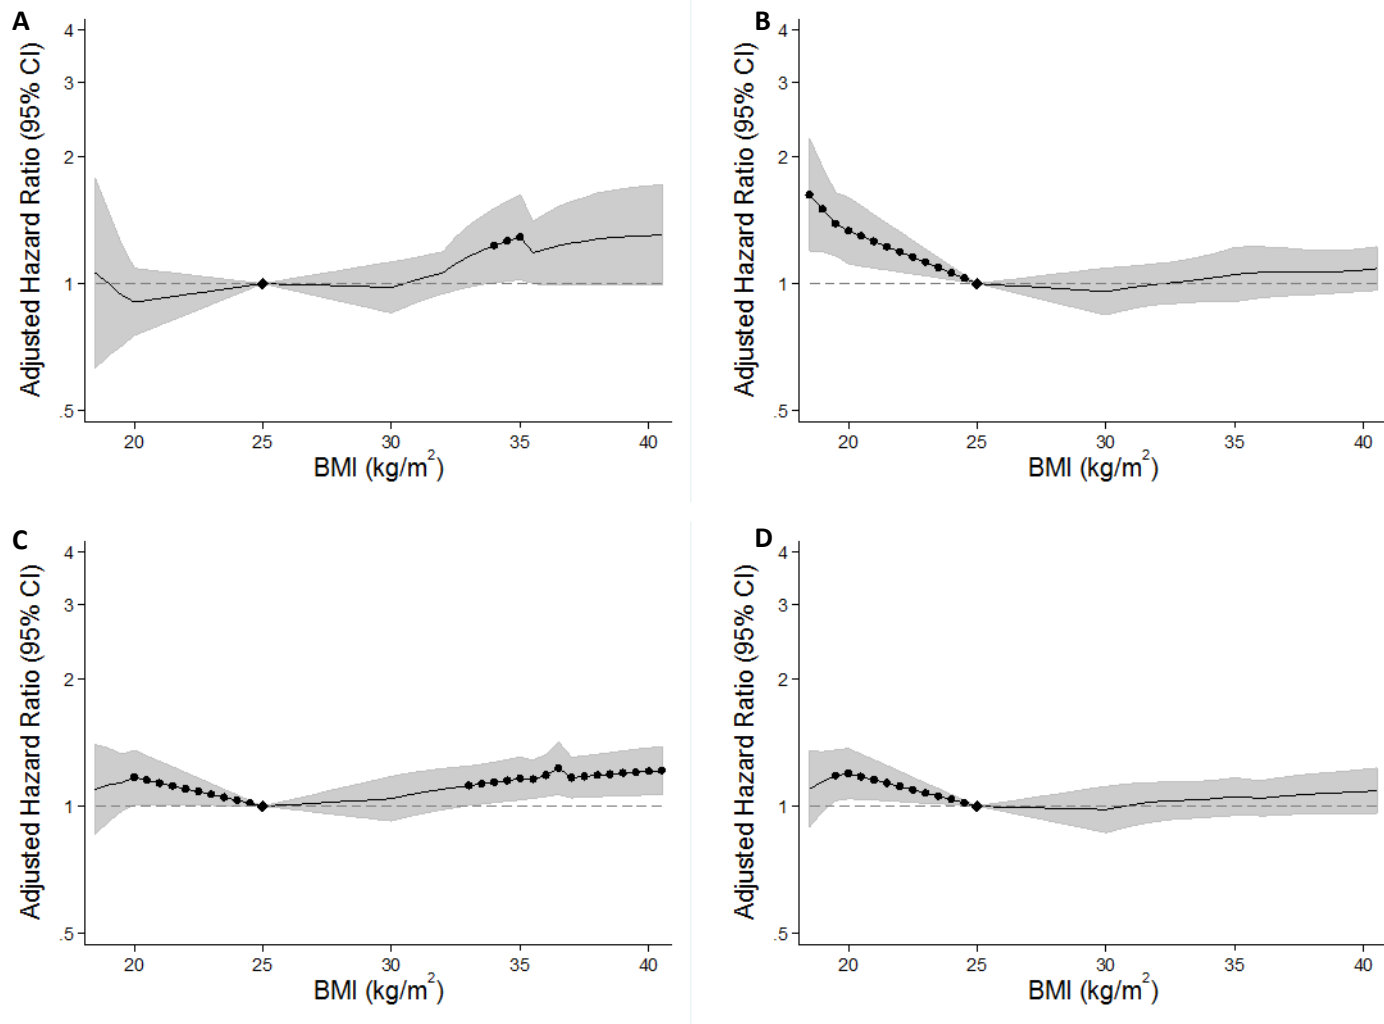

Panels demonstrates the meta-analyzed hazard ratio and 95% confidence interval related to body-mass index, modeled using linear splines with knots at 20, 25, 30, and 35 kg/m<sup>2</sup>, with solid circles indicating points in which there are significant differences in risk from the reference point at 25 kg/m<sup>2</sup>. Panel D is additionally adjustment for SBP, eGFR, diabetes, total cholesterol, and history of CVD beyond the demographic characteristics of age, sex, and race.

**eFigure 7. Association of Waist Circumference (A and C) and Waist-Height Ratio (B and D) with GFR Decline in High CVD Risk (A and B) and CKD (C and D) Cohorts**

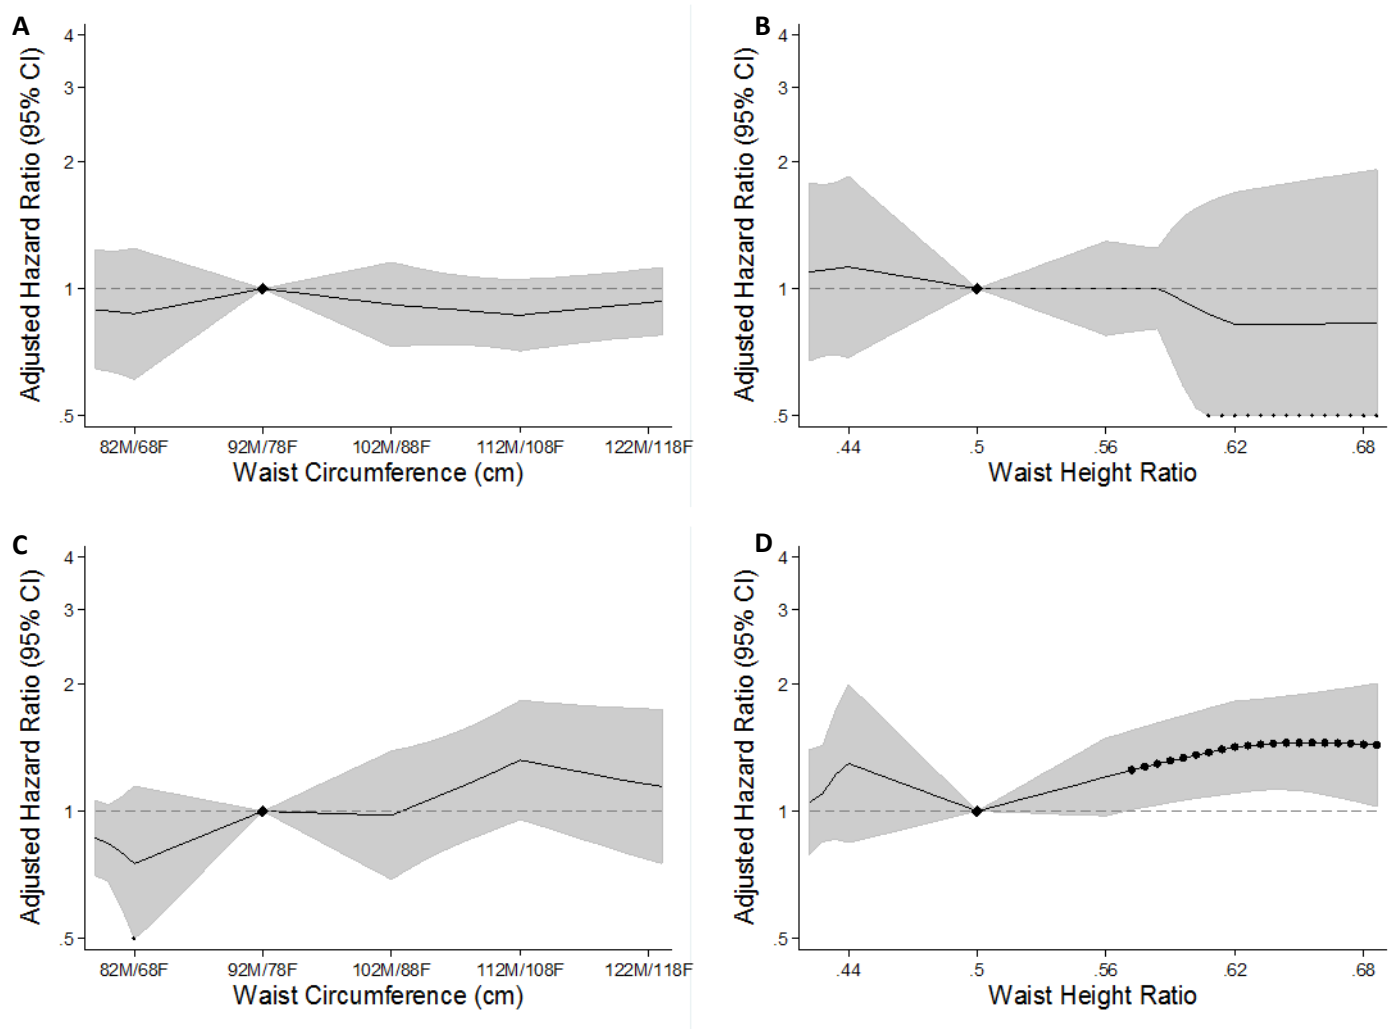

Panels demonstrate the meta-analyzed hazard ratio and 95% confidence interval related to waist circumference or waist-height ratio, modeled using linear splines with knots at 82cm/68cm, 92cm/78cm, 102cm/88cm, 112cm/108cm in men and women, respectively, for waist circumference and 0.44, 0.5, 0.56, 0.62 for waist-height ratio, with solid circles indicating points in which there are significant differences in risk from the reference point at 92cm in men/78cm in women for waist circumference and .5 for waist-height ratio.

**eFigure 8. Association of Adiposity Measures with All-Cause Mortality in General Population Cohorts**

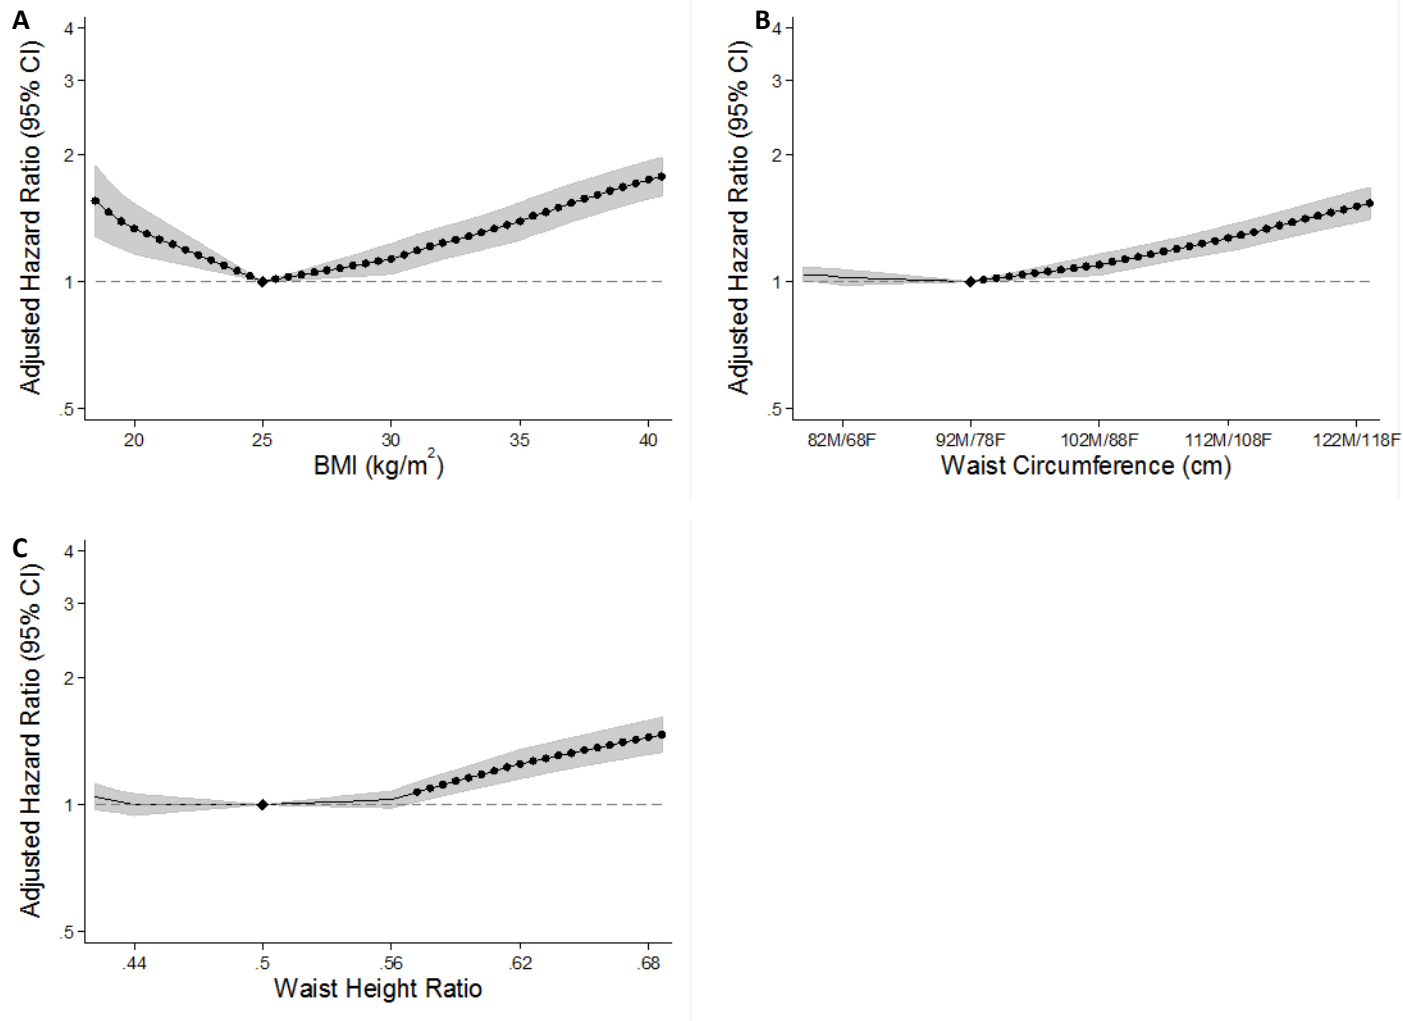

Panel demonstrates the meta-analyzed hazard ratio and 95% confidence interval related to body mass index, waist circumference, or waist-height ratio with solid circles indicating points in which there are significant differences in risk from the reference point at 25 kg/m<sup>2</sup> for body mass index, 92cm in men/78cm in women for waist circumference, and .5 for waist-height ratio.

**eFigure 9. Interaction of eGFR on BMI and Association with All-Cause Mortality in General Population Cohorts**

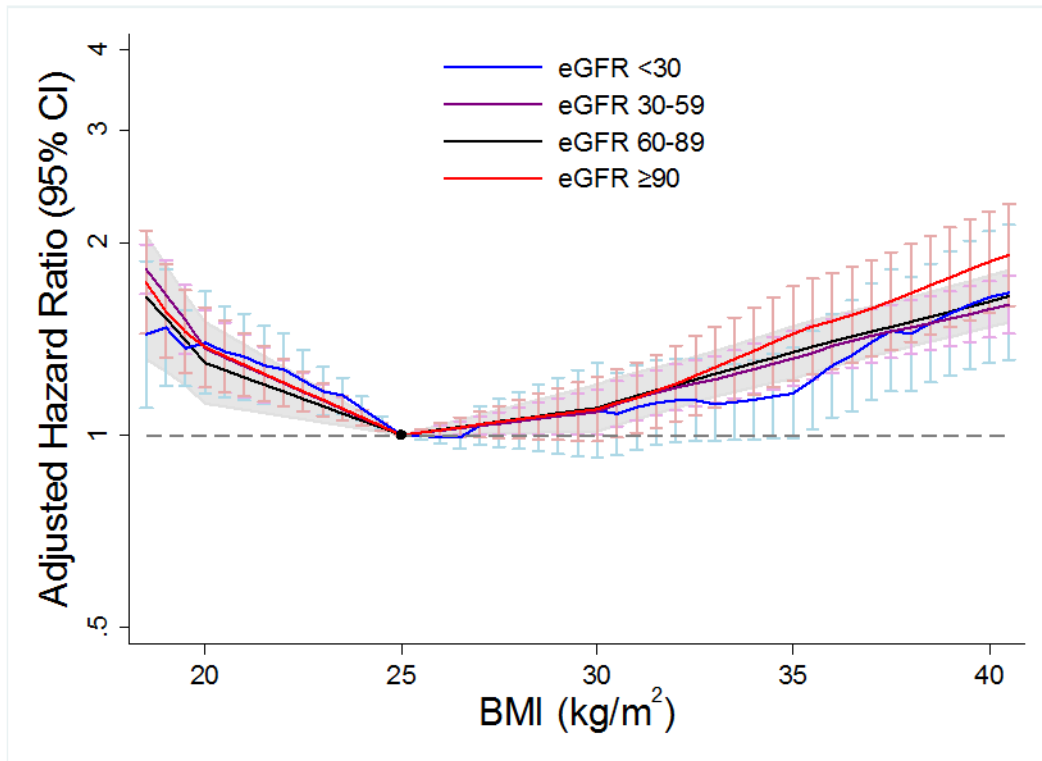

Panel demonstrates the meta-analyzed hazard ratio and 95% confidence interval related to body-mass index, modeled using linear splines with knots at 20, 25, 30, and 35 kg/m<sup>2</sup>, with a reference point at 25 kg/m<sup>2</sup> in each subgroup.

**eFigure 10. Sensitivity Analyses Excluding the First 3 Years of Follow-up (A) and Adjusting for Potential Mediators (B) for BMI and All-Cause Mortality in General Population Cohorts**

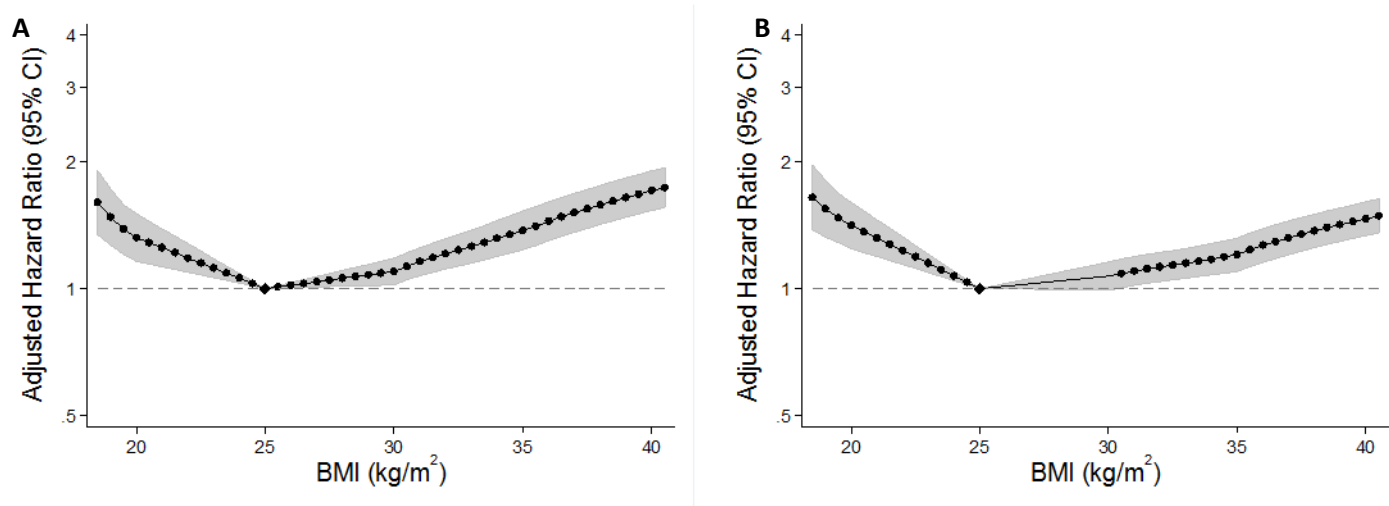

Panel A demonstrates the meta-analyzed hazard ratio and 95% confidence interval related to body-mass index, modeled using linear splines with knots at 20, 25, 30, and 35 kg/m<sup>2</sup>, with solid circles indicating points in which there are significant differences in risk from the reference point at 25 kg/m<sup>2</sup>. Panel B is additionally adjusted for SBP, eGFR, diabetes, total cholesterol, and history of CVD beyond the demographic characteristics of age, sex, and race.

**eFigure 11. Association of Adiposity Measures with All-Cause Mortality in High Cardiovascular Risk Cohorts**

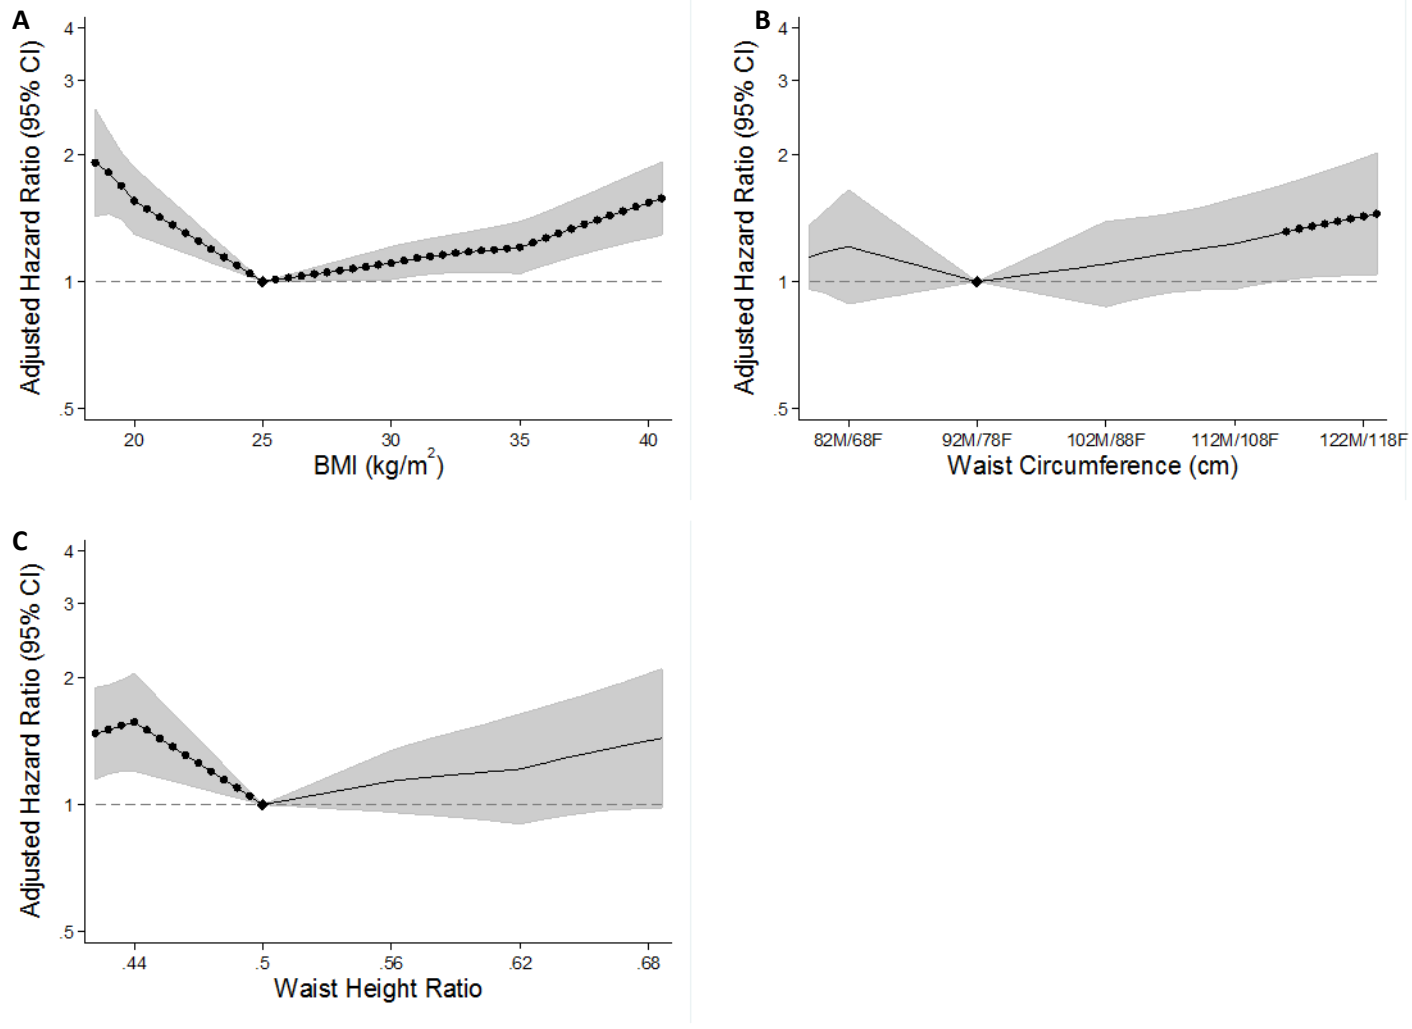

Panel demonstrates the meta-analyzed hazard ratio and 95% confidence interval related to body mass index, waist circumference, or waist-height ratio with solid circles indicating points in which there are significant differences in risk from the reference point at 25 kg/m<sup>2</sup> for body mass index, 92cm in men/78cm in women for waist circumference, and .5 for waist-height ratio.

**eFigure 12. Sensitivity Analyses Excluding the First 3 Years of Follow-up (A) and Adjusting for Potential Mediators (B) for BMI and All-Cause Mortality in High Cardiovascular Risk Cohorts**

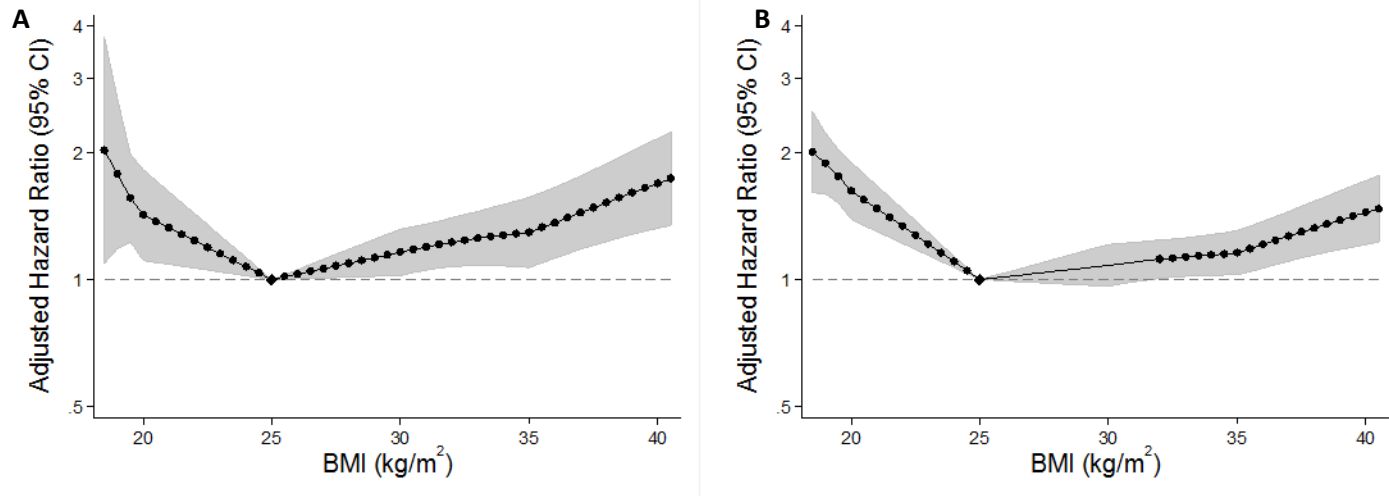

Panel A demonstrates the meta-analyzed hazard ratio and 95% confidence interval related to body-mass index, modeled using linear splines with knots at 20, 25, 30, and 35 kg/m<sup>2</sup>, with solid circles indicating points in which there are significant differences in risk from the reference point at 25 kg/m<sup>2</sup>. Panel B is additionally adjusted for SBP, eGFR, diabetes, total cholesterol, and history of CVD beyond the demographic characteristics of age, sex, and race.



**eFigure 13. Association of Adiposity Measures with All-Cause Mortality in CKD Cohorts**

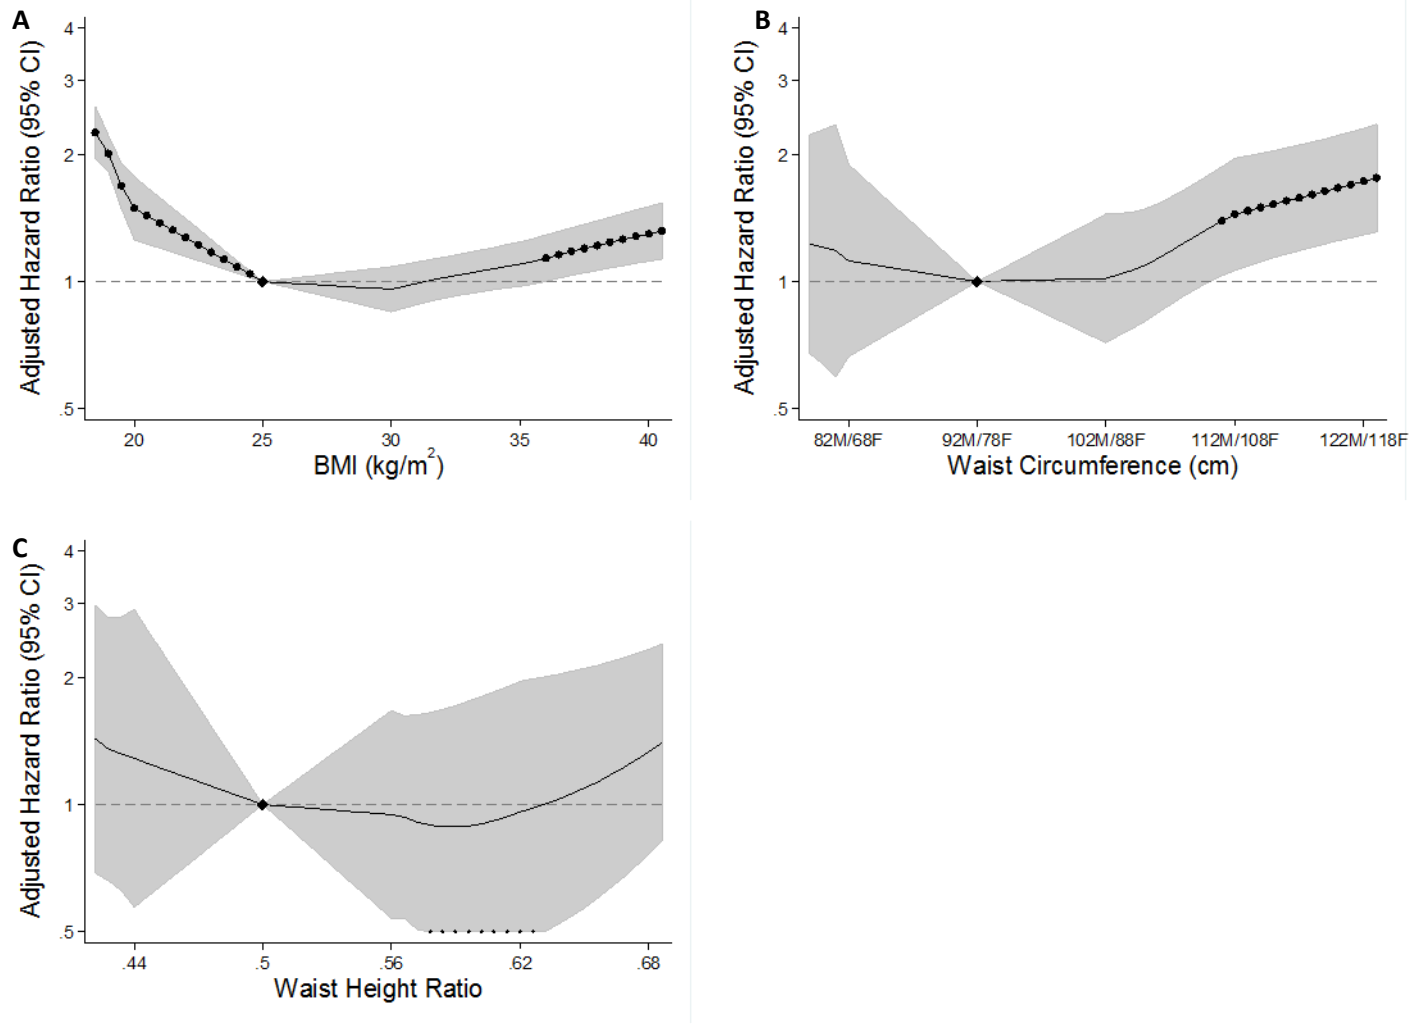

Panel demonstrates the meta-analyzed hazard ratio and 95% confidence interval related to body mass index, waist circumference, or waist-height ratio with solid circles indicating points in which there are significant differences in risk from the reference point at 25  $\text{kg/m}^2$  for body mass index, 92cm in men/78cm in women for waist circumference, and .5 for waist-height ratio.

**eFigure 14. Sensitivity Analyses Excluding the First 3 Years of Follow-up (A) and Adjusting for Potential Mediators (B) for BMI and All-Cause Mortality in CKD Cohorts**

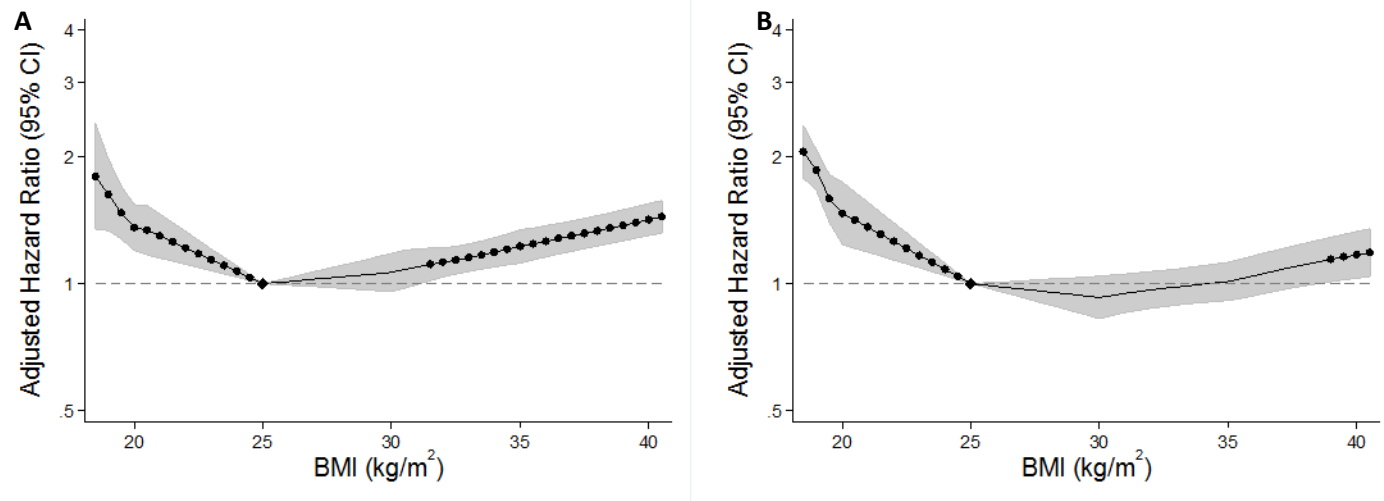

Panel A demonstrates the meta-analyzed hazard ratio and 95% confidence interval related to body-mass index, modeled using linear splines with knots at 20, 25, 30, and 35 kg/m<sup>2</sup>, with solid circles indicating points in which there are significant differences in risk from the reference point at 25 kg/m<sup>2</sup>. Panel B is additionally adjusted for SBP, eGFR, diabetes, total cholesterol, and history of CVD beyond the demographic characteristics of age, sex, and race.

## References

1. Matsushita K, van der Velde M, Astor BC, Woodward M, Levey AS, de Jong PE, et al. Association of estimated glomerular filtration rate and albuminuria with all-cause and cardiovascular mortality in general population cohorts: a collaborative meta-analysis. *Lancet* 2010;375(9731):2073-81.
2. Matsushita K, Mahmoodi BK, Woodward M, Emberson JR, Jafar TH, Jee SH, et al. Comparison of risk prediction using the CKD-EPI equation and the MDRD study equation for estimated glomerular filtration rate. *JAMA* 2012;307(18):1941-51.
3. Hallan SI, Matsushita K, Sang Y, Mahmoodi BK, Black C, Ishani A, et al. Age and Association of Kidney Measures With Mortality and End-stage Renal Disease. *JAMA* 2012;308(22):2349-60.
4. Levey AS, Coresh J, Greene T, Marsh J, Stevens LA, Kusek JW, et al. Expressing the Modification of Diet in Renal Disease Study Equation for Estimating Glomerular Filtration Rate with Standardized Serum Creatinine Values. *Clin Chem* 2007;53(4):766-72.
5. Levey AS, Stevens LA, Schmid CH, Zhang YL, Castro AF, 3rd, Feldman HI, et al. A new equation to estimate glomerular filtration rate. *Ann Intern Med* 2009;150(9):604-12.
6. Kidney Disease: Improving Global Outcomes (KDIGO) CKD Work Group. KDIGO 2012 Clinical Practice Guideline for the Evaluation and Management of Chronic Kidney Disease. *Kidney International Supplements* 2013;3(1):1-150.
7. Wright JT, Jr., Bakris G, Greene T, Agodoa LY, Appel LJ, Charleston J, et al. Effect of blood pressure lowering and antihypertensive drug class on progression of hypertensive kidney disease: results from the AASK trial. *JAMA* 2002;288(19):2421-31.
8. Patel A, MacMahon S, Chalmers J, Neal B, Woodward M, Billot L, et al. Effects of a fixed combination of perindopril and indapamide on macrovascular and microvascular outcomes in patients with type 2 diabetes mellitus (the ADVANCE trial): a randomised controlled trial. *Lancet* 2007;370(9590):829-40.
9. Mitsushashi H, Yatsuya H, Matsushita K, Zhang H, Otsuka R, Muramatsu T, et al. Uric acid and left ventricular hypertrophy in Japanese men. *Circ J* 2009;73(4):667-72.
10. Matsushita K, Selvin E, Bash LD, Franceschini N, Astor BC, Coresh J. Change in estimated GFR associates with coronary heart disease and mortality. *J Am Soc Nephrol* 2009;20(12):2617-24.
11. White SL, Polkinghorne KR, Atkins RC, Chadban SJ. Comparison of the Prevalence and Mortality Risk of CKD in Australia Using the CKD Epidemiology Collaboration (CKD-EPI) and Modification of Diet in Renal Disease (MDRD) Study GFR Estimating Equations: The AusDiab (Australian Diabetes, Obesity and Lifestyle) Study. *Am J Kidney Dis* 2010;55((4)):660-70.
12. Levin A, Djurdjev O, Beaulieu M, Er L. Variability and risk factors for kidney disease progression and death following attainment of stage 4 CKD in a referred cohort. *Am J Kidney Dis* 2008;52(4):661-71.
13. Shankar A, Klein R, Klein BE. The association among smoking, heavy drinking, and chronic kidney disease. *Am J Epidemiol* 2006;164(3):263-71.
14. Zhang L, Zuo L, Xu G, Wang F, Wang M, Wang S, et al. Community-based screening for chronic kidney disease among populations older than 40 years in Beijing. *Nephrol Dial Transplant* 2007;22(4):1093-99.
15. Levin A, Rigatto C, Brendan B, Madore F, Muirhead N, Holmes D, et al. Cohort profile: Canadian study of prediction of death, dialysis and interim cardiovascular events (CanPREDDICT). *BMC Nephrol* 2013;14:121.
16. Schold JD, Navaneethan SD, Jolly SE, Poggio ED, Arrigain S, Saupe W, et al. Implications of the CKD-EPI GFR estimation equation in clinical practice. *Clin J Am Soc Nephrol* 2011;6(3):497-504.

17. Shlipak MG, Katz R, Kestenbaum B, Fried LF, Newman AB, Siscovick DS, et al. Rate of kidney function decline in older adults: a comparison using creatinine and cystatin C. *Am J Nephrol* 2009;30(3):171-8.
18. Shimizu Y, Maeda K, Imano H, Ohira T, Kitamura A, Kiyama M, et al. Chronic kidney disease and drinking status in relation to risks of stroke and its subtypes: the Circulatory Risk in Communities Study (CIRCS). *Stroke* 2011;42(9):2531-7.
19. Jafar TH, Qadri Z, Hashmi S. Prevalence of microalbuminuria and associated electrocardiographic abnormalities in an Indo-Asian population. *Nephrol Dial Transplant* 2009;24(7):2111-16.
20. Landray MJ, Thambyrajah J, McGlynn FJ, Jones HJ, Baigent C, Kendall MJ, et al. Epidemiological evaluation of known and suspected cardiovascular risk factors in chronic renal impairment. *Am J Kidney Dis* 2001;38(3):537-46.
21. Zhang QL, Koenig W, Raum E, Stegmaier C, Brenner H, Rothenbacher D. Epidemiology of chronic kidney disease: results from a population of older adults in Germany. *Prev Med* 2009;48(2):122-7.
22. Parikh NI, Hwang S-J, Larson MG, Levy D, Fox CS. Chronic Kidney Disease as a Predictor of Cardiovascular Disease (from the Framingham Heart Study). *Am J Cardiol* 2008;102(1):47-53.
23. Titze S, Schmid M, Kottgen A, Busch M, Floege J, Wanner C, et al. Disease burden and risk profile in referred patients with moderate chronic kidney disease: composition of the German Chronic Kidney Disease (GCKD) cohort. *Nephrol Dial Transplant* 2015;30(3):441-51.
24. Perkins RM, Bucaloiu ID, Kirchner HL, Ashouian N, Hartle JE, Yahya T. GFR decline and mortality risk among patients with chronic kidney disease. *Clin J Am Soc Nephrol* 2011;6(8):1879-86.
25. Cirillo M, Lanti MP, Menotti A, Laurenzi M, Mancini M, Zanchetti A, et al. Definition of kidney dysfunction as a cardiovascular risk factor: use of urinary albumin excretion and estimated glomerular filtration rate. *Arch Intern Med* 2008;168(6):617-24.
26. Hallan SI, Coresh J, Astor BC, Asberg A, Powe NR, Romundstad S, et al. International comparison of the relationship of chronic kidney disease prevalence and ESRD risk. *J Am Soc Nephrol* 2006;17(8):2275-84.
27. Noda H, Iso H, Irie F, Sairenchi T, Ohtaka E, Doi M, et al. Low-density lipoprotein cholesterol concentrations and death due to intraparenchymal hemorrhage: the Ibaraki Prefectural Health Study. *Circulation* 2009;119(16):2136-45.
28. Lee BJ, Forbes K. The role of specialists in managing the health of populations with chronic illness: the example of chronic kidney disease. *BMJ* 2009;339:b2395.
29. Shalev V, Chodick G, Goren I, Silber H, Kokia E, Heymann AD. The use of an automated patient registry to manage and monitor cardiovascular conditions and related outcomes in a large health organization. *Int J Cardiol* 2011;152(3):345-9.
30. van Zuilen AD, Bots ML, Dulger A, van der Tweel I, van Buren M, Ten Dam MA, et al. Multifactorial intervention with nurse practitioners does not change cardiovascular outcomes in patients with chronic kidney disease. *Kidney Int* 2012;82:710-17.
31. Klahr S, Levey AS, Beck GJ, Caggiula AW, Hunsicker L, Kusek JW, et al. The effects of dietary protein restriction and blood-pressure control on the progression of chronic renal disease. Modification of Diet in Renal Disease Study Group. *N Engl J Med* 1994;330(13):877-84.
32. Bui AL, Katz R, Kestenbaum B, de Boer IH, Fried LF, Polak JF, et al. Cystatin C and carotid intima-media thickness in asymptomatic adults: the Multi-Ethnic Study of Atherosclerosis (MESA). *Am J Kidney Dis* 2009;53(3):389-98.
33. Kronenberg F, Kuen E, Ritz E, Junker R, Konig P, Kraatz G, et al. Lipoprotein(a) serum concentrations and apolipoprotein(a) phenotypes in mild and moderate renal failure. *J Am Soc Nephrol* 2000;11(1):105-15.

34. Roderick PJ, Atkins RJ, Smeeth L, Mylne A, Nitsch DD, Hubbard RB, et al. CKD and mortality risk in older people: a community-based population study in the United Kingdom. *Am J Kidney Dis* 2009;53(6):950-60.
35. Tayo BO, Teil M, Tong L, Qin H, Khitrov G, Zhang W, et al. Genetic background of patients from a university medical center in Manhattan: implications for personalized medicine. *PLoS ONE* 2011;6(5):e19166.
36. Junyent M, Martinez M, Borrás M, Bertriu A, Coll B, Craver L, et al. [Usefulness of imaging techniques and novel biomarkers in the prediction of cardiovascular risk in patients with chronic kidney disease in Spain: the NEFRONA project]. *Nefrologia* 2010;30(1):119-26.
37. Moranne O, Froissart M, Rossert J, Gauci C, Boffa JJ, Haymann JP, et al. Timing of onset of CKD-related metabolic complications. *J Am Soc Nephrol* 2009;20(1):164-71.
38. *National Health and Nutrition Examination Survey*. January 19. <https://wwwn.cdc.gov/nchs/nhanes/Default.aspx>.
39. Elley CR, Kenealy T, Robinson E, Drury PL. Glycated haemoglobin and cardiovascular outcomes in people with Type 2 diabetes: a large prospective cohort study. *Diabet Med* 2008;25(11):1295-301.
40. Nakayama M, Metoki H, Terawaki H, Ohkubo T, Kikuya M, Sato T, et al. Kidney dysfunction as a risk factor for first symptomatic stroke events in a general Japanese population--the Ohasama study. *Nephrol Dial Transplant* 2007;22(7):1910-5.
41. Iseki K, Ikemiya Y, Iseki C, Takishita S. Proteinuria and the risk of developing end-stage renal disease. *Kidney Int* 2003;63(4):1468-74.
42. Iseki K, Kohagura K, Sakima A, Iseki C, Kinjo K, Ikemiya Y, et al. Changes in the demographics and prevalence of chronic kidney disease in Okinawa, Japan (1993 to 2003). *Hypertens Res* 2007;30(1):55-62.
43. Pavkov ME, Knowler WC, Hanson RL, Bennett PH, Nelson RG. Predictive power of sequential measures of albuminuria for progression to ESRD or death in Pima Indians with type 2 diabetes. *Am J Kidney Dis* 2008;51(5):759-66.
44. Hillege HL, Fidler V, Diercks GF, van Gilst WH, de Zeeuw D, van Veldhuisen DJ, et al. Urinary albumin excretion predicts cardiovascular and noncardiovascular mortality in general population. *Circulation* 2002;106(14):1777-82.
45. Jassal SK, Kritz-Silverstein D, Barrett-Connor E. A Prospective Study of Albuminuria and Cognitive Function in Older Adults: The Rancho Bernardo Study. *Am J Epidemiol* 2010;171(3):277-86.
46. Kovesdy CP, Norris KC, Boulware LE, Lu JL, Ma JZ, Streja E, et al. Association of Race With Mortality and Cardiovascular Events in a Large Cohort of US Veterans. *Circulation* 2015;132(16):1538-48.
47. Howard VJ, Cushman M, Pulley L, Gomez CR, Go RC, Prineas RJ, et al. The reasons for geographic and racial differences in stroke study: objectives and design. *Neuroepidemiology* 2005;25(3):135-43.
48. Brenner BM, Cooper ME, de Zeeuw D, Keane WF, Mitch WE, Parving HH, et al. Effects of losartan on renal and cardiovascular outcomes in patients with type 2 diabetes and nephropathy. *N Engl J Med* 2001;345(12):861-9.
49. Ikram MA, Brusselle GGO, Murad SD, van Duijn CM, Franco OH, Goedegebure A, et al. The Rotterdam Study: 2018 update on objectives, design and main results. *Eur J Epidemiol* 2017;32(9):807-50.
50. Sabanayagam C, Teo BW, Tai ES, Jafar TH, Wong TY. Ethnic differences in the association between blood pressure components and chronic kidney disease in middle aged and older Asian adults. *BMC Nephrol* 2013;14:86.
51. Lundstrom UH, Gasparini A, Bellocco R, Qureshi AR, Carrero JJ, Evans M. Low renal replacement therapy incidence among slowly progressing elderly chronic kidney disease patients referred to nephrology care: an observational study. *BMC Nephrol* 2017;18(1):59.

52. Tangri N, Stevens LA, Griffith J, Tighiouart H, Djurdjev O, Naimark D, et al. A predictive model for progression of chronic kidney disease to kidney failure. *JAMA* 2011;305(15):1553-9.
53. Wen CP, Cheng TY, Tsai MK, Chang YC, Chan HT, Tsai SP, et al. All-cause mortality attributable to chronic kidney disease: a prospective cohort study based on 462 293 adults in Taiwan. *Lancet* 2008;371(9631):2173-82.
54. Konta T, Hao Z, Abiko H, Ishikawa M, Takahashi T, Ikeda A, et al. Prevalence and risk factor analysis of microalbuminuria in Japanese general population: the Takahata study. *Kidney Int* 2006;70(4):751-6.
55. Hosseinpanah F, Barzin M, Golkashani HA, Nassiri AA, Sheikholeslami F, Azizi F. Association between moderate renal insufficiency and cardiovascular events in a general population: Tehran lipid and glucose study. *BMC Nephrol* 2012;13:59.
56. Nerpin E, Ingelsson E, Riserus U, Sundstrom J, Larsson A, Jobs E, et al. The combined contribution of albuminuria and glomerular filtration rate to the prediction of cardiovascular mortality in elderly men. *Nephrol Dial Transplant* 2011;26(9):2820-7.
57. Bilo HJ, Logtenberg SJ, Joosten H, Groenier KH, Ubink-Veltmaat LJ, Kleefstra N. Modification of diet in renal disease and Cockcroft-Gault formulas do not predict mortality (ZODIAC-6). *Diabet Med* 2009;26(5):478-82.
